# Supplementary material for: Efficient generation of an oxidopyrylium ylide using a Pd catalyst and its [5+2] cycloadditions with several dipolarophiles
Source: Royal Society of Chemistry journal article supplement (doi:10.1039/c7cc09552j), 2018-01-01

# Efficient generation of an oxidopyrylium ylide using a Pd catalyst and its [5+2] cycloadditions with several dipolarophiles

*Hiroyuki Suga,\* Taichi Iwai, Masahiro Shimizu, Kie Takahashi, and Yasunori Toda*

Department of Materials Chemistry, Faculty of Engineering, Shinshu University

Wakasato, Nagano 380-8553, Japan

## Table of Contents

|                                                                                                                                                   |         |
|---------------------------------------------------------------------------------------------------------------------------------------------------|---------|
| Optimization of reaction conditions for the cycloaddition with <i>n</i> -propyl vinyl ether.....                                                  | S2      |
| HOMO and LUMO energies by DFT calculations.....                                                                                                   | S3-S4   |
| Hammett plots for styrene cycloadducts.....                                                                                                       | S4      |
| The reaction of 2 <i>H</i> -pyran-3(6 <i>H</i> )-one <b>1</b> with Pd <sub>2</sub> (dba) <sub>3</sub> in methanol- <i>d</i> <sub>4</sub> .....    | S5      |
| Experimental section (general methods, materials, general procedure for Pd-catalyzed [5 + 2] cycloaddition reactions) .....                       | S6-S25  |
| References.....                                                                                                                                   | S25-S26 |
| <sup>1</sup> H and <sup>13</sup> C-NMR spectra of cycloadducts.....                                                                               | S27-S50 |
| <sup>1</sup> H and <sup>13</sup> C-NMR spectra of 6-[( <i>tert</i> -butoxycarbonyl)oxy]-6-acetoxymethyl-2 <i>H</i> -pyran-3(6 <i>H</i> )-one..... | S51     |

## Optimization of reaction conditions for the cycloaddition with *n*-propyl vinyl ether

Table S1. Reactions of 2*H*-pyran-3(6*H*)-one **1** with *n*-propyl vinyl ether (**5a**) in the presence of [Pd( $\eta^3$ -C<sub>3</sub>H<sub>5</sub>)Cl]<sub>2</sub><sup>a</sup>

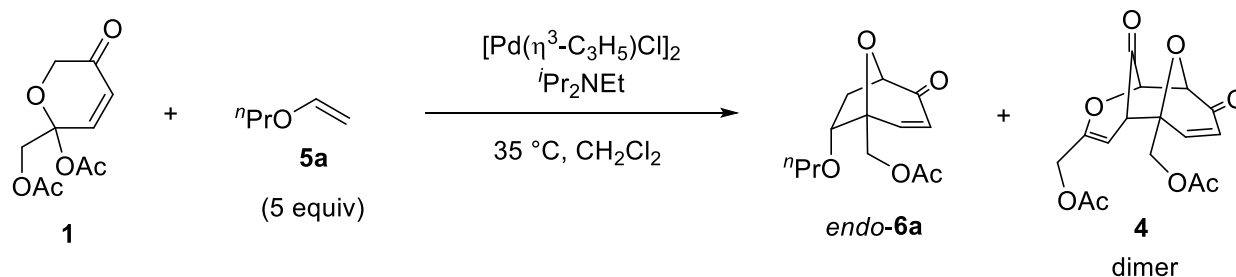

| entry | [Pd( $\eta^3$ -C <sub>3</sub> H <sub>5</sub> )Cl] <sub>2</sub><br>(mol%) | <i>i</i> Pr <sub>2</sub> NEt<br>(equiv) | conc.<br>(M) | time<br>(h) | yield of <i>endo</i> - <b>6a</b><br>(%) | yield of <b>4</b><br>(%) |
|-------|--------------------------------------------------------------------------|-----------------------------------------|--------------|-------------|-----------------------------------------|--------------------------|
| 1     | none                                                                     | 1                                       | 0.063        | 20          | 10 <sup>b,c</sup>                       | trace                    |
| 2     | 10                                                                       | 1                                       | 0.063        | 25          | 55                                      | 15                       |
| 3     | 10                                                                       | 1                                       | 0.13         | 12          | 61                                      | 14                       |
| 4     | 10                                                                       | 0.5                                     | 0.13         | 16          | 66                                      | 10                       |
| 5     | 10                                                                       | 0.2                                     | 0.13         | 40          | 71                                      | 4                        |

<sup>a</sup> The reaction of 2*H*-pyran-3(6*H*)-one **1** with *n*-propyl vinyl ether (**5a**) (5.0 equiv) was carried out at 35 °C in the presence *i*Pr<sub>2</sub>NEt and [Pd( $\eta^3$ -C<sub>3</sub>H<sub>5</sub>)Cl]<sub>2</sub> in CH<sub>2</sub>Cl<sub>2</sub>. <sup>b</sup> Determined by <sup>1</sup>H NMR analysis using 1,1,2,2-tetrachloroethane as an internal standard. <sup>c</sup> 86% of 2*H*-pyran-3(6*H*)-one **1** was recovered.

## HOMO and LUMO energies by DFT calculations

All calculations were performed using B3LYP/6-311G\*\*/B3LYP/6-31G\* level of theory with Spartan '08. To evaluate the reactivity of styrene derivatives toward oxidopyrylium ylide **A** generated from 2*H*-pyran-3(6*H*)-one **1**, HOMO and LUMO energies of the oxidopyrylium ylide and *p*-substituted styrene derivatives were calculated (Table S2).

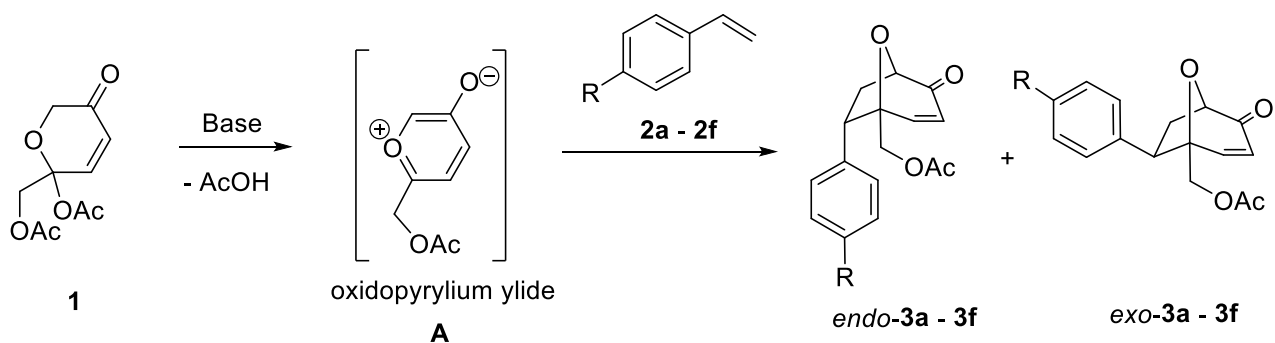

Scheme S1. [5 + 2] cycloadditions between oxidopyrylium ylide **A** and styrenes

Table S2. HOMO and LUMO energies of oxidopyrylium ylide **A** and *p*-substituted styrene derivatives **2a - 2f**<sup>a</sup>

| Reactant (R)                   | HOMO    | LUMO   | LUMO <sub>A</sub> – HOMO <sub>2 or A</sub> | LUMO <sub>2 or A</sub> – HOMO <sub>A</sub> |
|--------------------------------|---------|--------|--------------------------------------------|--------------------------------------------|
| ylide <b>A</b>                 | -137.36 | -67.37 | <b>69.99</b>                               | <b>69.99</b>                               |
| <b>2a</b> (H)                  | -144.64 | -26.31 | <b>77.27</b>                               | 111.05                                     |
| <b>2b</b> (Cl)                 | -147.47 | -33.20 | <b>80.10</b>                               | 104.16                                     |
| <b>2c</b> (CO <sub>2</sub> Me) | -151.15 | -43.32 | <b>83.78</b>                               | 94.04                                      |
| <b>2d</b> (CN)                 | -157.56 | -49.57 | 90.19                                      | <b>87.79</b>                               |
| <b>2e</b> (Me)                 | -140.21 | -24.03 | <b>72.84</b>                               | 113.33                                     |
| <b>2f</b> (OMe)                | -132.39 | -19.46 | <b>65.02</b>                               | 117.90                                     |

<sup>a</sup> All energies in kcal mol<sup>-1</sup>.

The HOMO–LUMO gaps between the oxidopyrylium ylide **A** and non- or *p*-substituted styrene derivatives **2** are smaller for LUMO<sub>A</sub>–HOMO<sub>2</sub> than for LUMO<sub>2</sub>–HOMO<sub>A</sub> except in the case of **2c**, and suggest that the [5+2] cycloadditions proceed in an inverse electron-demand fashion. Importantly, the reactivity of styrenes evaluated from the HOMO–LUMO gaps was parallel with the yields obtained experimentally in the Pd-catalyzed cycloadditions (see Scheme 2a in the text).

### Hammett plots for styrene cycloadducts

To further analyze the reactivity of styrenes **2** toward oxidopyrylium ylide **A**, we constructed Hammett plots using  $\sigma_p^+$  values<sup>1</sup> to assess the chemical yield of cycloadducts **3** for the *p*-substituent (R) of the styrenes **2a** – **2c**, **2e**, and **2f** (Figure S1). The negative slope was observed, implying that electron-rich styrenes are more favored reaction partners with **A** than electron-deficient styrenes on the basis of their electronic properties. The plot of styrene **2d** was deviated from the linear approximation ( $\sigma_p^+$ : 0.66, yield: 53%, log (yield): 1.72).

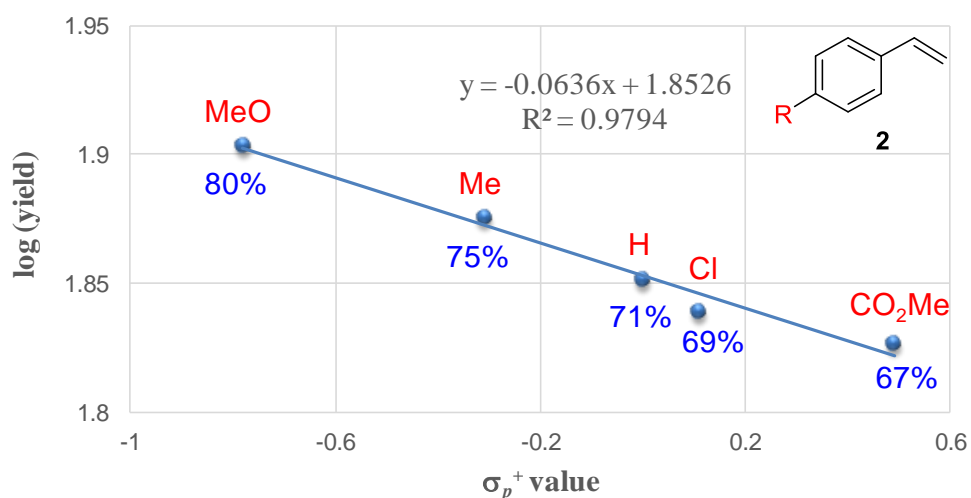

Figure S1. The logarithm of the chemical yield of **2** is plotted against  $\sigma_p^+$  values.

**The reaction of 2*H*-pyran-3(6*H*)-one **1** with Pd<sub>2</sub>(dba)<sub>3</sub> in methanol-*d*<sub>4</sub>**

According to the literature reported by Feringa et al.,<sup>2</sup> the reaction of 2*H*-pyran-3(6*H*)-one **1** with methanol-*d*<sub>4</sub> in the presence of Pd<sub>2</sub>(dba)<sub>3</sub> (10 mol%) was carried out and monitored by <sup>1</sup>H NMR. Although the Pd-allyl intermediate could not be observed, the reaction proceeded cleanly to afford the corresponding methanol adduct **S1** (Figure S2).

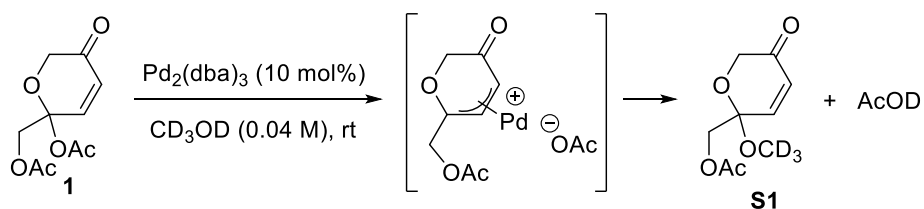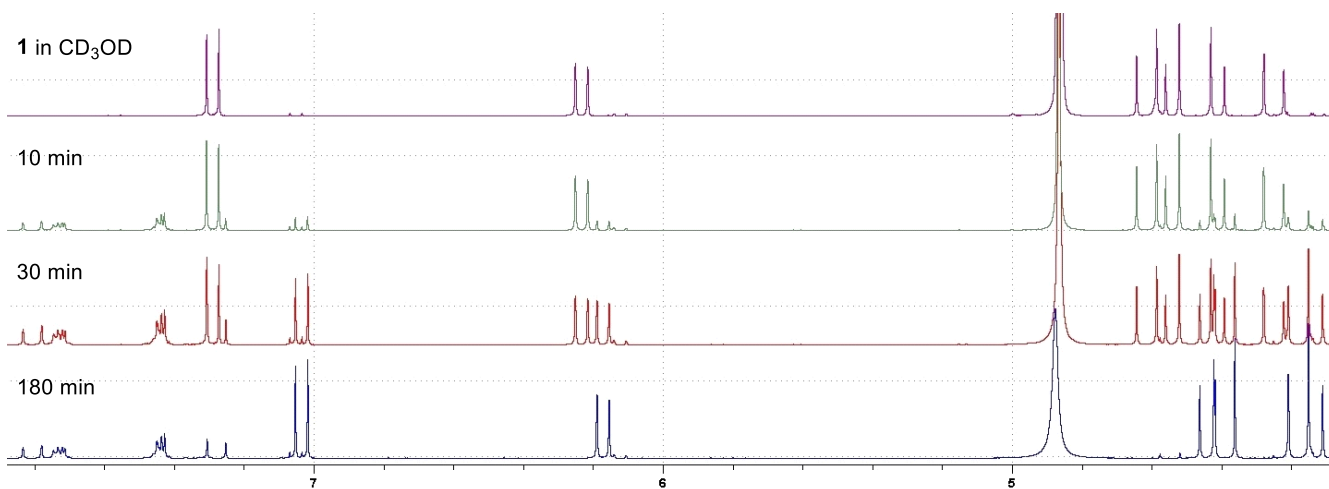

Figure S2. The reaction of 2*H*-pyran-3(6*H*)-one **1** with Pd<sub>2</sub>(dba)<sub>3</sub> in methanol-*d*<sub>4</sub>

**S1**: <sup>1</sup>H NMR (300 MHz, CD<sub>3</sub>OD) δ 2.08 (3H, s), 4.13 (1H, d, *J* = 12.0 Hz), 4.18 (1H, d, *J* = 17.1 Hz), 4.39 (1H, d, *J* = 17.1 Hz), 4.44 (1H, d, *J* = 12.0 Hz), 6.17 (1H, d, *J* = 10.5 Hz), 7.04 (1H, d, *J* = 10.5 Hz).

AcOD: <sup>1</sup>H NMR (300 MHz, CD<sub>3</sub>OD) δ 1.99 (3H, s).

## Experimental section

### General.

Melting points were determined on a Yanaco MP-13 melting point apparatus and are uncorrected. IR spectra were taken with a JASCO FT/IR-5300S spectrophotometer. <sup>1</sup>H NMR spectra were recorded on BRUKER AVANCE III Fourier 300 (300 MHz) and Ascend 500 (500 MHz) spectrometers. Chemical shifts are expressed in parts per million downfield from tetramethylsilane as an internal standard. <sup>13</sup>C NMR spectra were recorded on BRUKER AVANCE III Fourier 300 (75 MHz) and Ascend 500 (125 MHz) spectrometers using broadband proton decoupling. Chemical shifts are expressed in parts per million using the middle resonance of CDCl<sub>3</sub> (77.0 ppm) and C<sub>6</sub>D<sub>6</sub> (128.06 ppm) as an internal standard. Hydrogen multiplicity (C, CH, CH<sub>2</sub>, CH<sub>3</sub>) information was obtained from carbon DEPT spectrum. High-resolution mass spectra were obtained on a BRUKER micrOTOF II ESI-TOF spectrometer. For preparative column chromatography, Wakogel C-300HG or Fuji Silysia PSQ60B was employed. All reactions were carried out under an argon atmosphere in dried glassware.

### Materials.

6-Acetoxy-6-acetoxymethyl-2*H*-pyran-3(6*H*)-one (**1**) was prepared according to the procedure reported in the literature.<sup>3,4</sup> Styrene derivatives **2a**, **2b**, **2e**, **2f**, vinyl ethers **5a** – **5d**, *t*-butyl acrylate (**7a**), *N*-phenylmaleimide (**7c**), and  $\alpha$ -methylene- $\gamma$ -butyrolactone (**9c**) are commercially available, and were purified by distillation or recrystallization before used. Other styrene derivatives **2c**,<sup>5</sup> **2d**,<sup>6</sup> **2g**,<sup>7</sup> **2h**,<sup>8</sup> and **2i**<sup>3</sup> were prepared by the procedure reported in the literature. 2-Acryloyl-1-benzyl-5,5-dimethyl-3-pyrazolidinone (**7b**) was prepared by the procedure reported previously.<sup>9</sup> 1-Methylene-1,2,3,4-tetrahydronaphthalene (**9a**),<sup>10</sup> 1-methylene-2,3-dihydro-1*H*-indene (**9b**),<sup>11</sup>  $\alpha$ -methylene- $\delta$ -valerolactone (**9d**),<sup>12</sup> and 3,4-dihydro-2-methylene-1(2*H*)-naphthalenone (**9e**)<sup>13</sup> were prepared according to the procedure reported in the literature. [Pd( $\eta^3$ -C<sub>3</sub>H<sub>5</sub>)Cl]<sub>2</sub>, PdCl<sub>2</sub>, Pd(PPh<sub>3</sub>)<sub>4</sub>, and Pd<sub>2</sub>(dba)<sub>3</sub> are commercially available, and were used without further purification.

**General procedure for the Pd-catalyzed cycloaddition was exemplified by the reaction of 6-acetoxy-6-acetoxymethyl-2*H*-pyran-3(6*H*)-one (**1**) with styrene (**2a**).** [Pd( $\eta^3$ -C<sub>3</sub>H<sub>5</sub>)Cl]<sub>2</sub> (9.2 mg, 0.025 mmol, 10 mol%), styrene (143  $\mu$ L, 1.25 mmol, 5.0 equiv), and *N,N*-diisopropylethylamine (43.5

$\mu\text{L}$ , 0.25 mmol, 1.0 equiv) were successively added into a Schlenk tube. A solution of 6-acetoxy-6-acetoxymethyl-2*H*-pyran-3(6*H*)-one (**1**) (57.1 mg, 0.25 mmol) in  $\text{CH}_2\text{Cl}_2$  (1.0 mL) was added to the mixture by cannula transfer, and then a vessel was washed with  $\text{CH}_2\text{Cl}_2$  (1.0 mL x 3). The mixture was stirred at 35 °C for 20 h, and then filtered through a plug of Celite with EtOAc (30 mL). The solvent was removed in vacuo, and the residue was purified by silica gel column chromatography (20 g) with  $\text{CH}_2\text{Cl}_2/\text{EtOAc}$  (97 : 3, v/v) to give cycloadducts **3a** (48.2 mg, 71%, *endo* : *exo* = 81 : 19) as colorless oil. Dimer **4** (5.5 mg, 13%) was obtained by the same column chromatography with  $\text{CH}_2\text{Cl}_2/\text{EtOAc}$  (80 : 20, v/v) as an eluent.

***endo*- and *exo*-5-Acetoxymethyl-6-phenyl-8-oxabicyclo[3.2.1]oct-3-en-2-one (*endo*-**3a** and *exo*-**

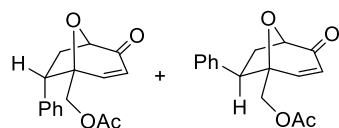

**3a**).<sup>3</sup>  $R_f$  = 0.29 (Hexane/EtOAc, 67 : 33, v/v); IR (KBr) 1747, 1704, 1228,

1050, 772, 713  $\text{cm}^{-1}$ ;  $^1\text{H}$  NMR (500 MHz,  $\text{CDCl}_3$ )  $\delta$  2.02 (3H x 19/100, s),

2.08 (1H x 81/100,  $J$  = 1.5, 6.9, 13.8 Hz), 2.10 (3H x 81/100, s), 2.45 (1H x

19/100, ddd,  $J$  = 1.8, 9.0, 14.1 Hz), 2.59 (1H x 19/100, ddd,  $J$  = 3.3, 8.7, 14.1 Hz), 2.99 (1H x 81/100,

ddd,  $J$  = 8.7, 10.2, 13.8 Hz), 3.42 (1H x 19/100, dd,  $J$  = 3.3, 9.0 Hz), 3.55 (1H x 81/100, dd,  $J$  = 6.9,

10.2 Hz), 3.65 (1H x 19/100, d,  $J$  = 12.0 Hz), 4.07 (1H x 19/100, d,  $J$  = 12.0 Hz), 4.25 (1H x 81/100, d,

$J$  = 12.0 Hz), 4.52 (1H x 81/100, d,  $J$  = 12.0 Hz), 4.70 (1H x 81/100, ddd,  $J$  = 1.5, 1.5, 8.7 Hz), 4.83 (1H

x 19/100, ddd,  $J$  = 1.2, 1.8, 8.7 Hz), 6.11 (1H x 19/100, dd,  $J$  = 1.2, 9.9 Hz), 6.29 (1H x 81/100, dd,  $J$  =

1.5, 9.9 Hz), 6.65 (1H x 81/100, d,  $J$  = 9.9 Hz), 7.13-7.16 (2H x 81/100, m), 7.21-7.34 (3H x 81/100 +

6H x 19/100, m);  $^{13}\text{C}$  NMR (125 MHz,  $\text{CDCl}_3$ )  $\delta$  20.5 ( $\text{CH}_3$ , *exo*), 20.6 ( $\text{CH}_3$ , *endo*), 33.7 ( $\text{CH}_2$ , *endo*),

36.3 ( $\text{CH}_2$ , *exo*), 49.1 ( $\text{CH}$ , *exo*), 49.7 ( $\text{CH}$ , *endo*), 64.9 ( $\text{CH}_2$ , *endo*), 65.2 ( $\text{CH}_2$ , *exo*), 80.8 ( $\text{CH}$ , *endo*),

81.4 ( $\text{CH}$ , *exo*), 83.6 (C, *endo*), 84.2 (C, *exo*), 126.1 ( $\text{CH}$ , *exo*), 127.5 ( $\text{CH}$ , *exo*), 127.7 ( $\text{CH}$ , *endo*),

128.2 ( $\text{CH}$ , *exo*), 128.60 ( $\text{CH}$  x 2, *endo*), 128.65 ( $\text{CH}$ , *exo*), 128.67 ( $\text{CH}$ , *endo*), 136.0 (C, *endo*), 139.4

(C, *exo*), 150.9 ( $\text{CH}$ , *endo*), 152.9 ( $\text{CH}$ , *exo*), 170.2 (C, *exo*), 170.5 (C, *endo*), 196.0 (C, *endo*), 196.1 (C,

*exo*); HRMS (ESI) Exact mass calcd for  $\text{C}_{16}\text{H}_{16}\text{O}_4\text{Na}$  [ $\text{M}+\text{Na}$ ]<sup>+</sup> 295.0941, Found: 295.0944.

The stereochemistry of cycloadducts **3a** – **3i** was determined by comparison with  $^1\text{H}$  NMR data reported for **3a** and **3i** in the literature.<sup>3</sup>

**endo- and exo-5-Acetoxymethyl-6-(4-chlorophenyl)-8-oxabicyclo[3.2.1]oct-3-en-2-one (endo-3b and exo-3b).**

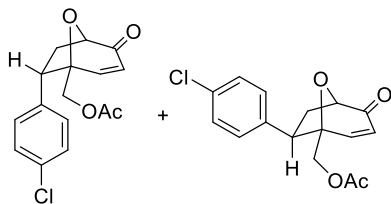

Isolated as yellow oil (53.2 mg, 69%, *endo* : *exo* = 86 : 14) after silica gel column chromatography (12 g, eluent: Hexane/EtOAc (80 : 20, v/v)) following the general procedure (24 h) using *p*-chlorostyrene (**2b**) (150  $\mu$ L, 1.25 mmol, 5.0 equiv).  $R_f$  = 0.31

(*endo*), 0.22 (*exo*) (Hexane/EtOAc, 67 : 33, v/v); IR (neat) 3022, 1745, 1706, 1495, 1230, 1049, 824, 756  $\text{cm}^{-1}$ ;  $^1\text{H}$  NMR (300 MHz,  $\text{CDCl}_3$ )  $\delta$  2.01 (1H x 86/100, ddd,  $J$  = 1.8, 6.9, 13.8 Hz), 2.03 (3H x 14/100, s), 2.10 (3H x 86/100, s), 2.42-2.57 (2H x 14/100, m), 3.00 (1H x 86/100, ddd,  $J$  = 8.7, 10.2, 13.8 Hz), 3.40 (1H x 14/100, dd,  $J$  = 3.9, 8.1 Hz), 3.54 (1H x 86/100, dd,  $J$  = 6.9, 10.2 Hz), 3.68 (1H x 14/100, d,  $J$  = 12.0 Hz), 4.02 (1H x 14/100, d,  $J$  = 12.0 Hz), 4.23 (1H x 86/100, d,  $J$  = 12.0 Hz), 4.49 (1H x 86/100, d,  $J$  = 12.0 Hz), 4.69 (1H x 86/100, ddd,  $J$  = 1.5, 1.8, 8.7 Hz), 4.82 (1H x 14/100, ddd,  $J$  = 1.2, 2.7, 7.8 Hz), 6.11 (1H x 14/100, dd,  $J$  = 1.2, 9.9 Hz), 6.29 (1H x 86/100, dd,  $J$  = 1.5, 9.9 Hz), 6.64 (1H x 86/100, d,  $J$  = 9.9 Hz), 7.07-7.32 (4H x 86/100 + 5H x 14/100, m);  $^{13}\text{C}$  NMR (125 MHz,  $\text{CDCl}_3$ )  $\delta$  20.5 ( $\text{CH}_3$ , *exo*), 20.6 ( $\text{CH}_3$ , *endo*), 33.7 ( $\text{CH}_2$ , *endo*), 36.4 ( $\text{CH}_2$ , *exo*), 48.5 ( $\text{CH}$ , *exo*), 49.1 ( $\text{CH}$ , *endo*), 64.6 ( $\text{CH}_2$ , *endo*), 65.0 ( $\text{CH}_2$ , *exo*), 80.8 ( $\text{CH}$ , *endo*), 81.3 ( $\text{CH}$ , *exo*), 83.4 ( $\text{C}$ , *endo*), 84.0 ( $\text{C}$ , *exo*), 126.2 ( $\text{CH}$ , *exo*), 128.75 ( $\text{CH}$ , *endo*), 128.81 ( $\text{CH}$ , *exo*), 128.9 ( $\text{CH}$ , *endo*), 129.5 ( $\text{CH}$ , *exo*), 129.9 ( $\text{CH}$ , *endo*), 133.4 ( $\text{C}$ , *exo*), 133.6 ( $\text{C}$ , *endo*), 134.6 ( $\text{C}$ , *endo*), 138.0 ( $\text{C}$ , *exo*), 150.4 ( $\text{CH}$ , *endo*), 152.5 ( $\text{CH}$ , *exo*), 170.1 ( $\text{C}$ , *exo*), 170.4 ( $\text{C}$ , *endo*), 195.75 ( $\text{C}$ , *endo*), 195.79 ( $\text{C}$ , *exo*); HRMS (ESI) Exact mass calcd for  $\text{C}_{16}\text{H}_{15}\text{ClNaO}_4$   $[\text{M}+\text{Na}]^+$  329.0551, found 329.0554.

**endo- and exo-5-Acetoxymethyl-6-[4-(methoxycarbonyl)phenyl]-8-oxabicyclo[3.2.1]oct-3-en-2-one (endo-3c and exo-3c).**

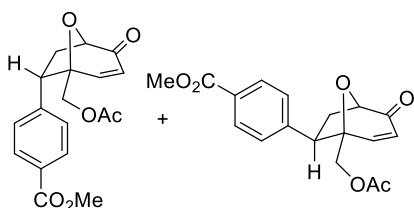

Isolated as yellow oil (55.7 mg, 67%, *endo* : *exo* = 78 : 22) after silica gel column chromatography (15 g, eluent: Hexane/EtOAc (60 : 40, v/v)) following the general procedure (20 h) using *p*-(methoxycarbonyl)styrene (**2c**) (230 mg, 1.25 mmol, 5.0 equiv).

Before addition of *N,N*-diisopropylethylamine, a solution of styrene **2c** in  $\text{CH}_2\text{Cl}_2$  (1.0 mL) was added into a Schlenk tube. A vessel used for cannula transfer of **1** was washed with  $\text{CH}_2\text{Cl}_2$  (0.67 mL x 3).  $R_f$  = 0.19 (*endo*), 0.13 (*exo*) (Hexane/EtOAc, 67 : 33, v/v); IR (KBr) 1720, 1283, 1229, 1112,



1050, 849, 777, 718  $\text{cm}^{-1}$ ;  $^1\text{H}$  NMR (300 MHz,  $\text{CDCl}_3$ )  $\delta$  2.02 (3H x 22/100, s), 2.09 (1H x 78/100, m), 2.10 (3H x 78/100, s), 2.47 (1H x 22/100, ddd,  $J = 2.1, 9.0, 14.1$  Hz), 2.59 (1H x 22/100, ddd,  $J = 3.3, 8.4, 14.1$  Hz), 3.02 (1H x 78/100, ddd,  $J = 8.7, 10.2, 13.8$  Hz), 3.48 (1H x 22/100, dd,  $J = 3.3, 9.0$  Hz), 3.63 (1H x 78/100, dd,  $J = 6.9, 10.2$  Hz), 3.68 (1H x 22/100, d,  $J = 12.0$  Hz), 3.92 (3H x 78/100, s), 3.92 (3H x 22/100, s), 4.00 (1H x 22/100, d,  $J = 12.0$  Hz), 4.25 (1H x 78/100, d,  $J = 12.0$  Hz), 4.50 (1H x 78/100, d,  $J = 12.0$  Hz), 4.72 (1H x 78/100, ddd,  $J = 1.2, 1.5, 8.7$  Hz), 4.86 (1H x 22/100, ddd,  $J = 1.2, 2.1, 8.4$  Hz), 6.13 (1H x 22/100, dd,  $J = 1.2, 9.9$  Hz), 6.31 (1H x 78/100, dd,  $J = 1.2, 9.9$  Hz), 6.62 (1H x 78/100, d,  $J = 9.9$  Hz), 7.22-7.32 (2H x 78/100 + 3H x 22/100, m), 7.95-8.02 (2H x 78/100 + 2H x 22/100, m);  $^{13}\text{C}$  NMR (125 MHz,  $\text{CDCl}_3$ )  $\delta$  20.5 ( $\text{CH}_3$ , *exo*), 20.6 ( $\text{CH}_3$ , *endo*), 33.6 ( $\text{CH}_2$ , *endo*), 36.3 ( $\text{CH}_2$ , *exo*), 49.0 ( $\text{CH}$ , *exo*), 49.7 ( $\text{CH}$ , *endo*), 52.08 ( $\text{CH}_3$ , *exo*), 52.12 ( $\text{CH}_3$ , *endo*), 64.6 ( $\text{CH}_2$ , *endo*), 64.7 ( $\text{CH}_2$ , *exo*), 80.8 ( $\text{CH}$ , *endo*), 81.3 ( $\text{CH}$ , *exo*), 83.5 ( $\text{C}$ , *endo*), 84.0 ( $\text{C}$ , *exo*), 126.3 ( $\text{CH}$ , *exo*), 128.3 ( $\text{CH}$ , *exo*), 128.7 ( $\text{CH}$ , *endo*), 128.9 ( $\text{CH}$ , *endo*), 129.4 ( $\text{C}$ , *exo*), 129.6 ( $\text{C}$ , *endo*), 129.7 ( $\text{CH}$ , *endo*), 129.9 ( $\text{CH}$ , *exo*), 141.4 ( $\text{C}$ , *endo*), 144.8 ( $\text{C}$ , *exo*), 150.3 ( $\text{CH}$ , *endo*), 152.4 ( $\text{CH}$ , *exo*), 166.4 ( $\text{C}$ , *endo*), 166.5 ( $\text{C}$ , *exo*), 170.0 ( $\text{C}$ , *exo*), 170.4 ( $\text{C}$ , *endo*), 195.70 ( $\text{C}$ , *endo*), 195.73 ( $\text{C}$ , *exo*); HRMS (ESI) Exact mass calcd for  $\text{C}_{18}\text{H}_{18}\text{NaO}_6$   $[\text{M}+\text{Na}]^+$  353.0996, found 353.1004.

***endo*- and *exo*-5-Acetoxymethyl-6-(4-cyanophenyl)-8-oxabicyclo[3.2.1]oct-3-en-2-one (*endo*-3d**

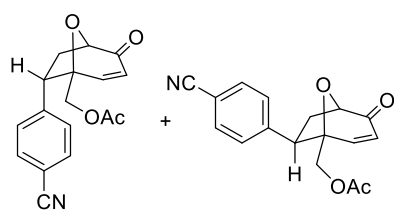

**and *exo*-3d).** Isolated as yellow oil (39.5 mg, 53%, *endo* : *exo* = 84 : 16) after silica gel column chromatography (20 g, eluent:  $\text{CH}_2\text{Cl}_2/\text{EtOAc}$  (90 : 10, v/v) and then  $\text{CH}_2\text{Cl}_2/\text{EtOAc}$  (97 : 3, v/v)) following the general procedure (20 h) using *p*-cyanostyrene (**2d**) (161

mg, 1.25 mmol, 5.0 equiv). Before addition of *N,N*-diisopropylethylamine, a solution of styrene **2d** in  $\text{CH}_2\text{Cl}_2$  (1.0 mL) was added into a Schlenk tube. A vessel used for cannula transfer of **1** was washed with  $\text{CH}_2\text{Cl}_2$  (0.67 mL x 3).  $R_f = 0.28$  ( $\text{CH}_2\text{Cl}_2/\text{EtOAc}$ , 95 : 5, v/v); IR (KBr) 2228, 1743, 1706, 1230, 1050, 834  $\text{cm}^{-1}$ ;  $^1\text{H}$  NMR (300 MHz,  $\text{CDCl}_3$ )  $\delta$  2.02 (3H x 16/100, s), 2.05 (1H x 84/100, ddd,  $J = 1.8, 6.9, 13.8$  Hz), 2.10 (3H x 84/100, s), 2.49-2.54 (2H x 16/100, m), 3.04 (1H x 84/100, ddd,  $J = 8.7, 10.2, 13.8$  Hz), 3.48 (1H x 16/100, dd,  $J = 4.5, 7.8$  Hz), 3.63 (1H x 84/100, dd,  $J = 6.9, 10.2$  Hz), 3.70 (1H x 16/100, d,  $J = 12.0$  Hz), 3.97 (1H x 16/100, d,  $J = 12.0$  Hz), 4.24 (1H x 84/100, d,  $J = 12.0$  Hz), 4.49 (1H

x 84/100, d,  $J = 12.0$  Hz), 4.72 (1H x 84/100, ddd,  $J = 1.5, 1.8, 8.7$  Hz), 4.85 (1H x 16/100, m), 6.14 (1H x 16/100, dd,  $J = 1.2, 9.9$  Hz), 6.32 (1H x 84/100, dd,  $J = 1.5, 9.9$  Hz), 6.62 (1H x 84/100, d,  $J = 9.9$  Hz), 7.25 (1H x 16/100, d,  $J = 9.9$  Hz), 7.27-7.38 (2H x 84/100 + 2H x 16/100, m), 7.59-7.65 (2H x 84/100 + 2H x 16/100, m);  $^{13}\text{C}$  NMR (125 MHz,  $\text{CDCl}_3$ )  $\delta$  20.4 ( $\text{CH}_3$ , *exo*), 20.6 ( $\text{CH}_3$ , *endo*), 33.7 ( $\text{CH}_2$ , *endo*), 36.4 ( $\text{CH}_2$ , *exo*), 49.1 ( $\text{CH}$ , *exo*), 49.8 ( $\text{CH}$ , *endo*), 64.3 ( $\text{CH}_2$ , *endo*), 64.5 ( $\text{CH}_2$ , *exo*), 80.8 ( $\text{CH}$ , *endo*), 81.2 ( $\text{CH}$ , *exo*), 83.5 (C, *endo*), 84.0 (C, *exo*), 111.5 (C, *exo*), 111.8 (C, *endo*), 118.2 (C, *endo*), 118.3 (C, *exo*), 126.4 ( $\text{CH}$ , *exo*), 129.1 ( $\text{CH}$ , *exo*), 129.2 ( $\text{CH}$ , *endo*), 129.5 ( $\text{CH}$ , *endo*), 132.3 ( $\text{CH}$ , *endo*), 132.4 ( $\text{CH}$ , *exo*), 141.8 (C, *endo*), 145.2 (C, *exo*), 149.7 ( $\text{CH}$ , *endo*), 151.9 ( $\text{CH}$ , *exo*), 169.9 (C, *exo*), 170.3 (C, *endo*), 195.4 (C, *endo*, *exo*); HRMS (ESI) Exact mass calcd for  $\text{C}_{17}\text{H}_{15}\text{NNaO}_4$   $[\text{M}+\text{Na}]^+$  320.0893, found 320.0895.

***endo*- and *exo*-5-Acetoxymethyl-6-(4-methylphenyl)-8-oxabicyclo[3.2.1]oct-3-en-2-one (*endo*-3e**

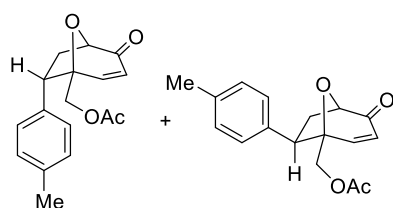

**and *exo*-3e).** Isolated as colorless needles (53.6 mg, 75%, *endo* : *exo* = 82 : 18) after silica gel column chromatography (10 g, eluent:  $\text{CH}_2\text{Cl}_2/\text{EtOAc}$  (95 : 5, v/v) and then  $\text{CH}_2\text{Cl}_2/\text{EtOAc}$  (97 : 3, v/v)) following the general procedure (24 h) using *p*-methylstyrene (**2e**) (165

$\mu\text{L}$ , 1.25 mmol, 5.0 equiv).  $R_f = 0.34$  (*endo*), 0.31 (*exo*) ( $\text{CH}_2\text{Cl}_2/\text{EtOAc}$ , 95 : 5, v/v); IR (KBr) 2979, 1744, 1704, 1230, 1030, 816  $\text{cm}^{-1}$ ;  $^1\text{H}$  NMR (300 MHz,  $\text{CDCl}_3$ )  $\delta$  2.02 (3H x 18/100, s), 2.05 (1H x 82/100, ddd,  $J = 1.8, 6.9, 13.8$  Hz), 2.10 (3H x 82/100, s), 2.32 (3H x 82/100, s), 2.33 (3H x 18/100, s), 2.43 (1H x 18/100, ddd,  $J = 2.1, 9.0, 14.1$  Hz), 2.56 (1H x 18/100, ddd,  $J = 3.3, 8.7, 14.1$  Hz), 2.97 (1H x 82/100, ddd,  $J = 8.7, 10.2, 13.8$  Hz), 3.38 (1H x 18/100, dd,  $J = 3.3, 9.0$  Hz), 3.51 (1H x 82/100, dd,  $J = 6.9, 10.2$  Hz), 3.64 (1H x 18/100, d,  $J = 12.0$  Hz), 4.06 (1H x 18/100, d,  $J = 12.0$  Hz), 4.24 (1H x 82/100, d,  $J = 12.0$  Hz), 4.51 (1H x 82/100, d,  $J = 12.0$  Hz), 4.68 (1H x 82/100, ddd,  $J = 1.5, 1.8, 8.7$  Hz), 4.82 (1H x 18/100, ddd,  $J = 1.5, 2.1, 8.7$  Hz), 6.09 (1H x 18/100, dd,  $J = 1.5, 9.9$  Hz), 6.28 (1H x 82/100, dd,  $J = 1.5, 9.9$  Hz), 6.65 (1H x 82/100, d,  $J = 9.9$  Hz), 7.01-7.12 (4H x 82/100 + 4H x 18/100, m), 7.25 (1H x 18/100, d,  $J = 9.9$  Hz);  $^{13}\text{C}$  NMR (125 MHz,  $\text{CDCl}_3$ )  $\delta$  20.6 ( $\text{CH}_3$ , *exo*), 20.7 ( $\text{CH}_3$ , *endo*), 20.9 ( $\text{CH}_3$ , *endo*), 21.0 ( $\text{CH}_3$ , *exo*), 33.7 ( $\text{CH}_2$ , *endo*), 36.3 ( $\text{CH}_2$ , *exo*), 48.7 ( $\text{CH}$ , *exo*), 49.3 ( $\text{CH}$ , *endo*), 65.0 ( $\text{CH}_2$ , *endo*), 65.4 ( $\text{CH}_2$ , *exo*), 80.9 ( $\text{CH}$ , *endo*), 81.4 ( $\text{CH}$ , *exo*), 83.5 (C, *endo*), 84.2 (C, *exo*), 126.1

(CH, *exo*), 128.1 (CH, *exo*), 128.5 (CH, *endo*), 128.6 (CH, *endo*), 129.26 (CH, *endo*), 129.33 (CH, *exo*), 132.9 (C, *endo*), 136.3 (C, *exo*), 137.2 (C, *exo*), 137.5 (C, *endo*), 151.1 (CH, *endo*), 153.0 (CH, *exo*), 170.3 (C, *exo*), 170.6 (C, *endo*), 196.1 (C, *endo*), 196.2 (C, *exo*); HRMS (ESI) Exact mass calcd for C<sub>17</sub>H<sub>18</sub>NaO<sub>4</sub> [M+Na]<sup>+</sup> 309.1097, found 309.1106.

***endo*- and *exo*-5-Acetoxymethyl-6-(4-methoxyphenyl)-8-oxabicyclo[3.2.1]oct-3-en-2-one (*endo*-**

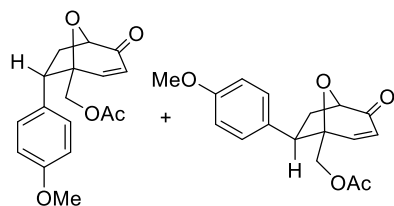

**3f and *exo*-3f**). Isolated as yellow oil (60.7 mg, 80%, *endo* : *exo* = 88 :

12) after silica gel column chromatography (20 g, eluent: Hexane/EtOAc (80 : 20, v/v)) following the general procedure (20 h) using *p*-methoxystyrene (**2f**) (166  $\mu$ L, 1.25 mmol, 5.0 equiv). R<sub>f</sub> = 0.27

(*endo*), 0.21 (*exo*) (Hexane/EtOAc, 67 : 33, v/v); IR (KBr) 1744, 1703, 1515, 1253, 1031, 832 cm<sup>-1</sup>, <sup>1</sup>H NMR (300 MHz, CDCl<sub>3</sub>)  $\delta$  2.02 (1H x 88/100, ddd, *J* = 1.8, 6.9, 13.8 Hz), 2.03 (3H x 12/100, s), 2.10 (3H x 88/100, s), 2.43 (1H x 12/100, ddd, *J* = 2.1, 8.7, 14.1 Hz), 2.54 (1H x 12/100, ddd, *J* = 3.6, 8.4, 14.1 Hz), 2.97 (1H x 88/100, ddd, *J* = 8.7, 10.2, 13.8 Hz), 3.38 (1H x 12/100, dd, *J* = 3.6, 8.7 Hz), 3.50 (1H x 88/100, dd, *J* = 6.9, 10.2 Hz), 3.64 (1H x 12/100, d, *J* = 12.0 Hz), 3.79 (3H x 88/100, s), 3.80 (3H x 12/100, s), 4.06 (1H x 12/100, d, *J* = 12.0 Hz), 4.23 (1H x 88/100, d, *J* = 12.0 Hz), 4.50 (1H x 88/100, d, *J* = 12.0 Hz), 4.67 (1H x 88/100, ddd, *J* = 1.2, 1.8, 8.7 Hz), 4.81 (1H x 12/100, ddd, *J* = 1.2, 2.1, 8.4 Hz), 6.09 (1H x 12/100, dd, *J* = 1.2, 9.9 Hz), 6.28 (1H x 88/100, dd, *J* = 1.2, 9.9 Hz), 6.66 (1H x 88/100, d, *J* = 9.9 Hz), 6.80-6.87 (2H x 88/100 + 2H x 12/100, m), 7.04-7.08 (2H x 88/100, m), 7.12-7.15 (2H x 12/100, m), 7.25 (1H x 12/100, d, *J* = 9.9 Hz); <sup>13</sup>C NMR (125 MHz, CDCl<sub>3</sub>)  $\delta$  20.5 (CH<sub>3</sub>, *exo*), 20.6 (CH<sub>3</sub>, *endo*), 33.8 (CH<sub>2</sub>, *endo*), 36.3 (CH<sub>2</sub>, *exo*), 48.3 (CH, *exo*), 48.9 (CH, *endo*), 55.2 (CH<sub>3</sub>, *endo*, *exo*), 64.9 (CH<sub>2</sub>, *endo*), 65.4 (CH<sub>2</sub>, *exo*), 80.8 (CH, *endo*), 81.4 (CH, *exo*), 83.5 (C, *endo*), 84.2 (C, *exo*), 113.9 (CH, *endo*), 114.0 (CH, *exo*), 126.0 (CH, *exo*), 127.8 (C, *endo*), 128.6 (CH, *endo*), 129.2 (CH, *exo*), 129.6 (CH, *endo*), 131.3 (C, *exo*), 151.1 (CH, *endo*), 153.0 (CH, *exo*), 158.9 (C, *exo*), 159.0 (C, *endo*), 170.2 (C, *exo*), 170.5 (C, *endo*), 196.0 (C, *endo*), 196.1 (C, *exo*); HRMS (ESI) Exact mass calcd for C<sub>17</sub>H<sub>18</sub>NaO<sub>5</sub> [M+Na]<sup>+</sup> 325.1046, found 325.1050.

***endo*- and *exo*-5-Acetoxymethyl-6-(3-methoxyphenyl)-8-oxabicyclo[3.2.1]oct-3-en-2-one (*endo*-**

**3g and *exo*-3g**). Isolated as yellow oil (57.0 mg, 75%, *endo* : *exo* = 81 : 19) after silica gel column

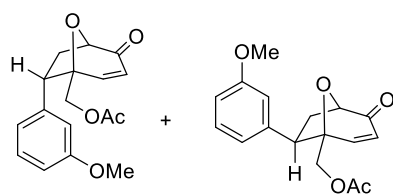

chromatography (15 g, eluent: Hexane/EtOAc (80 : 20, v/v)) following the general procedure (24 h) using *m*-methoxystyrene (**2g**) (173  $\mu$ L, 1.25 mmol, 5.0 equiv).  $R_f$  = 0.25 (*endo*), 0.19 (*exo*) (Hexane/EtOAc, 67 : 33, v/v); IR (neat) 1743, 1231, 1046, 906, 786, 754, 698  $\text{cm}^{-1}$ ;  $^1\text{H}$

NMR (300 MHz,  $\text{CDCl}_3$ )  $\delta$  2.03 (3H x 19/100, s), 2.06 (1H x 81/100, ddd,  $J$  = 1.8, 6.9, 13.8 Hz), 2.10 (1H x 81/100, s), 2.43 (1H x 19/100, ddd,  $J$  = 1.8, 9.0, 14.1 Hz), 2.59 (1H x 19/100, ddd,  $J$  = 3.3, 8.7, 14.1 Hz), 2.98 (1H x 81/100, ddd,  $J$  = 8.7, 10.2, 13.8 Hz), 3.38 (1H x 19/100, dd,  $J$  = 3.3, 9.0 Hz), 3.52 (1H x 81/100, dd,  $J$  = 6.9, 10.2 Hz), 3.69 (1H x 19/100, d,  $J$  = 12.0 Hz), 3.78 (3H x 81/100, s), 3.81 (3H x 19/100, s), 4.12 (1H x 19/100, d,  $J$  = 12.0 Hz), 4.25 (1H x 81/100, d,  $J$  = 12.0 Hz), 4.52 (1H x 81/100, d,  $J$  = 12.0 Hz), 4.68 (1H x 81/100, ddd,  $J$  = 1.5, 1.8, 8.7 Hz), 4.82 (1H x 19/100, ddd,  $J$  = 1.2, 1.8, 8.7 Hz), 6.10 (1H x 19/100, dd,  $J$  = 1.2, 9.9 Hz), 6.28 (1H x 81/100, dd,  $J$  = 1.5, 9.9 Hz), 6.68 (1H x 81/100, d,  $J$  = 9.9 Hz), 6.66-6.83 (3H x 81/100 + 4H x 19/100, m), 7.19-7.27 (1H x 81/100 + 1H x 19/100, m);  $^{13}\text{C}$  NMR (125 MHz,  $\text{CDCl}_3$ )  $\delta$  20.5 ( $\text{CH}_3$ , *exo*), 20.6 ( $\text{CH}_3$ , *endo*), 33.6 ( $\text{CH}_2$ , *endo*), 36.1 ( $\text{CH}_2$ , *exo*), 49.1 ( $\text{CH}$ , *exo*), 49.6 ( $\text{CH}$ , *endo*), 55.1 ( $\text{CH}_3$ , *endo*, *exo*), 64.8 ( $\text{CH}_2$ , *endo*), 65.2 ( $\text{CH}_2$ , *exo*), 80.8 ( $\text{CH}$ , *endo*), 81.4 ( $\text{CH}$ , *exo*), 83.5 ( $\text{C}$ , *endo*), 84.1 ( $\text{C}$ , *exo*), 112.3 ( $\text{CH}$ , *exo*), 112.4 ( $\text{CH}$ , *endo*), 114.4 ( $\text{CH}$ , *exo*), 114.9 ( $\text{CH}$ , *endo*), 120.6 ( $\text{CH}$ , *exo*), 120.9 ( $\text{CH}$ , *endo*), 126.1 ( $\text{CH}$ , *exo*), 128.5 ( $\text{CH}$ , *endo*), 129.59 ( $\text{CH}$ , *endo*), 129.63 ( $\text{CH}$ , *exo*), 137.7 ( $\text{C}$ , *endo*), 141.0 ( $\text{C}$ , *exo*), 150.9 ( $\text{CH}$ , *endo*), 152.9 ( $\text{CH}$ , *exo*), 159.57 ( $\text{C}$ , *endo*), 159.62 ( $\text{C}$ , *exo*), 170.2 ( $\text{C}$ , *exo*), 170.5 ( $\text{C}$ , *endo*), 196.0 ( $\text{C}$ , *endo*), 196.1 ( $\text{C}$ , *exo*); HRMS (ESI) Exact mass calcd for  $\text{C}_{17}\text{H}_{18}\text{NaO}_5$  [ $\text{M}+\text{Na}$ ] $^+$  325.1046, found 325.1048.

***endo*- and *exo*-5-Acetoxymethyl-6-(2-methoxyphenyl)-8-oxabicyclo[3.2.1]oct-3-en-2-one (*endo*-**

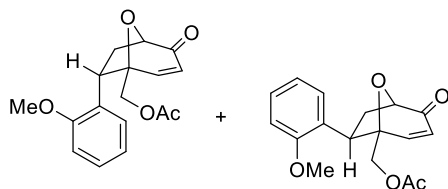

**3h and *exo*-3h**). Isolated as colorless prisms (60.9 mg, 80%, *endo* : *exo* = 85 : 15) after silica gel column chromatography (10 g, eluent: Hexane/EtOAc (80 : 20, v/v) and then  $\text{CH}_2\text{Cl}_2/\text{EtOAc}$  (92 : 8, v/v)) following the general procedure (22 h) using *o*-

methoxystyrene (**2h**) (166  $\mu$ L, 1.25 mmol, 5.0 equiv).  $R_f$  = 0.28 ( $\text{CH}_2\text{Cl}_2/\text{EtOAc}$ , 67 : 33, v/v); IR (KBr) 2976, 1735, 1701, 1493, 1251, 1037, 888, 755, 448  $\text{cm}^{-1}$ ;  $^1\text{H}$  NMR (500 MHz,  $\text{CDCl}_3$ )  $\delta$  2.01 (3H x 15/100, s), 2.03 (1H x 85/100, ddd,  $J$  = 1.5, 7.0, 13.5 Hz), 2.09 (3H x 85/100, s), 2.36 (1H x 15/100, ddd,

$J = 1.5, 9.5, 14.0$  Hz), 2.57 (1H x 15/100, ddd,  $J = 3.5, 9.0, 14.0$  Hz), 2.91 (1H x 85/100, ddd,  $J = 9.0, 10.5, 13.5$  Hz), 3.58 (1H x 15/100, d,  $J = 12.0$  Hz), 3.84 (3H x 15/100, s), 3.85 (3H x 85/100, s), 4.11 (1H x 15/100, m), 4.19 (1H x 85/100, dd,  $J = 7.0, 10.5$  Hz), 4.20 (1H x 15/100, d,  $J = 12.0$  Hz), 4.30 (1H x 85/100, d,  $J = 12.5$  Hz), 4.46 (1H x 85/100, d,  $J = 12.5$  Hz), 4.71 (1H x 85/100, ddd,  $J = 1.5, 1.5, 9.0$  Hz), 4.83 (1H x 15/100, ddd,  $J = 1.0, 1.5, 9.0$  Hz), 6.09 (1H x 15/100, dd,  $J = 1.0, 10.0$  Hz), 6.26 (1H x 85/100, dd,  $J = 1.5, 10.0$  Hz), 6.66 (1H x 85/100, d,  $J = 10.0$  Hz), 6.86-6.90 (1H x 15/100 + 2H x 85/100, m), 6.97 (1H x 15/100, m), 7.01 (1H x 85/100, m), 7.21-7.26 (2H x 15/100 + 1H x 85/100, m), 7.28 (1H x 15/100, d,  $J = 10.0$  Hz);  $^{13}\text{C}$  NMR (125 MHz,  $\text{CDCl}_3$ )  $\delta$  20.6 ( $\text{CH}_3$ , *exo*), 20.7 ( $\text{CH}_3$ , *endo*), 33.4 ( $\text{CH}_2$ , *endo*), 35.3 ( $\text{CH}_2$ , *exo*), 39.5 ( $\text{CH}$ , *exo*), 40.8 ( $\text{CH}$ , *endo*), 55.4 ( $\text{CH}_3$ , *endo*), 55.5 ( $\text{CH}_3$ , *exo*), 65.2 ( $\text{CH}_2$ , *exo*), 65.9 ( $\text{CH}_2$ , *endo*), 81.3 ( $\text{CH}$ , *endo*), 81.6 ( $\text{CH}$ , *exo*), 84.1 ( $\text{C}$ , *endo*), 84.4 ( $\text{C}$ , *exo*), 110.4 ( $\text{CH}$ , *exo*), 110.5 ( $\text{CH}$ , *endo*), 120.4 ( $\text{CH}$ , *endo*), 121.0 ( $\text{CH}$ , *exo*), 124.1 ( $\text{C}$ , *endo*), 126.0 ( $\text{CH}$ , *endo*), 127.3 ( $\text{C}$ , *exo*), 128.4 ( $\text{CH} \times 3$ , *exo*), 128.5 ( $\text{CH} \times 2$ , *endo*), 152.0 ( $\text{CH}$ , *endo*), 153.6 ( $\text{CH}$ , *exo*), 156.7 ( $\text{C}$ , *exo*), 157.6 ( $\text{C}$ , *endo*), 170.4 ( $\text{C}$ , *exo*), 170.7 ( $\text{C}$ , *endo*), 196.4 ( $\text{C}$ , *endo*), 196.5 ( $\text{C}$ , *exo*); HRMS (ESI) Exact mass calcd for  $\text{C}_{17}\text{H}_{18}\text{NaO}_5$  [ $\text{M}+\text{Na}$ ] $^+$  325.1046, found 325.1040.

***endo*- and *exo*-5-Acetoxymethyl-6-[(6-*t*-butyldimethylsilyloxy-3,5-dimethoxy)phenyl]-8-oxabicyclo[3.2.1]oct-3-en-2-one (*endo*-**3i** and *exo*-**3i**).**<sup>3</sup> Isolated as colorless prisms (91.6 mg, 79%, *endo* : *exo* = 92 : 8) after silica gel column chromatography (15 g, eluent: Hexane/EtOAc (80 : 20, v/v) and then  $\text{CH}_2\text{Cl}_2/\text{EtOAc}$  (95 : 5, v/v)) following the general procedure (20 h) using (6-*t*-butyldimethylsilyloxy-3,5-dimethoxy)styrene (**2i**) (368 mg, 1.25 mmol, 5.0 equiv). Cycloadducts *endo*-**3i** and *exo*-**3i** could be separated by careful silica gel column chromatography (eluent: Hexane/EtOAc (90 : 10 – 80 : 20, v/v)).

***endo*-5-Acetoxymethyl-6-[(6-*t*-butyldimethylsilyloxy-3,5-dimethoxy)phenyl]-8-oxabicyclo[3.2.1]-oct-3-en-2-one (*endo*-**3i**).**  $R_f = 0.32$  (Hexane/EtOAc, 67 : 33, v/v); Colorless plates; mp 111 – 113 °C; IR ( $\text{CHCl}_3$ ) 1736, 1701, 1514, 1463, 1247, 1211, 1132, 776, 767, 751, 738, 669, 505  $\text{cm}^{-1}$ ;  $^1\text{H}$  NMR (500 MHz,  $\text{CDCl}_3$ )  $\delta$  0.11 (6H, s), 0.99 (9H, s), 2.01 (1H, ddd,  $J = 1.7, 7.1, 13.8$  Hz), 2.10 (3H, s), 2.96 (1H, ddd,  $J = 8.8, 10.2, 13.8$  Hz), 3.43 (1H, dd,  $J = 7.1, 10.2$  Hz), 3.74 (6H, s), 4.30 (1H, d,  $J = 12.0$  Hz), 4.48 (1H, d,  $J = 12.0$  Hz), 4.67

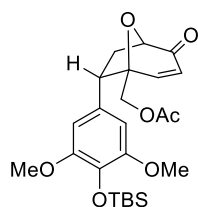

(1H, ddd,  $J = 1.1, 1.7, 8.8$  Hz), 6.26 (1H, dd,  $J = 1.1, 9.9$  Hz), 6.29 (2H, s), 6.69 (1H, d,  $J = 9.9$  Hz);  $^{13}\text{C}$  NMR (125 MHz,  $\text{CDCl}_3$ )  $\delta$  -4.6 (CH<sub>3</sub>), 18.7 (C), 20.8 (CH<sub>3</sub>), 25.7 (CH<sub>3</sub>), 33.9 (CH<sub>2</sub>), 49.9 (CH), 55.9 (CH<sub>3</sub>), 65.0 (CH<sub>2</sub>), 80.9 (CH), 83.6 (C), 105.8 (CH), 128.26 (C), 128.28 (CH), 134.1 (C), 151.48 (C), 151.55 (CH), 170.6 (C), 196.3 (C); HRMS (ESI) Exact mass calcd for C<sub>24</sub>H<sub>34</sub>O<sub>7</sub>SiNa [M+Na]<sup>+</sup> 485.1966, found 485.1965.

***exo*-5-Acetoxyethyl-6-[(6-*t*-butyldimethylsilyloxy-3,5-dimethoxy)phenyl]-8-oxabicyclo[3.2.1]-**

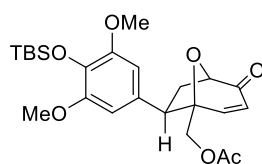

**oct-3-en-2-one (*exo*-3i).**  $R_f = 0.23$  (Hexane/EtOAc, 67 : 33, v/v); Colorless prisms; mp 122 – 123 °C; IR (KBr) 2955, 2930, 1747, 1706, 1588, 1514, 1465, 1249, 1223, 1129, 839, 783  $\text{cm}^{-1}$ ;  $^1\text{H}$  NMR (500 MHz,  $\text{CDCl}_3$ )  $\delta$  0.12 (6H, s),

1.00 (9H, s), 2.03 (3H, s), 2.40 (1H, ddd,  $J = 1.7, 9.1, 14.0$  Hz), 2.57 (1H, ddd,  $J = 3.3, 8.7, 14.0$  Hz), 3.32 (1H, dd,  $J = 3.3, 9.1$  Hz), 3.69 (1H, d,  $J = 12.3$  Hz), 3.78 (6H, s), 4.17 (1H, d,  $J = 12.3$  Hz), 4.81 (1H, ddd,  $J = 1.2, 1.7, 8.7$  Hz), 6.08 (1H, dd,  $J = 1.2, 9.9$  Hz), 6.38 (2H, s), 7.24 (1H, d,  $J = 9.9$  Hz);  $^{13}\text{C}$  NMR (125 MHz,  $\text{CDCl}_3$ )  $\delta$  -4.7 (CH<sub>3</sub>), 18.7 (C), 20.7 (CH<sub>3</sub>), 25.8 (CH<sub>3</sub>), 36.3 (CH<sub>2</sub>), 49.6 (CH), 55.9 (CH<sub>3</sub>), 65.4 (CH<sub>2</sub>), 81.5 (CH), 84.4 (C), 105.4 (CH), 126.2 (CH), 131.8 (C), 133.9 (C), 151.6 (C), 153.2 (CH), 170.3 (C), 196.2 (C); HRMS (ESI) Exact mass calcd for C<sub>24</sub>H<sub>34</sub>O<sub>7</sub>SiNa [M+Na]<sup>+</sup> 485.1966, found 485.1970.

***endo*-5-Acetoxyethyl-6-(1-propoxy)-8-oxabicyclo[3.2.1]oct-3-en-2-one (*endo*-6a).** Isolated as

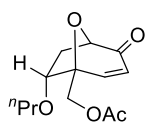

yellow oil (44.9 mg, 71%) after silica gel column chromatography (15 g, eluent: Hexane/EtOAc (80 : 20, v/v) and then 20 g, eluent: Hexane/EtOAc (80 : 20, v/v)) following the general procedure (40 h) using *n*-propyl vinyl ether (**5a**) (140  $\mu\text{L}$ , 1.25 mmol,

5.0 equiv) and *N,N*-diisopropylethylamine (8.71  $\mu\text{L}$ , 0.050 mmol, 0.2 equiv). A solution of 6-acetoxy-6-acetoxymethyl-2*H*-pyran-3(6*H*)-one (**1**) (57.1 mg, 0.25 mmol) in  $\text{CH}_2\text{Cl}_2$  (0.5 mL) was added to the mixture by cannula transfer, and then a vessel was washed with  $\text{CH}_2\text{Cl}_2$  (0.5 mL x 3).  $R_f = 0.33$  (Hexane/EtOAc, 67 : 33, v/v); IR (neat) 2965, 2877, 1745, 1703, 1230, 1083, 1049, 859  $\text{cm}^{-1}$ ;  $^1\text{H}$  NMR (300 MHz,  $\text{CDCl}_3$ )  $\delta$  0.87 (3H, t,  $J = 7.5$  Hz), 1.53 (2H, tq,  $J = 6.7, 7.5$  Hz), 1.67 (1H, ddd,  $J = 1.8, 4.2, 13.5$  Hz), 2.13 (3H, s), 2.73 (1H, ddd,  $J = 8.7, 8.7, 13.5$  Hz), 3.31-3.43 (2H, m), 4.08 (1H, dd,  $J = 4.2, 8.7$  Hz), 4.25 (1H, d,  $J = 12.0$  Hz), 4.49 (1H, ddd,  $J = 1.2, 1.8, 8.7$  Hz), 4.62 (1H, d,  $J = 12.0$  Hz), 6.21

(1H, dd,  $J = 1.2, 9.9$  Hz), 7.08 (1H, d,  $J = 9.9$  Hz);  $^{13}\text{C}$  NMR (125 MHz,  $\text{CDCl}_3$ )  $\delta$  10.4 ( $\text{CH}_3$ ), 20.7 ( $\text{CH}_3$ ), 22.8 ( $\text{CH}_2$ ), 33.0 ( $\text{CH}_2$ ), 65.0 ( $\text{CH}_2$ ), 72.8 ( $\text{CH}_2$ ), 80.7 (CH), 81.2 (C), 82.1 (CH), 128.0 (CH), 150.6 (CH), 170.6 (C), 196.2 (C); HRMS (ESI) Exact mass calcd for  $\text{C}_{13}\text{H}_{18}\text{NaO}_5$   $[\text{M}+\text{Na}]^+$  277.1046, found 277.1066.

The stereochemistry of cycloadducts **6a** – **6d** was determined by comparison with  $^1\text{H}$  NMR data reported for *endo*-5-(*t*-butyldimethylsilyloxy)methyl-6-ethoxy-8-oxabicyclo[3.2.1]oct-3-en-2-one in the literature.<sup>14</sup>

***endo*-5-Acetoxymethyl-6-ethoxy-8-oxabicyclo[3.2.1]oct-3-en-2-one (*endo*-6b).** Isolated as yellow

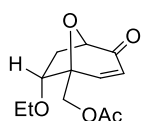

oil (39.0 mg, 65%) after silica gel column chromatography (15 g, eluent: Hexane/EtOAc (80 : 20, v/v)) following the general procedure (48 h) using ethyl vinyl ether (**5b**) (120  $\mu\text{L}$ , 1.25 mmol, 5.0 equiv) and *N,N*-diisopropylethylamine (8.71  $\mu\text{L}$ , 0.050 mmol, 0.2 equiv). A

solution of 6-acetoxy-6-acetoxymethyl-2*H*-pyran-3(6*H*)-one (**1**) (57.1 mg, 0.25 mmol) in  $\text{CH}_2\text{Cl}_2$  (0.5 mL) was added to the mixture by cannula transfer, and then a vessel was washed with  $\text{CH}_2\text{Cl}_2$  (0.5 mL x 3).  $R_f = 0.31$  (Hexane/EtOAc, 67 : 33, v/v); IR (neat) 2979, 2879, 1745, 1703, 1446, 1385, 1231, 1124, 1084, 1049, 903, 857  $\text{cm}^{-1}$ ;  $^1\text{H}$  NMR (300 MHz,  $\text{CDCl}_3$ )  $\delta$  1.15 (3H, t,  $J = 6.9$  Hz), 1.68 (1H, ddd,  $J = 1.5, 3.9, 13.5$  Hz), 2.13 (3H, s), 2.74 (1H, ddd,  $J = 8.7, 8.7, 13.5$  Hz), 3.40-3.56 (2H, m), 4.08 (1H, dd,  $J = 3.9, 8.7$  Hz), 4.25 (1H, d,  $J = 12.0$  Hz), 4.49 (1H, ddd,  $J = 1.5, 1.5, 8.7$  Hz), 4.63 (1H, d,  $J = 12.0$  Hz), 6.22 (1H, dd,  $J = 1.5, 9.9$  Hz), 7.08 (1H, d,  $J = 9.9$  Hz);  $^{13}\text{C}$  NMR (75 MHz,  $\text{CDCl}_3$ )  $\delta$  15.2 ( $\text{CH}_3$ ), 20.6 ( $\text{CH}_3$ ), 33.1 ( $\text{CH}_2$ ), 64.9 ( $\text{CH}_2$ ), 66.6 ( $\text{CH}_2$ ), 80.7 (CH), 81.1 (C), 82.0 (CH), 128.1 (CH), 150.5 (CH), 170.6 (C), 196.1 (C); HRMS (ESI) Exact mass calcd for  $\text{C}_{12}\text{H}_{16}\text{NaO}_5$   $[\text{M}+\text{Na}]^+$  263.0890, found 263.0900.

***endo*-5-Acetoxymethyl-6-(cyclohexyloxy)-8-oxabicyclo[3.2.1]oct-3-en-2-one (*endo*-6c).** Isolated as

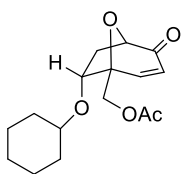

yellow oil (56.2 mg, 76%) after silica gel column chromatography (15 g, eluent: Hexane/EtOAc (80 : 20, v/v)) following the general procedure (40 h) using cyclohexyl vinyl ether (**5c**) (177  $\mu\text{L}$ , 1.25 mmol, 5.0 equiv) and *N,N*-diisopropylethylamine (8.71  $\mu\text{L}$ , 0.050 mmol, 0.2 equiv). A solution of 6-acetoxy-6-acetoxymethyl-2*H*-pyran-3(6*H*)-

one (**1**) (57.1 mg, 0.25 mmol) in  $\text{CH}_2\text{Cl}_2$  (0.5 mL) was added to the mixture by cannula transfer, and

then a vessel was washed with CH<sub>2</sub>Cl<sub>2</sub> (0.5 mL x 3). R<sub>f</sub> = 0.39 (Hexane/EtOAc, 67 : 33, v/v); IR (neat) 2933, 2857, 1746, 1704, 1450, 1365, 1229, 1081, 1048, 956, 861, 756 cm<sup>-1</sup>; <sup>1</sup>H NMR (300 MHz, CDCl<sub>3</sub>) δ 1.19-1.28 (5H, m), 1.50 (1H, m), 1.65 (1H, ddd, *J* = 1.8, 4.2, 13.5 Hz), 1.65-1.86 (4H, m), 2.13 (3H, s), 2.73 (1H, ddd, *J* = 8.7, 8.7, 13.5 Hz), 3.26 (1H, m), 4.17 (1H, dd, *J* = 4.2, 8.7 Hz), 4.24 (1H, d, *J* = 12.0 Hz), 4.47 (1H, ddd, *J* = 1.2, 1.8, 8.7 Hz), 4.57 (1H, d, *J* = 12.0 Hz), 6.20 (1H, dd, *J* = 1.2, 9.9 Hz), 7.07 (1H, d, *J* = 9.9 Hz); <sup>13</sup>C NMR (75 MHz, CDCl<sub>3</sub>) δ 20.6 (CH<sub>3</sub>), 23.7 (CH<sub>2</sub>), 23.8 (CH<sub>2</sub>), 25.4 (CH<sub>2</sub>), 31.9 (CH<sub>2</sub>), 32.8 (CH<sub>2</sub>), 34.0 (CH<sub>2</sub>), 64.9 (CH<sub>2</sub>), 78.3 (CH), 79.7 (CH), 80.8 (CH), 81.1 (C), 127.9 (CH), 150.9 (CH), 170.6 (C), 196.2 (C); HRMS (ESI) Exact mass calcd for C<sub>16</sub>H<sub>22</sub>NaO<sub>5</sub> [M+Na]<sup>+</sup> 317.1359, found 317.1353.

**endo-5-Acetoxymethyl-6-*t*-butoxy-8-oxabicyclo[3.2.1]oct-3-en-2-one (endo-6d).** Isolated as yellow

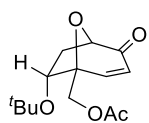

oil (40.5 mg, 60%) after silica gel column chromatography (12 g, eluent: Hexane/EtOAc (85 : 15, v/v)) following the general procedure (40 h) using *t*-butyl vinyl ether (**5d**) (164 μL, 1.25 mmol, 5.0 equiv) and *N,N*-diisopropylethylamine (8.71 μL, 0.050 mmol, 0.2 equiv).

A solution of 6-acetoxy-6-acetoxymethyl-2*H*-pyran-3(6*H*)-one (**1**) (57.1 mg, 0.25 mmol) in CH<sub>2</sub>Cl<sub>2</sub> (0.5 mL) was added to the mixture by cannula transfer, and then a vessel was washed with CH<sub>2</sub>Cl<sub>2</sub> (0.5 mL x 3). R<sub>f</sub> = 0.37 (Hexane/EtOAc, 67 : 33, v/v); IR (KBr) 1743, 1704, 1369, 1239, 1080, 1026, 936, 688, 444 cm<sup>-1</sup>; <sup>1</sup>H NMR (300 MHz, CDCl<sub>3</sub>) δ 1.15 (9H, s), 1.61 (1H, ddd, *J* = 1.8, 4.2, 13.5 Hz), 2.13 (3H, s), 2.71 (1H, ddd, *J* = 8.7, 8.7, 13.5 Hz), 4.22 (1H, d, *J* = 12.0 Hz), 4.23 (1H, dd, *J* = 4.2, 8.7 Hz), 4.46 (1H, ddd, *J* = 1.2, 1.8, 8.7 Hz), 4.54 (1H, d, *J* = 12.0 Hz), 6.19 (1H, dd, *J* = 1.2, 9.9 Hz), 7.02 (1H, d, *J* = 9.9 Hz); <sup>13</sup>C NMR (75 MHz, CDCl<sub>3</sub>) δ 20.7 (CH<sub>3</sub>), 28.1 (CH<sub>3</sub>), 35.8 (CH<sub>2</sub>), 64.4 (CH<sub>2</sub>), 74.4 (CH), 74.5 (C), 80.8 (CH), 81.0 (C), 127.8 (CH), 151.0 (CH), 170.6 (C), 196.4 (C); HRMS (ESI) Exact mass calcd for C<sub>14</sub>H<sub>20</sub>NaO<sub>5</sub> [M+Na]<sup>+</sup> 291.1203, found 291.1206.

**endo- and exo-5-Acetoxymethyl-6-(*t*-butoxycarbonyl)-8-oxabicyclo[3.2.1]oct-3-en-2-one (endo-8a and exo-8a).** Isolated as yellow oil (42.4 mg, 62% including 3% of regioisomer, *endo* : *exo* = 66 : 34) after silica gel column chromatography (15 g, eluent: Hexane/EtOAc (80 : 20, v/v) and then

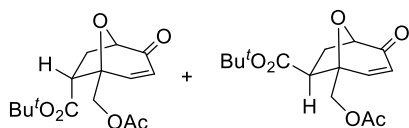

25 g, eluent: Toluene/EtOAc (90 : 10, v/v)) following the general procedure (24 h) using [Pd(η<sup>3</sup>-



$\text{C}_3\text{H}_5\text{Cl}]_2$  (4.6 mg, 0.0125 mmol, 5.0 mol%), *t*-butyl acrylate (**7a**) (181  $\mu\text{L}$ , 1.25 mmol, 5.0 equiv), *N,N*-diisopropylethylamine (8.7  $\mu\text{L}$ , 0.05 mmol, 0.2 equiv), and 6-acetoxymethyl-6-(*t*-butoxycarbonyloxy)-2*H*-pyran-3(6*H*)-one (71.6 mg, 0.25 mmol). A solution of 6-acetoxymethyl-6-(*t*-butoxycarbonyloxy)-2*H*-pyran-3(6*H*)-one in  $\text{CH}_2\text{Cl}_2$  (0.5 mL) was added to the mixture by cannula transfer, and then a vessel was washed with  $\text{CH}_2\text{Cl}_2$  (0.5 mL x 3).  $R_f = 0.26$  (Hexane/EtOAc, 67 : 33, v/v); IR (neat) 2979, 1734, 1229, 1151, 1032, 757  $\text{cm}^{-1}$ ;  $^1\text{H}$  NMR (300 MHz,  $\text{CDCl}_3$ )  $\delta$  1.45 (9H x 66/100, s), 1.49 (9H x 34/100, s), 1.99 (1H x 34/100, ddd,  $J = 1.5, 8.7, 13.5$  Hz), 2.12 (3H x 34/100, s), 2.14 (3H x 66/100, s), 2.19 (1H x 66/100, ddd,  $J = 1.5, 5.7, 13.5$  Hz), 2.66 (1H x 66/100, ddd,  $J = 8.7, 10.8, 13.5$  Hz), 2.83 (1H x 34/100, ddd,  $J = 3.6, 8.7, 13.5$  Hz), 3.00 (1H x 34/100, dd,  $J = 3.6, 8.7$  Hz), 3.20 (1H x 66/100, dd,  $J = 5.7, 10.8$  Hz), 4.17 (1H x 34/100, d,  $J = 12.0$  Hz), 4.35 (1H x 66/100, d,  $J = 12.0$  Hz), 4.58 (1H x 66/100, ddd,  $J = 1.2, 1.5, 8.7$  Hz), 4.67 (1H x 34/100, d,  $J = 12.0$  Hz), 4.73 (1H x 34/100, ddd,  $J = 1.2, 1.5, 8.7$  Hz), 4.84 (1H x 66/100, d,  $J = 12.0$  Hz), 6.07 (1H x 34/100, dd,  $J = 1.2, 9.9$  Hz), 6.14 (1H x 66/100, dd,  $J = 1.2, 9.9$  Hz), 7.07 (1H x 66/100, d,  $J = 9.9$  Hz), 7.21 (1H x 34/100, d,  $J = 9.9$  Hz);  $^{13}\text{C}$  NMR (125 MHz,  $\text{CDCl}_3$ )  $\delta$  20.65 ( $\text{CH}_3$ , *exo*), 20.70 ( $\text{CH}_3$ , *endo*), 27.88 ( $\text{CH}_3$ , *endo*), 27.92 ( $\text{CH}_3$ , *exo*), 29.2 ( $\text{CH}_2$ , *endo*), 30.2 ( $\text{CH}_2$ , *exo*), 49.1 ( $\text{CH}$ , *exo*), 49.9 ( $\text{CH}$ , *endo*), 64.6 ( $\text{CH}_2$ , *exo*), 65.2 ( $\text{CH}_2$ , *endo*), 81.0 ( $\text{CH}$ , *endo*), 81.6 ( $\text{CH}$ , *exo*), 81.8 ( $\text{C}$ , *endo*), 82.4 ( $\text{C}$ , *endo*), 82.5 ( $\text{C}$ , *exo*), 83.0 ( $\text{C}$ , *exo*), 126.8 ( $\text{CH}$ , *exo*), 128.4 ( $\text{CH}$ , *endo*), 149.3 ( $\text{CH}$ , *endo*), 151.7 ( $\text{CH}$ , *exo*), 168.7 ( $\text{C}$ , *endo*), 169.8 ( $\text{C}$ , *exo*), 170.4 ( $\text{C}$ , *exo*), 170.5 ( $\text{C}$ , *endo*), 195.55 ( $\text{C}$ , *endo*), 195.63 ( $\text{C}$ , *exo*); HRMS (ESI) Exact mass calcd for  $\text{C}_{15}\text{H}_{20}\text{NaO}_6$  [ $\text{M}+\text{Na}$ ] $^+$  319.1152, found 319.1152.

The stereochemistry of cycloadducts **8a** was determined by comparison with  $^1\text{H}$  NMR data of the cycloadducts of ethyl acrylate for the synthesis of englerin A in the literature.<sup>15</sup>

**endo- and exo-5-Acetoxymethyl-6-[(1-benzyl-5,5-dimethyl-3-pyrazolidinonyl)carbonyl]-8-oxabicyclo[3.2.1]oct-3-en-2-one (endo-8b and exo-8b).** The  $^1\text{H}$

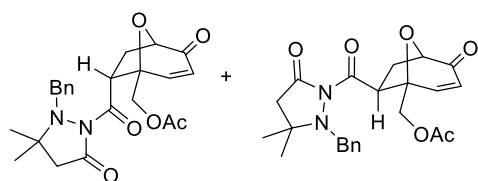

NMR yield (62%, *endo* : *exo* = 63 : 37) of **8b** was determined using  $\text{Cl}_2\text{CHCHCl}_2$  as an internal standard. The reaction was carried out following the general procedure (20 h) using 2-

acryloyl-1-benzyl-5,5-dimethyl-3-pyrazolidinone (**7b**) (216 mg, 1.25 mmol, 5.0 equiv). A solution of 6-

acetoxy-6-acetoxymethyl-2*H*-pyran-3(6*H*)-one (**1**) (57.1 mg, 0.25 mmol) in CH<sub>2</sub>Cl<sub>2</sub> (0.5 mL) was added to the mixture by cannula transfer, and then a vessel was washed with CH<sub>2</sub>Cl<sub>2</sub> (0.5 mL x 3). The sample (41.3 mg, *endo* : *exo* = 71 : 29) for <sup>1</sup>H and <sup>13</sup>C NMR spectra were obtained by purification with silica gel column chromatography (CH<sub>2</sub>Cl<sub>2</sub>/EtOAc (90 : 10, v/v)) followed by GPC (CHCl<sub>3</sub>). *R<sub>f</sub>* = 0.30 (CH<sub>2</sub>Cl<sub>2</sub>/EtOAc, 90 : 10, v/v); <sup>1</sup>H NMR (300 MHz, C<sub>6</sub>D<sub>6</sub>) δ 0.68 (3H x 71/100, s), 0.73 (3H x 29/100, s), 0.82 (3H x 71/100, s), 0.83 (3H x 29/100, s), 1.55-1.62 (1H x 71/100 + 1H x 29/100, m), 1.63 (3H x 29/100, s), 1.68 (3H x 71/100, s), 2.00 (1H x 71/100, d, *J* = 17.1 Hz), 2.07 (1H x 71/100, d, *J* = 17.1 Hz), 2.02 (1H x 29/100, d, *J* = 17.1 Hz), 2.08 (1H x 29/100, d, *J* = 17.1 Hz), 2.74 (1H x 29/100, ddd, *J* = 4.2, 8.7, 12.9 Hz), 2.82 (1H x 71/100, ddd, *J* = 8.4, 10.5, 12.9 Hz), 3.48 (1H x 71/100, d, *J* = 13.8 Hz), 3.61 (1H x 29/100, d, *J* = 14.1 Hz), 3.69 (1H x 71/100, d, *J* = 13.8 Hz), 3.79 (1H x 29/100, d, *J* = 14.1 Hz), 4.21 (1H x 29/100, d, *J* = 11.4 Hz), 4.21 (1H x 29/100, dd, *J* = 4.2, 8.4 Hz), 4.27 (1H x 71/100, d, *J* = 12.0 Hz), 4.28 (1H x 71/100, dd, *J* = 7.2, 10.5 Hz), 4.38 (1H x 71/100, d, *J* = 12.0 Hz), 4.47 (1H x 71/100, ddd, *J* = 1.5, 1.8, 8.4 Hz), 4.68 (1H x 29/100, ddd, *J* = 1.2, 1.2, 8.7 Hz), 4.79 (1H x 29/100, d, *J* = 11.4 Hz), 5.84 (1H x 29/100, dd, *J* = 1.2, 9.9 Hz), 5.89 (1H x 71/100, dd, *J* = 1.5, 9.9 Hz), 6.95 (1H x 29/100, d, *J* = 9.9 Hz), 6.97 (1H x 71/100, d, *J* = 9.9 Hz), 7.05-7.20 (3H x 71/100 + 3H x 29/100, m), 7.41-7.44 (2H x 71/100, m), 7.49-7.54 (2H x 29/100, m); <sup>13</sup>C NMR (75 MHz, C<sub>6</sub>D<sub>6</sub>) δ 20.2 (CH<sub>3</sub>, *exo*), 20.3 (CH<sub>3</sub>, *endo*), 25.4 (CH<sub>3</sub>, *endo*), 25.7 (CH<sub>3</sub>, *exo*), 26.0 (CH<sub>3</sub>, *endo*), 26.2 (CH<sub>3</sub>, *exo*), 30.9 (CH<sub>2</sub>, *exo*), 31.5 (CH<sub>2</sub>, *endo*), 43.0 (CH<sub>2</sub>, *endo*), 43.4 (CH<sub>2</sub>, *exo*), 48.9 (CH, *exo*), 51.6 (CH, *endo*), 56.7 (CH<sub>2</sub>, *exo*), 57.1 (CH<sub>2</sub>, *endo*), 60.2 (C, *exo*), 60.5 (C, *endo*), 64.3 (CH<sub>2</sub>, *endo*), 65.7 (CH<sub>2</sub>, *exo*), 80.7 (CH, *endo*), 82.2 (CH, *exo*), 82.3 (C, *endo*), 84.2 (C, *exo*), 125.5 (CH, *endo*), 126.9 (CH, *exo*), 127.6 (CH, *exo*), 127.8 (CH, *endo*), 128.4 (CH, *exo*), 128.5 (CH, *endo*), 129.0 (CH, *exo*), 129.3 (CH, *endo*), 138.3 (C, *endo*), 138.9 (C, *exo*), 151.1 (CH, *endo*), 152.1 (CH, *exo*), 167.1 (C, *exo*), 167.3 (C, *endo*), 169.9 (C, *exo*), 170.4 (C, *endo*), 174.1 (C, *endo*), 174.9 (C, *exo*), 195.1 (C, *exo*), 195.9 (C, *endo*).

***endo*-5-Acetoxymethyl-6-[(1-benzyl-5,5-dimethyl-3-pyrazolidinonyl)carbonyl]-8-oxabicyclo-**

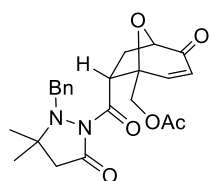

**[3.2.1]oct-3-en-2-one (*endo*-8b).** Isolated as colorless prisms (23.9 mg, *endo* only) after silica gel column chromatography (12 g, eluent: Hexane/EtOAc (60 : 40, v/v), 15 g, eluent: Toluene/EtOAc (80 : 20, v/v), and then 12 g, eluent: CH<sub>2</sub>Cl<sub>2</sub>/EtOAc (90 : 10,

v/v)) followed by washing with Et<sub>2</sub>O (1 mL). *R<sub>f</sub>* = 0.29 (CH<sub>2</sub>Cl<sub>2</sub>/EtOAc, 90 : 10, v/v); mp 156 – 159 °C; IR (KBr) 2993, 1747, 1693, 1362, 1237, 1035, 864, 824, 771, 720, 695, 645, 630, 451 cm<sup>-1</sup>; <sup>1</sup>H NMR (300 MHz, C<sub>6</sub>D<sub>6</sub>) δ 0.67 (3H, s), 0.82 (3H, s), 1.58 (1H, ddd, *J* = 1.8, 7.5, 12.9 Hz), 1.68 (3H, s), 2.00 (1H, d, *J* = 17.2 Hz), 2.05 (1H, d, *J* = 17.2 Hz), 2.82 (1H, ddd, *J* = 8.4, 10.5, 12.9 Hz), 3.46 (1H, d, *J* = 13.8 Hz), 3.68 (1H, d, *J* = 13.8 Hz), 4.26 (1H, d, *J* = 12.0 Hz), 4.28 (1H, dd, *J* = 7.5, 10.5 Hz), 4.38 (1H, d, *J* = 12.0 Hz), 4.47 (1H, ddd, *J* = 1.5, 1.8, 8.4 Hz), 5.88 (1H, dd, *J* = 1.5, 9.9 Hz), 6.96 (1H, d, *J* = 9.9 Hz), 7.05-7.19 (3H, m), 7.41-7.44 (2H, m); <sup>13</sup>C NMR (75 MHz, C<sub>6</sub>D<sub>6</sub>) δ 20.3 (CH<sub>3</sub>), 25.4 (CH<sub>3</sub>), 26.0 (CH<sub>3</sub>), 31.5 (CH<sub>2</sub>), 43.0 (CH<sub>2</sub>), 51.6 (CH), 57.1 (CH<sub>2</sub>), 60.5 (C), 64.3 (CH<sub>2</sub>), 80.7 (CH), 82.3 (C), 125.5 (CH), 127.8 (CH), 128.5 (CH), 129.3 (CH), 138.3 (C), 151.0 (CH), 167.3 (C), 170.4 (C), 174.1 (C), 195.9 (C); HRMS (ESI) Exact mass calcd for C<sub>23</sub>H<sub>26</sub>N<sub>2</sub>NaO<sub>6</sub> [M+Na]<sup>+</sup> 449.1683, found 449.1676.

The stereochemistry of cycloadducts **8b** was determined by comparison with <sup>1</sup>H NMR data of the cycloadducts of ethyl acrylate for the synthesis of englerin A in the literature.<sup>15</sup>

***exo*- and *endo*-8-(Acetoxy)methyl-3a,4,8,8a-tetrahydro-2-phenyl-4,8-epoxycyclohepta[*c*]pyrrole-**

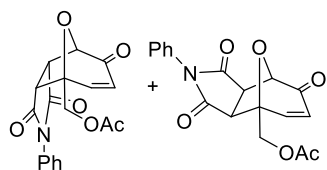

**1,3,5(2*H*)-trione (*endo*-8c and *exo*-8c).** Isolated as colorless prisms (55.4

mg, 65%, *exo* : *endo* = 57 : 43) after silica gel column chromatography (20 g,

eluent: CH<sub>2</sub>Cl<sub>2</sub>/EtOAc (90 : 10, v/v)) following the general procedure (64 h)

using *N*-phenylmaleimide (**7c**) (216 mg, 1.25 mmol, 5.0 equiv). A solution of 6-acetoxy-6-acetoxymethyl-2*H*-pyran-3(6*H*)-one (**1**) (57.1 mg, 0.25 mmol) in CH<sub>2</sub>Cl<sub>2</sub> (0.5 mL) was added to the mixture by cannula transfer, and then a vessel was washed with CH<sub>2</sub>Cl<sub>2</sub> (0.5 mL x 3). *R<sub>f</sub>* = 0.30 (CH<sub>2</sub>Cl<sub>2</sub>/EtOAc, 90 : 10, v/v); IR (KBr) 1716, 1496, 1387, 1224, 1197, 1037, 756, 692 cm<sup>-1</sup>; <sup>1</sup>H NMR (300 MHz, CDCl<sub>3</sub>) δ 2.06 (3H x 57/100, s), 2.16 (3H x 43/100, s), 3.47 (1H x 57/100, dd, *J* = 0.9, 7.5 Hz), 3.54 (1H x 57/100, d, *J* = 7.5 Hz), 3.86 (1H x 43/100, d, *J* = 9.3 Hz), 4.18 (1H x 43/100, dd, *J* = 9.0, 9.3 Hz), 4.34 (1H x 57/100, d, *J* = 12.6 Hz), 4.40 (1H x 43/100, d, *J* = 12.3 Hz), 4.77 (1H x 43/100, d, *J* = 12.3 Hz), 4.80 (1H x 57/100, d, *J* = 12.6 Hz), 5.00 (1H x 43/100, dd, *J* = 1.2, 9.0 Hz), 5.02 (1H x 57/100, dd, *J* = 0.9, 1.2 Hz), 6.16 (1H x 57/100, dd, *J* = 1.2, 9.9 Hz), 6.28 (1H x 43/100, dd, *J* = 1.2, 9.9 Hz), 7.05-7.09 (1H x 43/100 + 1H x 57/100, m), 7.21-7.32 (2H x 43/100 + 2H x 57/100, m), 7.38-7.51 (3H x 43/100 + 3H x 57/100, m); <sup>13</sup>C NMR (75 MHz, CDCl<sub>3</sub>) δ 20.5 (CH<sub>3</sub>, *exo*), 20.7 (CH<sub>3</sub>, *endo*), 47.6

(CH, *endo*), 47.9 (CH, *exo*), 51.1 (CH, *exo*), 51.7 (CH, *endo*), 63.6 (CH<sub>2</sub>, *exo*), 64.2 (CH<sub>2</sub>, *endo*), 82.2 (C, *endo*), 82.3 (CH, *endo*), 82.9 (C, *exo*), 84.0 (CH, *exo*), 126.1 (CH, *endo*), 126.2 (CH, *exo*), 127.2 (CH, *exo*), 129.1 (CH, *endo*), 129.19 (CH, *exo*), 129.22 (CH, *exo*), 129.4 (CH x 2, *endo*), 130.8 (C, *endo*), 131.2 (C, *exo*), 148.9 (CH, *endo*), 151.1 (CH, *exo*), 170.0 (C, *exo*), 170.3 (C, *endo*), 171.4 (C, *endo*), 171.7 (C, *exo*), 172.1 (C, *endo*), 173.6 (C, *exo*), 190.7 (C, *endo*), 191.8 (C, *exo*); HRMS (ESI) Exact mass calcd for C<sub>18</sub>H<sub>15</sub>NNaO<sub>6</sub> [M+Na]<sup>+</sup> 364.0792, found 364.0789.

The stereochemistry of cycloadducts **8c** was determined by coupling constants between H<sub>3a</sub> and H<sub>4</sub> of <sup>1</sup>H NMR.

**exo- and endo-5-[(Acetyloxy)methyl]-3',4'-dihydro-2'H-spiro[8-oxabicyclo[3.2.1]-oct-3-en-2-one-6,1'-naphthalene]** (**exo-10a** and **endo-10a**). Isolated as yellow viscous oil (68.3 mg, 88%, *exo* : *endo* = 76 : 24) after silica gel column chromatography (15 g, eluent: Toluene/EtOAc (93 : 7, v/v)) following the general procedure (12 h) using  $\alpha$ -methylenetetralin (**9a**) (180 mg, 1.25 mmol, 5.0 equiv). A solution of 6-acetoxy-6-acetoxymethyl-2H-pyran-3(6H)-one (**1**) (57.1 mg, 0.25 mmol) in CH<sub>2</sub>Cl<sub>2</sub> (0.5 mL) was added to the mixture by cannula transfer, and then a vessel was washed with CH<sub>2</sub>Cl<sub>2</sub> (0.5 mL x 3). R<sub>f</sub> = 0.28 (Toluene/EtOAc, 93 : 7, v/v); IR (neat) 3020, 2944, 1742, 1707, 1489, 1448, 1382, 1217, 1040, 754, 667 cm<sup>-1</sup>; <sup>1</sup>H NMR (300 MHz, CDCl<sub>3</sub>)  $\delta$  1.67-1.97 (4H x 76/100 + 4H x 24/100, m), 1.93 (3H x 24/100, s), 2.03 (1H x 76/100, dd, *J* = 1.8, 13.8 Hz), 2.03 (3H x 76/100, s), 2.33 (1H x 24/100, dd, *J* = 2.7, 13.8 Hz), 2.40 (1H x 24/100, m), 2.66 (1H x 24/100, dd, *J* = 9.0, 13.8 Hz), 2.81-2.85 (2H x 76/100 + 1H x 24/100, m), 2.90 (1H x 76/100, dd, *J* = 9.0, 13.8 Hz), 3.57 (1H x 76/100, d, *J* = 12.3 Hz), 4.34 (1H x 76/100, d, *J* = 12.3 Hz), 4.36 (1H x 24/100, d, *J* = 11.7 Hz), 4.42 (1H x 24/100, d, *J* = 11.7 Hz), 4.62 (1H x 24/100, ddd, *J* = 1.5, 2.7, 9.0 Hz), 4.73 (1H x 76/100, ddd, *J* = 1.2, 1.8, 9.0 Hz), 6.21 (1H x 76/100, dd, *J* = 1.2, 9.9 Hz), 6.30 (1H x 24/100, dd, *J* = 1.5, 9.9 Hz), 7.05 (1H x 24/100, d, *J* = 9.9 Hz), 7.06-7.21 (3H x 76/100 + 3H x 24/100, m), 7.22 (1H x 76/100, d, *J* = 9.9 Hz), 7.37 (1H x 24/100, m), 7.47 (1H x 76/100, m); <sup>13</sup>C NMR (75 MHz, CDCl<sub>3</sub>)  $\delta$  20.4 (CH<sub>3</sub>, *endo*), 20.6 (CH<sub>3</sub>, *exo*), 20.7 (CH<sub>2</sub>, *endo*), 20.8 (CH<sub>2</sub>, *exo*), 29.9 (CH<sub>2</sub>, *exo*), 30.5 (CH<sub>2</sub>, *endo*), 35.5 (CH<sub>2</sub>, *endo*), 35.6 (CH<sub>2</sub>, *exo*), 46.0 (CH<sub>2</sub>, *exo*), 46.6 (CH<sub>2</sub>, *endo*), 50.9 (C, *endo*), 51.7 (C, *exo*), 65.1 (CH<sub>2</sub>, *endo*), 66.1 (CH<sub>2</sub>, *exo*), 79.3 (CH,

*endo*), 80.3 (CH, *exo*), 86.4 (C, *endo*), 87.2 (C, *exo*), 125.6 (CH, *endo*), 126.3 (CH, *exo*), 126.7 (CH, *endo*), 126.79 (CH, *exo*), 126.83 (CH, *endo*), 127.5 (CH, *exo*), 128.6 (CH, *endo*), 128.8 (CH, *exo*), 129.3 (CH, *exo*), 129.8 (CH, *endo*), 135.0 (C, *endo*), 136.9 (C, *exo*), 138.6 (C, *exo*), 139.3 (C, *endo*), 152.9 (CH, *exo*), 154.1 (CH, *endo*), 170.4 (C, *endo*), 170.5 (C, *exo*), 196.0 (C, *endo*), 196.1 (C, *exo*); HRMS (ESI): Exact mass calcd for C<sub>19</sub>H<sub>20</sub>NaO<sub>4</sub> [M+Na]<sup>+</sup> 335.1254, found 335.1242.

The stereochemistry of *exo*-**10a** was determined by a 2D NOESY experiment, which showed NOEs between the methylene hydrogen of 1,2,3,4-tetrahydronaphthalene at  $\delta$  1.67-1.97 and H<sub>4</sub> at  $\delta$  7.22.

***exo*- and *endo*-5-[(Acetyloxy)methyl]-2',3'-dihydro-spiro[8-oxabicyclo[3.2.1]-oct-3-en-2-one-6,1'-**

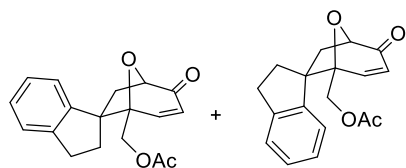

**[1H]-indene] (*exo*-**10b** and *endo*-**10b**).** Isolated as yellow viscous oil (63.0 mg, 84%, *exo* : *endo* = 72 : 28) after silica gel column chromatography (15 g, eluent: Toluene/EtOAc (93 : 7, v/v)) following

the general procedure (24 h) using 1-methyleneindan (**9b**) (163 mg, 1.25 mmol, 5.0 equiv). A solution of 6-acetoxy-6-acetoxymethyl-2*H*-pyran-3(6*H*)-one (**1**) (57.1 mg, 0.25 mmol) in CH<sub>2</sub>Cl<sub>2</sub> (0.5 mL) was added to the mixture by cannula transfer, and then a vessel was washed with CH<sub>2</sub>Cl<sub>2</sub> (0.5 mL x 3). R<sub>f</sub> = 0.28 (Toluene/EtOAc, 93 : 7, v/v); IR (KBr) 1731, 1694, 1268, 1247, 1027, 882, 765, 448 cm<sup>-1</sup>; <sup>1</sup>H NMR (300 MHz, CDCl<sub>3</sub>)  $\delta$  1.98 (3H x 28/100, s), 2.04 (3H x 72/100, s), 2.09-2.29 (3H x 72/100 + 1H x 28/100, m), 2.48 (1H x 28/100, dd, *J* = 2.4, 13.8 Hz), 2.63 (1H x 28/100, dd, *J* = 8.7, 13.8 Hz), 2.71 (1H x 28/100, m), 2.81 (1H x 72/100, dd, *J* = 9.0, 13.8 Hz), 2.87-3.06 (2H x 28/100 + 2H x 72/100, m), 3.75 (1H x 72/100, d, *J* = 12.3 Hz), 4.13 (1H x 72/100, d, *J* = 12.3 Hz), 4.22 (1H x 28/100, d, *J* = 11.7 Hz), 4.39 (1H x 28/100, d, *J* = 11.7 Hz), 4.67 (1H x 28/100, ddd, *J* = 1.5, 2.4, 8.7 Hz), 4.72 (1H x 72/100, ddd, *J* = 1.2, 1.8, 9.0 Hz), 6.19 (1H x 72/100, dd, *J* = 1.2, 9.9 Hz), 6.25 (1H x 28/100, dd, *J* = 1.5, 9.9 Hz), 6.78 (1H x 28/100, d, *J* = 9.9 Hz), 7.06 (1H x 28/100, m), 7.16 (1H x 28/100, m), 7.21-7.32 (2H x 28/100 + 4H x 72/100, m), 7.23 (1H x 72/100, d, *J* = 9.9 Hz); <sup>13</sup>C NMR (75 MHz, CDCl<sub>3</sub>)  $\delta$  20.5 (CH<sub>3</sub>, *endo*), 20.6 (CH<sub>3</sub>, *exo*), 30.8 (CH<sub>2</sub>, *exo*), 30.9 (CH<sub>2</sub>, *endo*), 34.9 (CH<sub>2</sub>, *exo*), 39.1 (CH<sub>2</sub>, *endo*), 44.28 (CH<sub>2</sub>, *exo*), 44.32 (CH<sub>2</sub>, *endo*), 59.3 (C, *endo*), 59.9 (C, *exo*), 64.0 (CH<sub>2</sub>, *endo*), 65.0 (CH<sub>2</sub>, *exo*), 80.0 (CH, *endo*), 80.2 (CH, *exo*), 85.3 (C, *exo*), 86.0 (C, *endo*) 124.4 (CH, *endo*, *exo*), 124.6 (CH, *exo*), 125.1 (CH, *endo*), 126.4 (CH, *endo*), 126.6 (CH, *endo*), 126.9 (CH, *exo*), 127.1 (CH, *exo*), 127.7 (CH, *exo*),

127.9 (CH, *endo*), 141.3 (C, *endo*), 142.8 (C, *exo*), 144.3 (C, *endo*), 145.3 (C, *exo*), 152.3 (CH, *exo*), 152.4 (CH, *endo*), 170.3 (C, *exo*), 170.5 (C, *endo*), 196.0 (C, *endo*), 196.3 (C, *exo*); HRMS (ESI): Exact mass calcd for C<sub>18</sub>H<sub>18</sub>NaO<sub>4</sub> [M+Na]<sup>+</sup> 321.1097, found 321.1088.

The stereochemistry of *exo*-**10b** was determined by a 2D NOESY experiment, which showed NOEs between the methylene hydrogen of indane at  $\delta$  2.09-2.29 and H<sub>4</sub> at  $\delta$  7.23.

***exo*-(2,2'-Dioxo-4',5'-dihydro-2'H-8-oxaspiro[bicyclo[3.2.1]oct[3]ene-6,3'-furan]-5-yl)methyl**

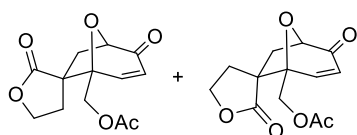

**acetate (*exo*-**10c**).**<sup>4</sup> Isolated as yellow plates (47.0 mg, 71%, *exo* : *endo* = 97 : 3) after silica gel column chromatography (7 g, eluent: Hexane/EtOAc (50 : 50, v/v)) following the general procedure (50 °C, 16

h) using [Pd( $\eta^3$ -C<sub>3</sub>H<sub>5</sub>)Cl]<sub>2</sub> (4.6 mg, 0.0125 mmol, 5.0 mol%),  $\alpha$ -methylene- $\gamma$ -butyrolactone (**9c**) (109  $\mu$ L, 1.25 mmol, 5.0 equiv), and *N,N*-diisopropylethylamine (8.7  $\mu$ L, 0.05 mmol, 0.2 equiv), and 6-acetoxymethyl-6-(*t*-butoxycarbonyloxy)-2*H*-pyran-3(6*H*)-one (71.6 mg, 0.25 mmol). A solution of 6-acetoxymethyl-6-(*t*-butoxycarbonyloxy)-2*H*-pyran-3(6*H*)-one in ClCH<sub>2</sub>CH<sub>2</sub>Cl (1.0 mL) was added to the mixture by cannula transfer, and then a vessel was washed with ClCH<sub>2</sub>CH<sub>2</sub>Cl (0.5 mL x 2). R<sub>f</sub> = 0.16 (Hexane/EtOAc, 67 : 33, v/v); IR (KBr) 3046, 1755, 1701, 1441, 1378, 1251, 1176, 1065, 874 cm<sup>-1</sup>; <sup>1</sup>H NMR (300 MHz, CDCl<sub>3</sub>)  $\delta$  1.96 (1H, dd, *J* = 1.5, 13.5 Hz), 2.13 (3H, s), 2.24 (1H, ddd, *J* = 4.7, 7.5, 13.2 Hz), 2.48 (1H, ddd, *J* = 7.9, 8.1, 13.2, Hz), 2.98 (1H, dd, *J* = 8.7, 13.5 Hz), 4.27 (1H, ddd, *J* = 7.5, 7.9, 9.3 Hz), 4.40 (1H, ddd, *J* = 4.7, 8.1, 9.3 Hz), 4.47 (1H, d, *J* = 11.7 Hz), 4.55 (1H, d, *J* = 11.7 Hz), 4.74 (1H, ddd, *J* = 1.3, 1.5, 8.7 Hz), 6.23 (1H, dd, *J* = 1.3, 10.0 Hz), 7.23 (1H, d, *J* = 10.0 Hz); The olefinic protons of *endo*-**10c** could be observed: 6.16 (1H, dd, *J* = 1.2, 9.9 Hz), 7.33 (1H, d, *J* = 9.9 Hz); <sup>13</sup>C NMR (75 MHz, CDCl<sub>3</sub>)  $\delta$  20.5 (CH<sub>3</sub>), 32.9 (CH<sub>2</sub>), 40.0 (CH<sub>2</sub>), 52.9 (C), 63.5 (CH<sub>2</sub>), 65.2 (CH<sub>2</sub>), 80.8 (CH), 82.7 (C), 128.2 (CH), 150.1 (CH), 169.9 (C), 176.7 (C), 194.9 (C); HRMS (ESI) Exact mass calcd for C<sub>13</sub>H<sub>14</sub>NaO<sub>6</sub> [M+Na]<sup>+</sup> 289.0683, found 289.0689.

The stereochemistry of *exo*-**10c** was determined by a 2D NOESY experiment, which showed NOEs between the methylene hydrogen of  $\gamma$ -butyrolactone at  $\delta$  2.48 and H<sub>4</sub> at  $\delta$  7.23, according to the literature.<sup>4</sup>

***exo*-(2,2'-Dioxo-2',4',5',6'-tetrahydro-8-oxaspiro[bicyclo[3.2.1]oct[3]ene-6,3'-pyran]-5-yl)methyl**

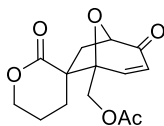

**acetate (*exo*-10d).** Isolated as colorless plates (42.6 mg, 61%, *exo* : *endo* = > 99 : 1) after silica gel column chromatography (10 g, eluent: Hexane/EtOAc (50 : 50, v/v)) following the general procedure (40 h) using  $\alpha$ -methylene- $\delta$ -valerolactone (**9d**) (135  $\mu$ L, 1.25

mmol, 5.0 equiv).  $R_f$  = 0.12 (Hexane/EtOAc, 67 : 33, v/v); IR (KBr) 2970, 1738, 1692, 1399, 1253, 1155, 1099, 1038, 1011, 886  $\text{cm}^{-1}$ ;  $^1\text{H}$  NMR (300 MHz,  $\text{CDCl}_3$ )  $\delta$  1.76 (1H, dd,  $J$  = 1.7, 13.4 Hz), 1.83-2.07 (4H, m), 2.14 (3H, s), 3.09 (1H, dd,  $J$  = 8.8, 13.4, Hz), 4.34-4.52 (2H, m), 4.41 (1H, d,  $J$  = 11.8 Hz), 4.46 (1H, d,  $J$  = 11.8 Hz), 4.72 (1H, ddd,  $J$  = 1.4, 1.7, 8.8 Hz), 6.24 (1H, dd,  $J$  = 1.4, 9.9 Hz), 7.16 (1H, d,  $J$  = 9.9 Hz);  $^{13}\text{C}$  NMR (75 MHz,  $\text{CDCl}_3$ )  $\delta$  20.5 ( $\text{CH}_3$ ), 21.7 ( $\text{CH}_2$ ), 32.0 ( $\text{CH}_2$ ), 42.2 ( $\text{CH}_2$ ), 54.5 (C), 64.5 ( $\text{CH}_2$ ), 70.5 ( $\text{CH}_2$ ), 80.6 (CH), 84.9 (C), 128.3 (CH), 150.4 (CH), 169.9 (C), 171.3 (C), 195.2 (C); HRMS (ESI) Exact mass calcd for  $\text{C}_{14}\text{H}_{16}\text{NaO}_6$  [ $\text{M}+\text{Na}$ ] $^+$  303.0839, found 303.0864.

The stereochemistry of *exo*-10d was determined by a 2D NOESY experiment, which showed NOEs between the methylene hydrogen of  $\delta$ -valerolactone at  $\delta$  1.83-2.07 and  $\text{H}_4$  at  $\delta$  7.16.

***exo*- and *endo*-(1',2-Dioxo-3',4'-dihydro-1'*H*-8-oxaspiro[bicyclo[3.2.1]oct[3]ene-6,2'-naphthalene]-5-yl)methyl acetate (*exo*-10e and *endo*-10e).** Isolated *exo*-10e as colorless plates (51.1 mg, 63%) and *endo*-10e as colorless plates (5.2 mg, 6%) after silica gel column chromatography (18 g, eluent: Toluene/EtOAc (91 : 9, v/v) and then 13 g, Hexane/EtOAc (67 : 33, v/v)) following the general procedure (20 h) using 3,4-dihydro-2-methylene-1(2*H*)-naphthalenone (**9e**) (198 mg, 1.25 mmol, 5.0 equiv).

***exo*-(1',2-Dioxo-3',4'-dihydro-1'*H*-8-oxaspiro[bicyclo[3.2.1]oct[3]ene-6,2'-naphthalene]-5-yl)-**

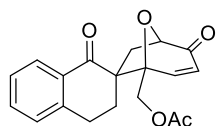

**methyl acetate (*exo*-10e).**  $R_f$  = 0.40 (Toluene/EtOAc, 83 : 17, v/v); IR (KBr) 2945, 1744, 1682, 1604, 1450, 1365, 1232, 1031, 910, 760  $\text{cm}^{-1}$ ;  $^1\text{H}$  NMR (300 MHz,  $\text{CDCl}_3$ )  $\delta$  1.57 (1H, dd,  $J$  = 1.7, 13.3 Hz), 1.93 (3H, s), 2.22 (1H, ddd,  $J$  = 4.8, 9.6,

14.3 Hz), 2.35 (1H, ddd,  $J$  = 4.9, 10.8, 14.3, Hz), 2.96 (1H, ddd,  $J$  = 4.9, 9.6, 17.5 Hz), 3.10 (1H, ddd,  $J$  = 4.8, 10.8, 17.5 Hz), 3.32 (1H, dd,  $J$  = 9.0, 13.3 Hz), 3.92 (1H, d,  $J$  = 12.1 Hz), 4.40 (1H, d,  $J$  = 12.1 Hz), 4.71 (1H, ddd,  $J$  = 1.2, 1.7, 9.0 Hz), 6.28 (1H, dd,  $J$  = 1.2, 10.0 Hz), 7.27 (1H, d,  $J$  = 10.0 Hz), 7.26-7.39 (2H, m), 7.53 (1H, dt,  $J$  = 1.4, 7.5 Hz), 8.09 (1H, dd,  $J$  = 1.2, 7.8 Hz);  $^{13}\text{C}$  NMR (75 MHz,

CDCl<sub>3</sub>)  $\delta$  20.3 (CH<sub>3</sub>), 26.5 (CH<sub>2</sub>), 32.7 (CH<sub>2</sub>), 38.0 (CH<sub>2</sub>), 58.3 (C), 64.5 (CH<sub>2</sub>), 80.4 (CH), 85.5 (C), 127.3 (CH), 128.0 (CH), 128.6 (CH), 128.7 (CH), 132.2 (C), 133.9 (CH), 142.3 (C), 150.3 (CH), 170.0 (C), 195.6 (C), 196.4 (C); HRMS (ESI): Exact mass calcd for C<sub>19</sub>H<sub>18</sub>NaO<sub>5</sub> [M+Na]<sup>+</sup> 349.1046, found 349.1053.

The stereochemistry of *exo*-**10e** was determined by a 2D NOESY experiment, which showed NOEs between the methylene hydrogen of cyclohexanone at  $\delta$  2.22, 2.35 and H<sub>4</sub> at  $\delta$  7.27.

***endo*-(1',2-Dioxo-3',4'-dihydro-1'H-8-oxaspiro[bicyclo[3.2.1]oct[3]ene-6,2'-naphthalene]-5-yl)-**

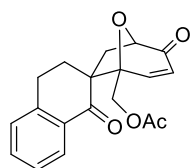

**methyl acetate (*endo*-**10e**).**  $R_f$  = 0.28 (Toluene/EtOAc, 83 : 17, v/v); IR (KBr) 2941,

1747, 1692, 1601, 1455, 1313, 1231, 1031, 848, 742 cm<sup>-1</sup>; <sup>1</sup>H NMR (300 MHz, CDCl<sub>3</sub>)

$\delta$  1.85 (1H, dd,  $J$  = 2.3, 13.4 Hz), 2.00 (3H, s), 2.25 (1H, ddd,  $J$  = 3.1, 5.2, 13.3 Hz),

2.36 (1H, ddd,  $J$  = 5.1, 11.4, 13.3 Hz), 2.78 (1H, dd,  $J$  = 8.6, 13.4 Hz), 3.07 (1H, ddd,  $J$  = 3.1, 5.1, 17.7

Hz), 3.22 (1H, ddd,  $J$  = 5.2, 11.4, 17.7 Hz), 4.35 (1H, d,  $J$  = 11.8 Hz), 4.39 (1H, d,  $J$  = 11.8 Hz), 4.60

(1H, ddd,  $J$  = 1.4, 2.3, 8.6 Hz), 6.04 (1H, dd,  $J$  = 1.4, 10.0 Hz), 7.26-7.35 (2H, m), 7.51 (1H, dt,  $J$  = 1.4,

7.5 Hz), 7.64 (1H, d,  $J$  = 10.0 Hz), 7.91 (1H, d,  $J$  = 1.1, 7.9 Hz); <sup>13</sup>C NMR (75 MHz, CDCl<sub>3</sub>)  $\delta$  20.5

(CH<sub>3</sub>), 25.9 (CH<sub>2</sub>), 29.8 (CH<sub>2</sub>), 34.6 (CH<sub>2</sub>), 60.4 (C), 63.7 (CH<sub>2</sub>), 80.0 (CH), 84.1 (C), 122.7 (CH),

127.0 (CH), 127.9 (CH), 128.7 (CH), 132.3 (C), 133.9 (CH), 142.6 (C), 154.0 (CH), 170.4 (C), 196.5

(C), 197.0 (C); HRMS (ESI): Exact mass calcd for C<sub>19</sub>H<sub>19</sub>O<sub>5</sub> [M+H]<sup>+</sup> 327.1227, found 327.1233.

**(1R\*,4S\*,8S\*,12R\*)-5,10,13-Trioxatetracyclo[6.5.1.0<sup>4,12</sup>.0<sup>8,12</sup>]tetradecane-2,9-dione (11).**<sup>4</sup> A

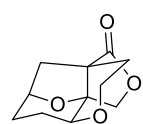

solution of **10c** (26.5 mg, 0.10 mmol) and Cs<sub>2</sub>CO<sub>3</sub> (163 mg, 0.50 mmol) in THF (0.5 mL)

and H<sub>2</sub>O (0.5 mL) was stirred at 35 °C for 14 h. The mixture was cooled to 25 °C and

acidified with 10% hydrochloric acid (0.4 mL) to pH 1. The resulting solution was stirred

at 25 °C for 3 h and THF was removed under reduced pressure. The residue was diluted with brine (3.75

mL) and extracted with EtOAc (7.5 mL x 3). The combined organic layers were dried over Na<sub>2</sub>SO<sub>4</sub> and

concentrated under reduced pressure. The residue was purified by silica gel column chromatography (7.0

g) with Hexane/EtOAc (50 : 50, v/v) to give 17.0 mg (76%) of **11** as colorless prisms.  $R_f$  = 0.34

(Hexane/EtOAc, 50 : 50, v/v); <sup>1</sup>H NMR (300 MHz, CDCl<sub>3</sub>)  $\delta$  1.85 (1H, ddd,  $J$  = 4.8, 12.6, 14.4 Hz),

1.93 (1H, dd,  $J$  = 1.5, 14.1 Hz), 2.06 (1H, ddd,  $J$  = 1.5, 2.1, 14.4 Hz), 2.52 (1H, d,  $J$  = 18.0 Hz), 2.92 (1H,



dd,  $J = 9.0, 14.1$  Hz), 3.11 (1H, dd,  $J = 10.2, 18.0$  Hz), 3.20 (1H, ddd,  $J = 2.1, 12.6, 12.9$  Hz), 3.70 (1H, ddd,  $J = 1.5, 4.8, 12.9$  Hz), 4.46 (1H, d,  $J = 10.8$  Hz), 4.49 (1H, d,  $J = 10.2$  Hz), 4.51 (1H, dd,  $J = 1.5, 9.0$  Hz), 4.54 (1H, dd,  $J = 10.8$  Hz);  $^{13}\text{C}$  NMR (75 MHz,  $\text{CDCl}_3$ )  $\delta$  28.4 ( $\text{CH}_2$ ), 38.0 ( $\text{CH}_2$ ), 42.1 ( $\text{CH}_2$ ), 48.8 (C), 55.2 ( $\text{CH}_2$ ), 67.4 (CH), 69.4 ( $\text{CH}_2$ ), 82.1 (C), 82.2 (CH), 178.9 (C), 210.2 (C).

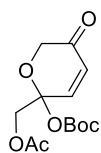

**6-[(*tert*-Butoxycarbonyl)oxy]-6-acetoxymethyl-2*H*-pyran-3(6*H*)-one.** To a cold (0 °C)

solution of 6-acetoxymethyl-6-hydroxy-2*H*-pyran-3(6*H*)-one<sup>3,4</sup> (1.53 g, 8.20 mmol) in  $\text{CH}_2\text{Cl}_2$  (16.4 mL) were added di-*tert*-butyl dicarbonate (2.68 g, 12.3 mmol) and *N,N*-dimethyl-4-aminopyridine (0.10 g, 0.82 mmol), successively. The mixture was stirred for 2 h at 0 °C. The resulting solution was directly purified by silica gel column chromatography (40 g) with  $\text{CH}_2\text{Cl}_2$  as eluent to give 1.24 g (53%) of the title compound as colorless needles.  $R_f = 0.60$  (Hexane/EtOAc, 50 : 50, v/v); IR (KBr) 2983, 2903, 1745, 1702, 1286, 1251, 971  $\text{cm}^{-1}$ ;  $^1\text{H}$  NMR (300 MHz,  $\text{CDCl}_3$ )  $\delta$  1.48 (9H, s), 2.11 (3H, s), 4.31 (1H, d,  $J = 17.3$  Hz), 4.44 (1H, d,  $J = 11.6$  Hz), 4.61 (1H, d,  $J = 11.6$  Hz), 4.66 (1H, d,  $J = 17.3$  Hz), 6.27 (1H, d,  $J = 10.5$  Hz), 7.16 (1H, d,  $J = 10.5$  Hz);  $^{13}\text{C}$  NMR (75 MHz,  $\text{CDCl}_3$ )  $\delta$  20.6 ( $\text{CH}_3$ ), 27.6 ( $\text{CH}_3$ ), 65.2 ( $\text{CH}_2$ ), 68.1 ( $\text{CH}_2$ ), 83.6 (C), 97.2 (C), 128.5 (CH), 142.9 (CH), 150.7 (C), 170.0 (C), 193.0 (C). The corresponding molecular ion peak was not observed by HRMS (ESI) probably due to instability.

## References

- 1) C. Hansch, A. Leo, and R. W. Taft, *Chem. Rev.*, 1991, **91**, 165–195.
- 2) H. van der Deen, A. van Oeveren, R. K. Kellogg, and B. L. Feringa, *Tetrahedron Lett.*, 1999, **40**, 1755–1758.
- 3) B. B. Snider and J. F. Grabowski, *Tetrahedron*, 2006, **62**, 5171–5177.
- 4) B. B. Snider, X. Wu, S. Nakamura, and S. Hashimoto, *Org. Lett.*, 2007, **9**, 873–874.
- 5) N. S. Y. Loy, S. Kim, and C.-M. Park, *Org. Lett.*, 2015, **17**, 395–397.
- 6) A. Falk, A.-L. Göderz, and H.-G. Schmalz, *Angew. Chem. Int. Ed.*, 2013, **52**, 1576–1580.
- 7) A. S. Jones, J. F. Paliga, M. D. Greenhalgh, J. M. Quibell, A. Steven, and S. P. Thomas, *Org. Lett.*, 2014, **16**, 5964–5967.

- 8) M. N. Azmi, M. F. M. Din, C. H. Kee, M. Suhaimi, A. K. Ping, K. Ahmad, M. A. Nafiah, N. F. Thomas, K. Mohamad, L. K. Hoong, and K. Awang, *Int. J. Mol. Sci.*, 2013, **14**, 23369–23389.
- 9) M. P. Sibi, L. M. Stanley, X. Nie, L. Venkatraman, M. Liu, and C. P. Jasperse, *J. Am. Chem. Soc.*, 2007, **129**, 395–405.
- 10) C. R. Larsen and D. B. Grotjahn, *J. Am. Chem. Soc.*, 2012, **134**, 10357–10360.
- 11) T. W. Liwosz and S. R. Chemler, *Chem. Eur. J.*, 2013, **19**, 12771–12777.
- 12) O. Stöhr and H. Ritter, *Macromol. Chem. Phys.*, 2014, **215**, 426–430.
- 13) J.-L. Gras, *Org. Syn.*, 1981, **60**, 88; *Org. Syn., Coll. Vol. 7*, 1990, 332.
- 14) M. R. Witten and E. N. Jacobsen, *Angew. Chem. Int. Ed.*, 2014, **53**, 5912–5916.
- 15) K. C. Nicolaou, Q. Kang, S. Y. Ng, and D. Y.-K. Chen, *J. Am. Chem. Soc.*, 2010, **132**, 8219–8222.

# <sup>1</sup>H NMR (300 MHz, CDCl<sub>3</sub>)

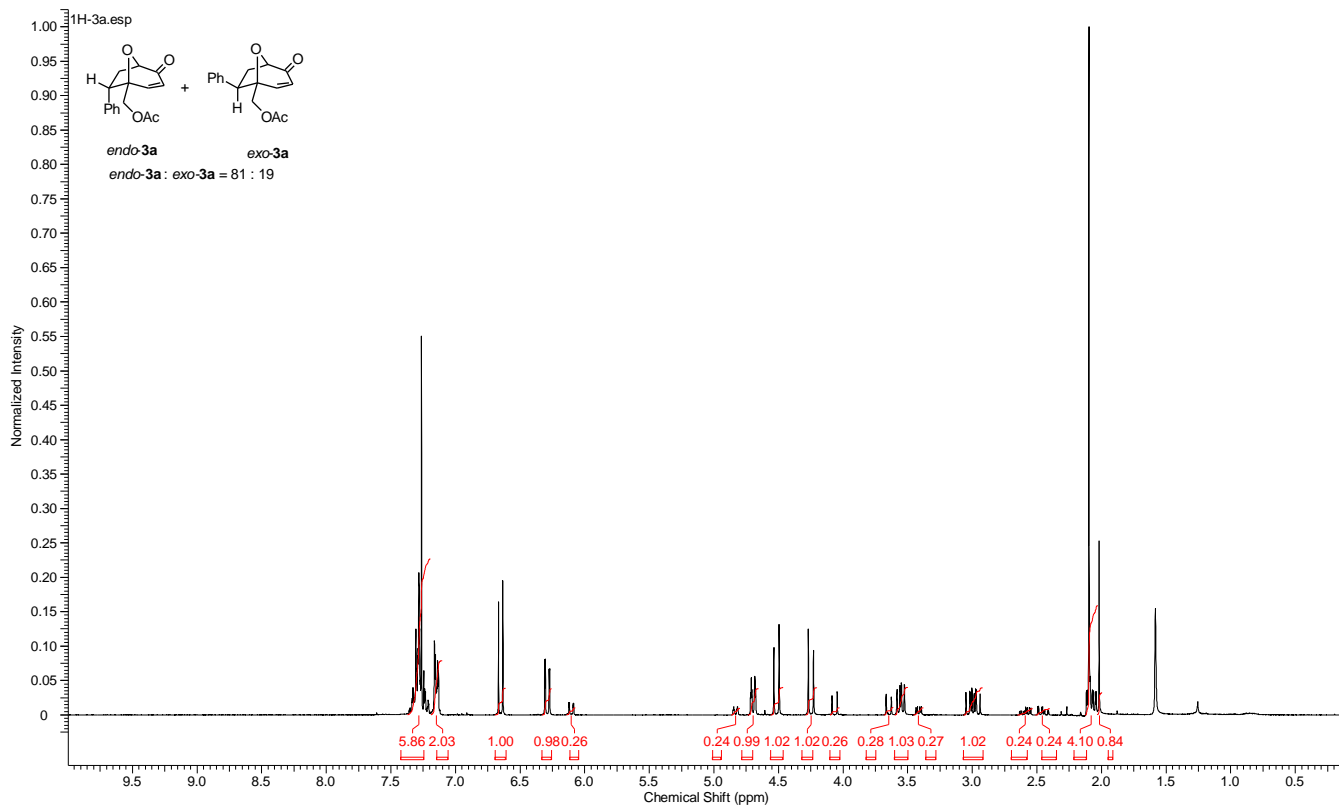

# <sup>13</sup>C NMR (125 MHz, CDCl<sub>3</sub>)

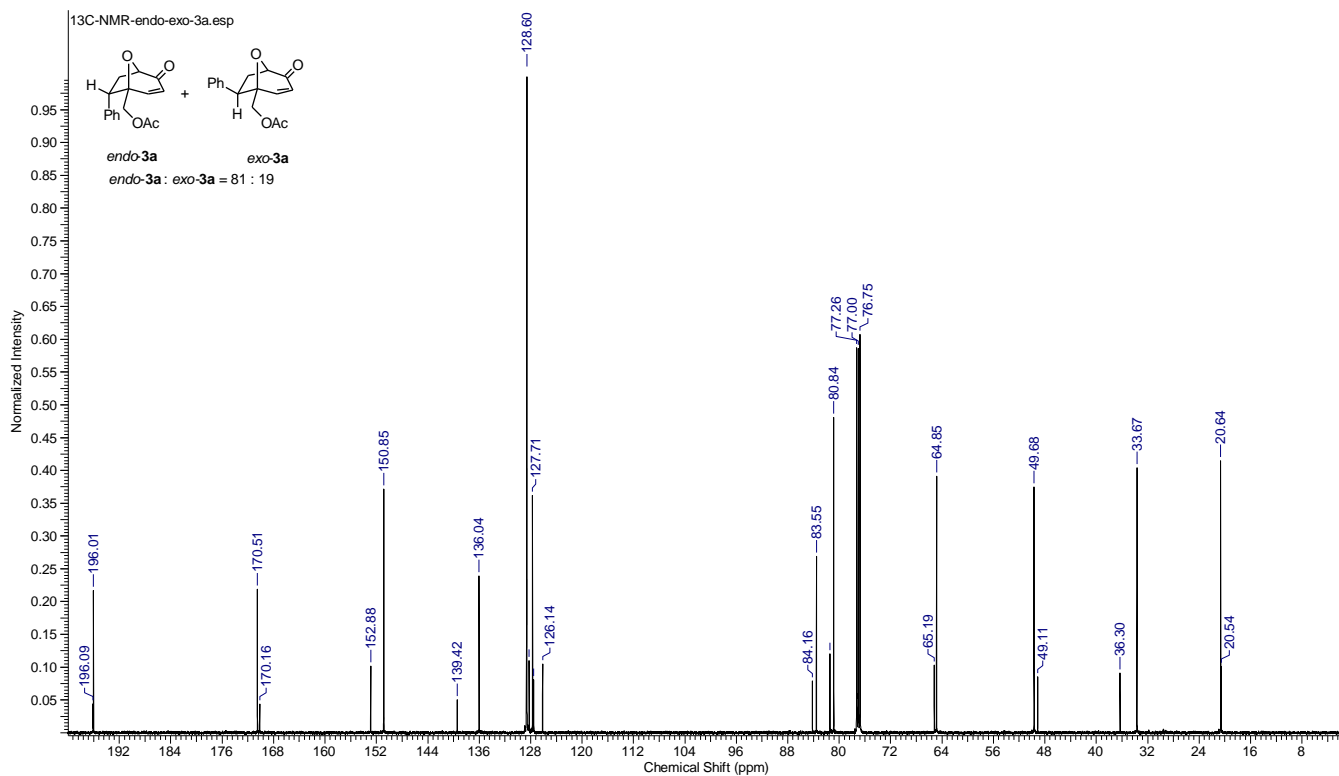

# <sup>1</sup>H NMR (500 MHz, CDCl<sub>3</sub>)

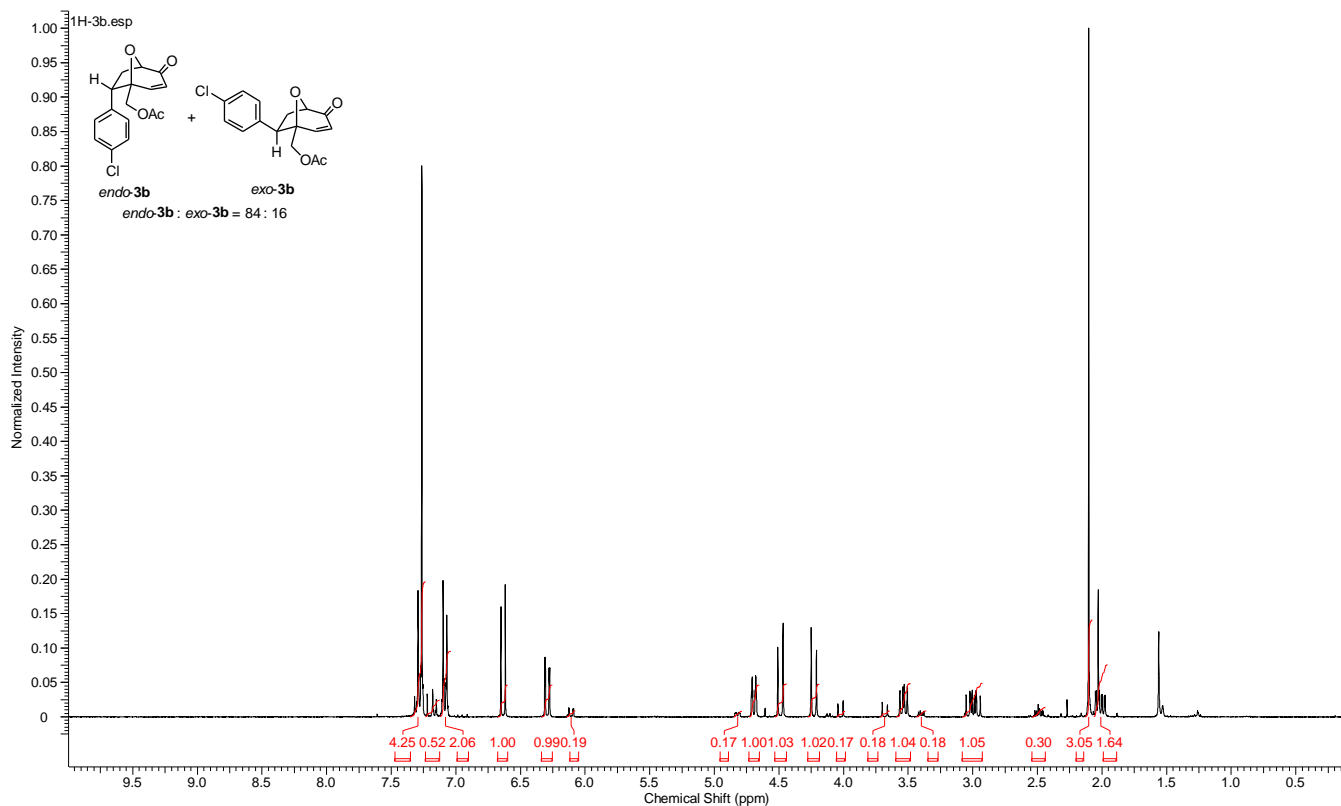

# <sup>13</sup>C NMR (125 MHz, CDCl<sub>3</sub>)

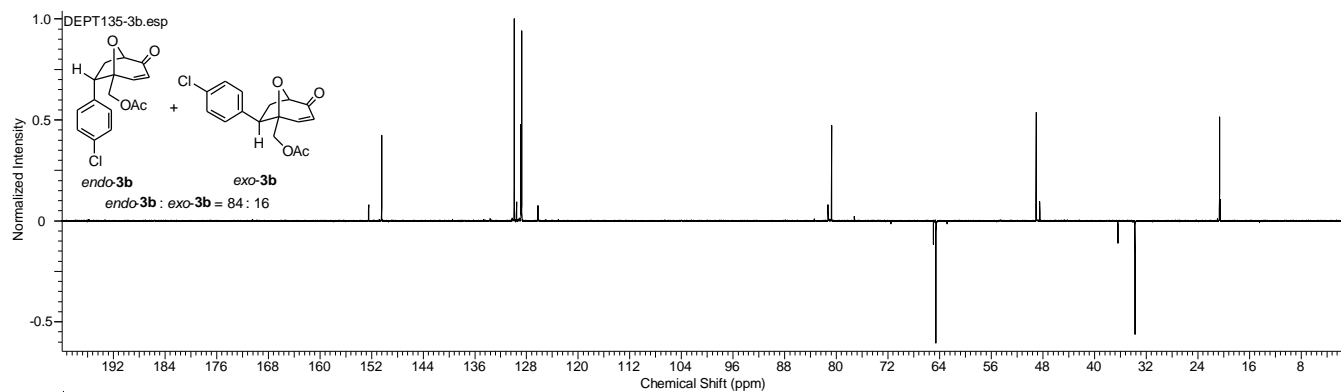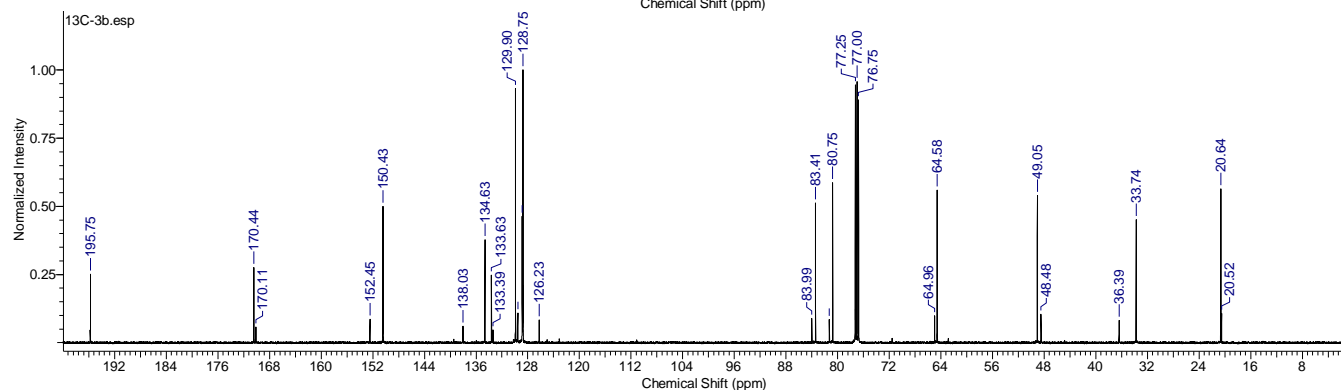

<sup>1</sup>H NMR (300 MHz, CDCl<sub>3</sub>)

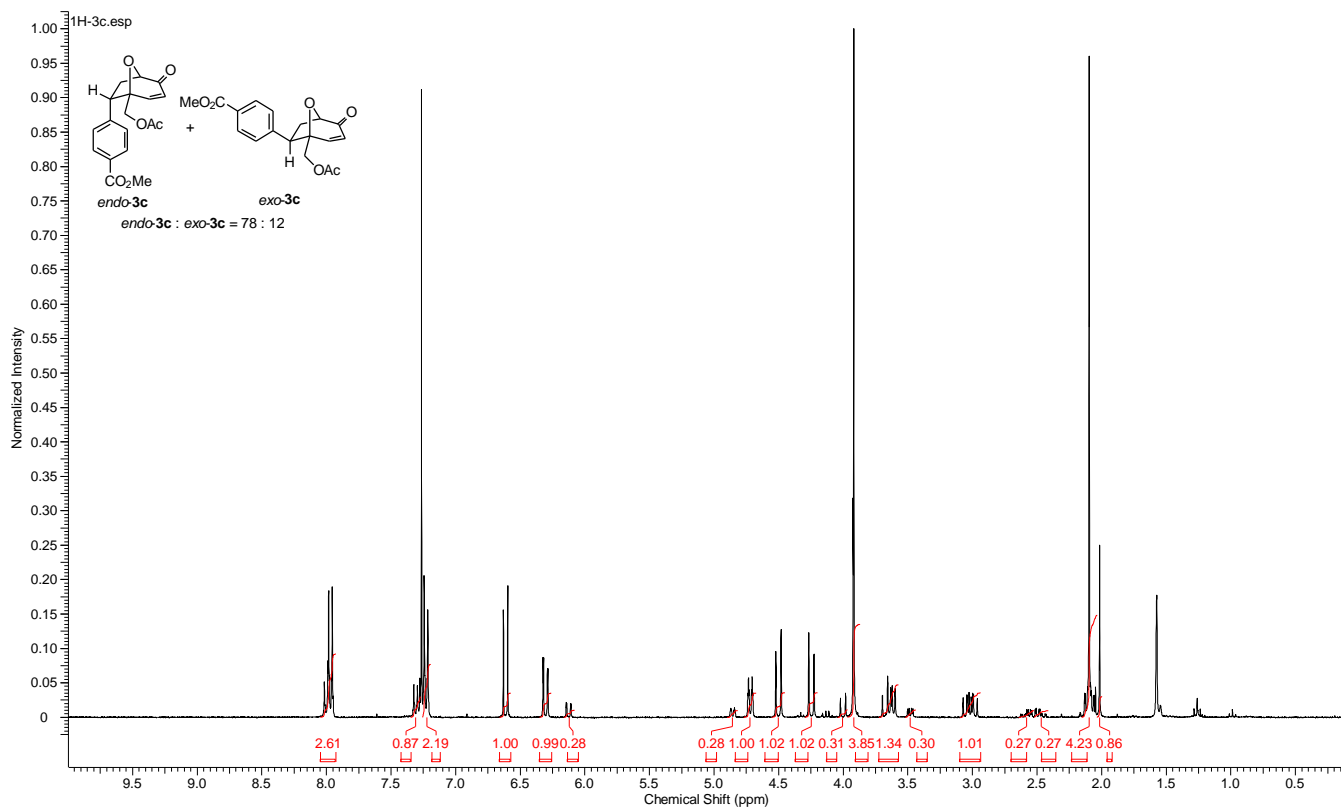

<sup>13</sup>C NMR (125 MHz, CDCl<sub>3</sub>)

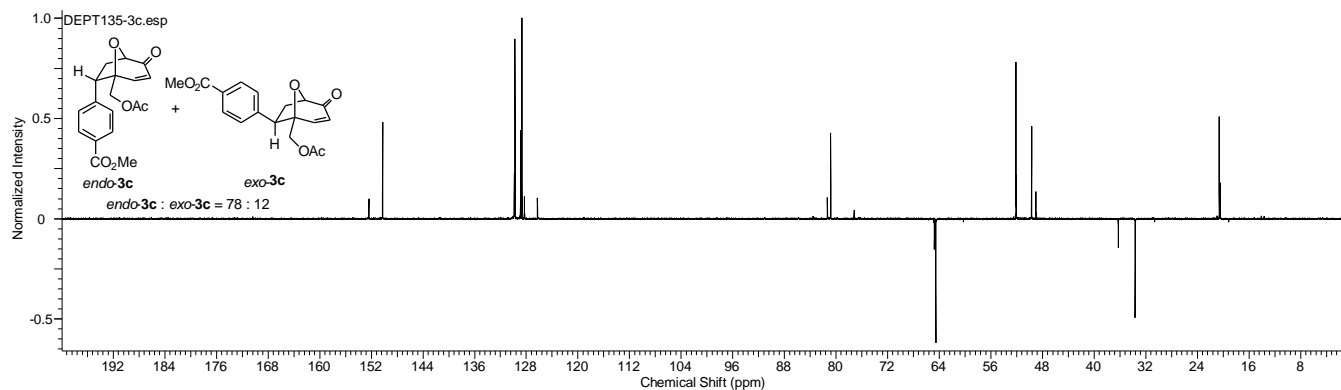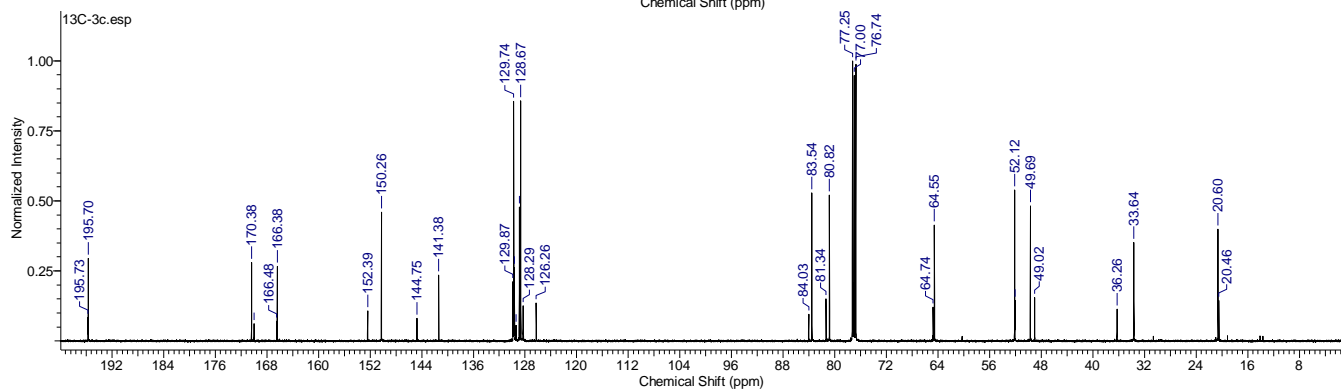

# <sup>1</sup>H NMR (300 MHz, CDCl<sub>3</sub>)

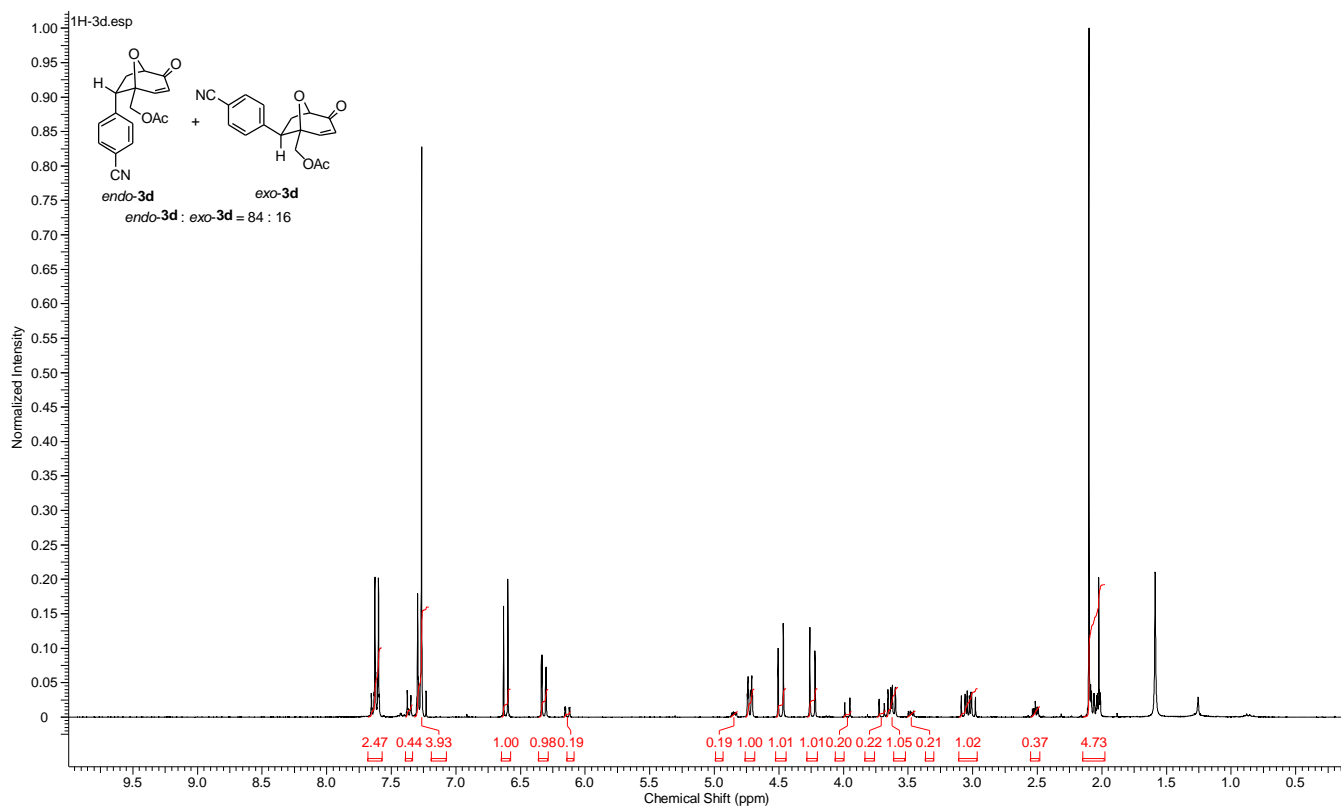

# <sup>13</sup>C NMR (125 MHz, CDCl<sub>3</sub>)

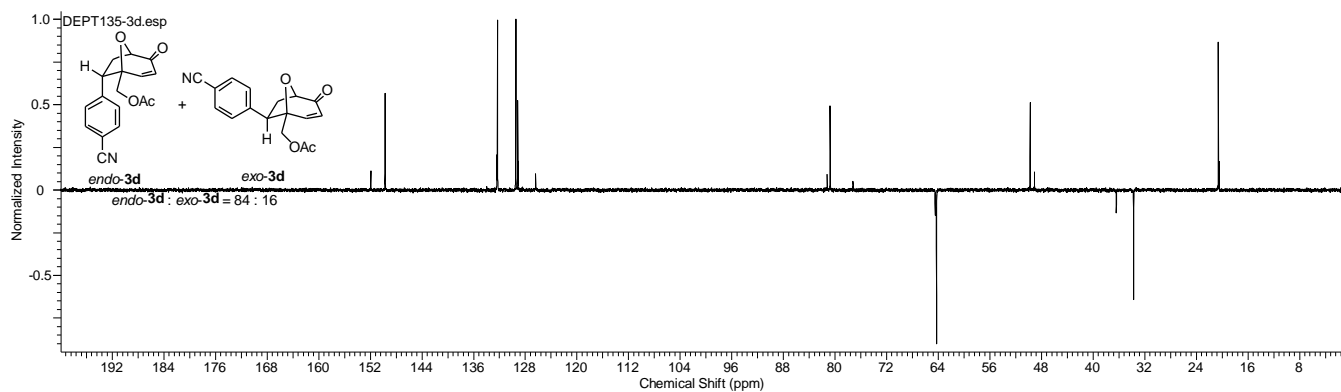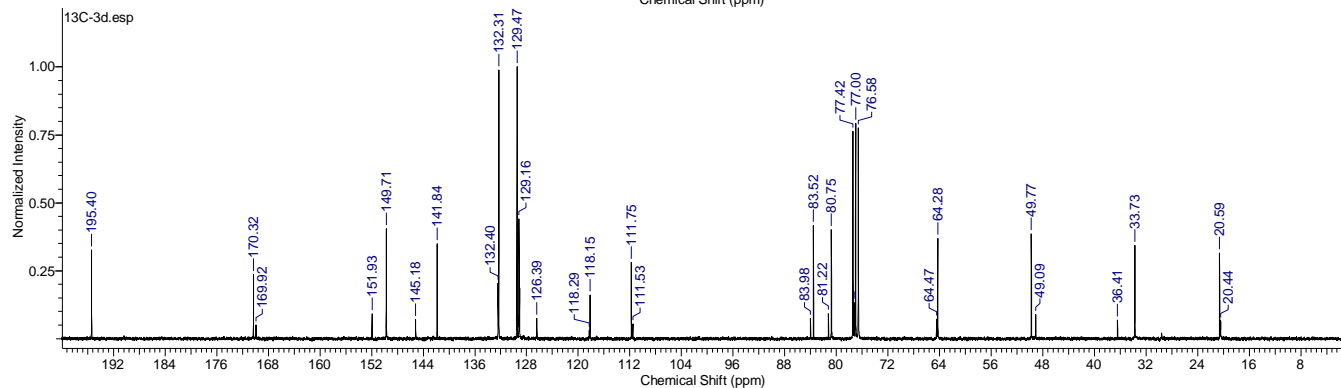

# <sup>1</sup>H NMR (300 MHz, CDCl<sub>3</sub>)

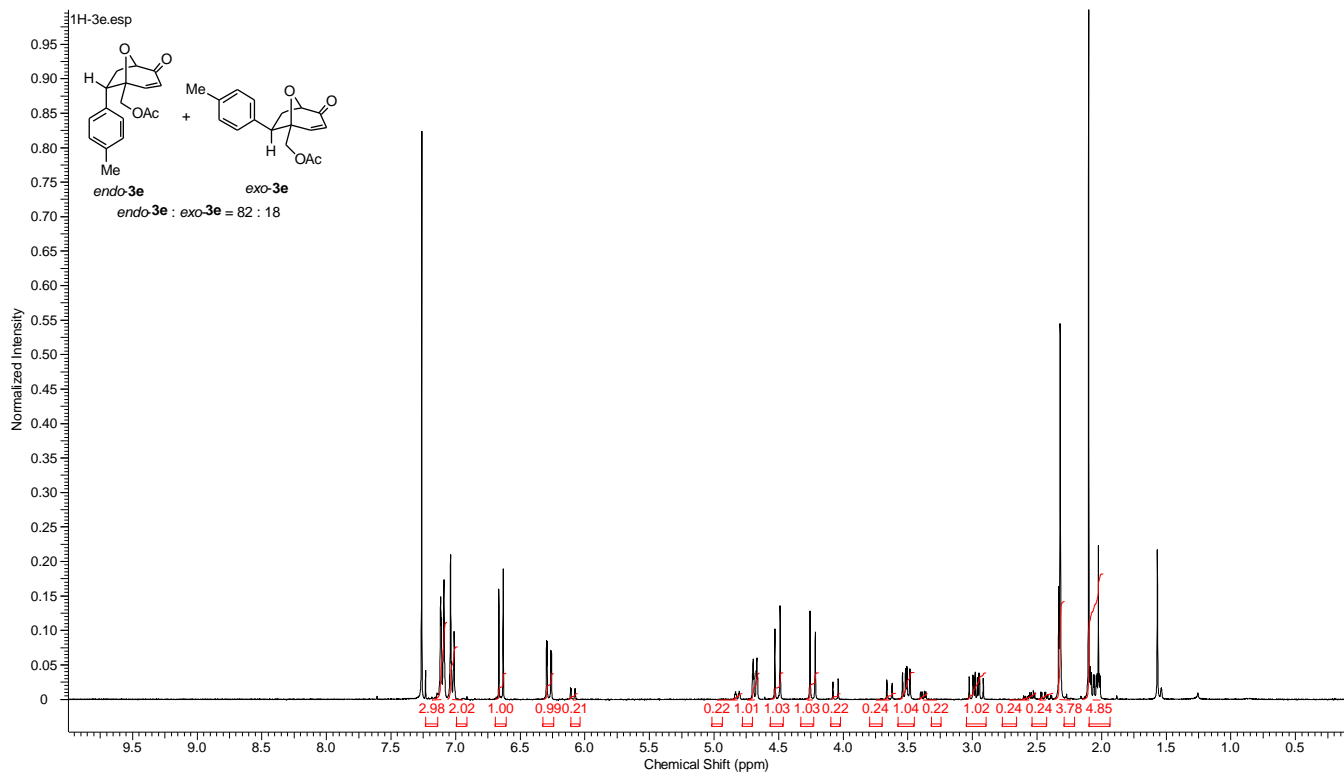

# <sup>13</sup>C NMR (125 MHz, CDCl<sub>3</sub>)

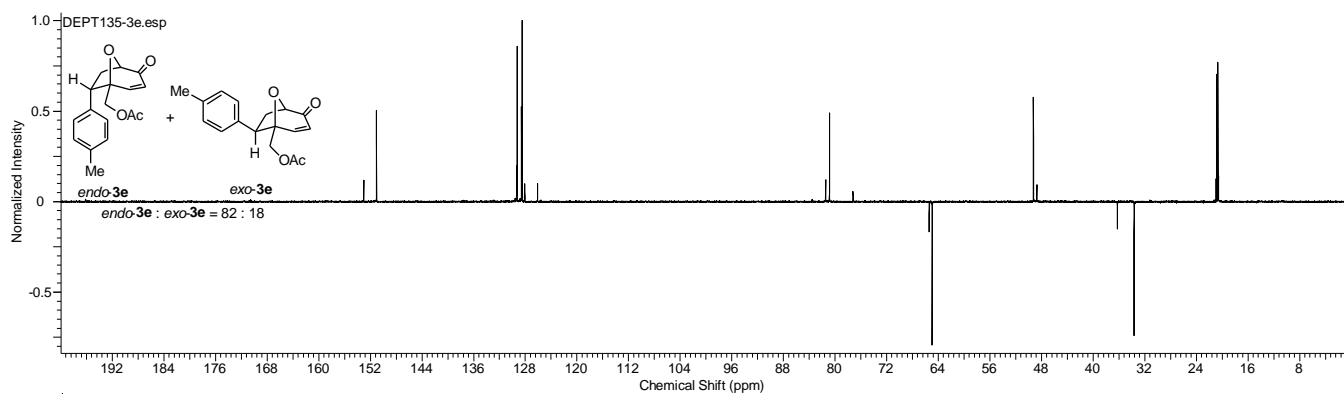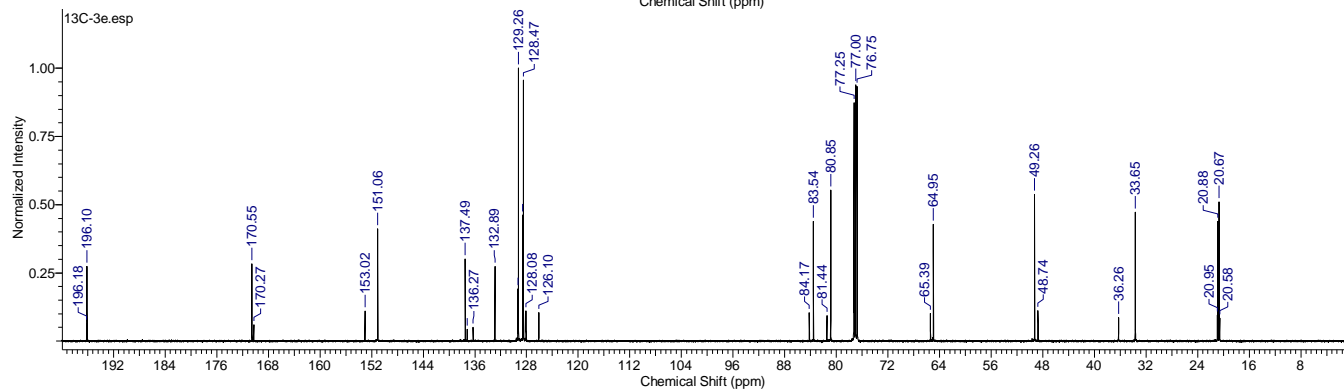

# <sup>1</sup>H NMR (300 MHz, CDCl<sub>3</sub>)

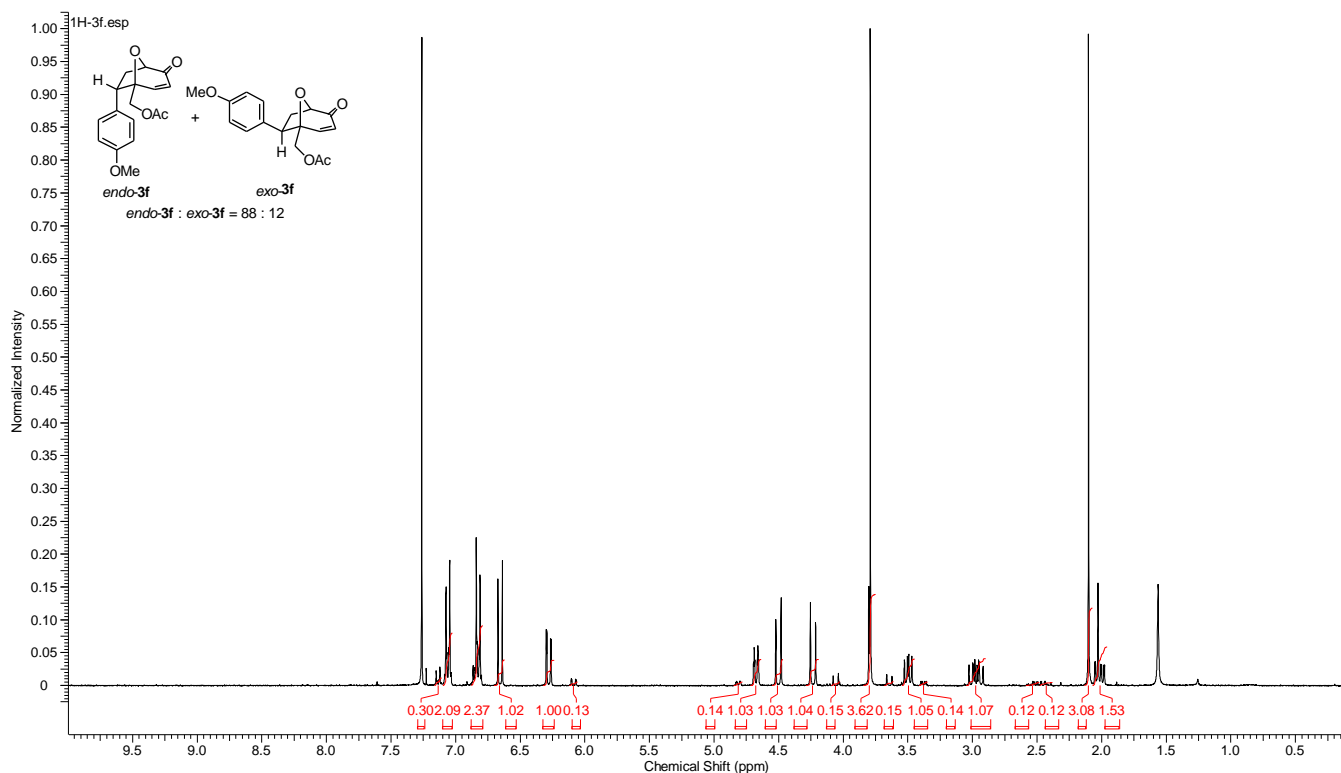

# <sup>13</sup>C NMR (125 MHz, CDCl<sub>3</sub>)

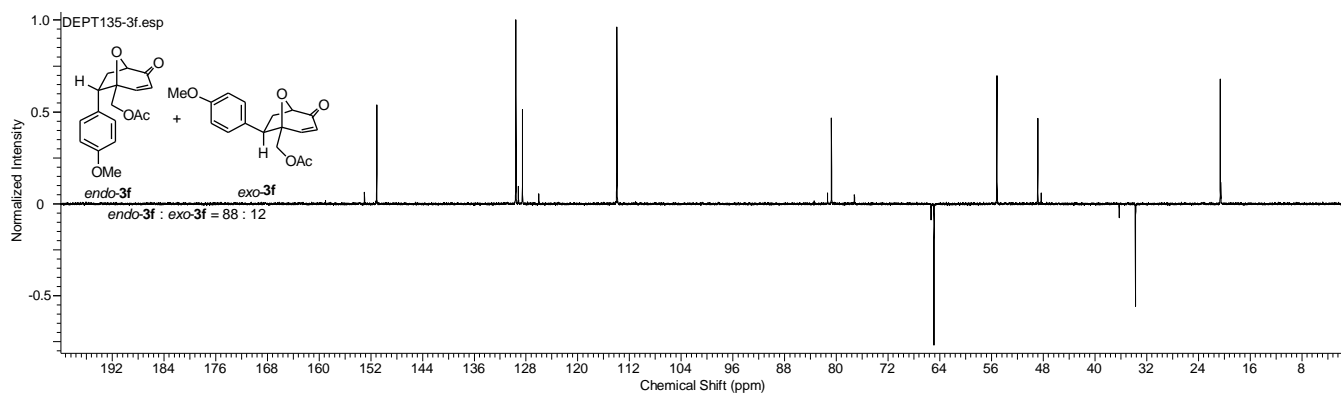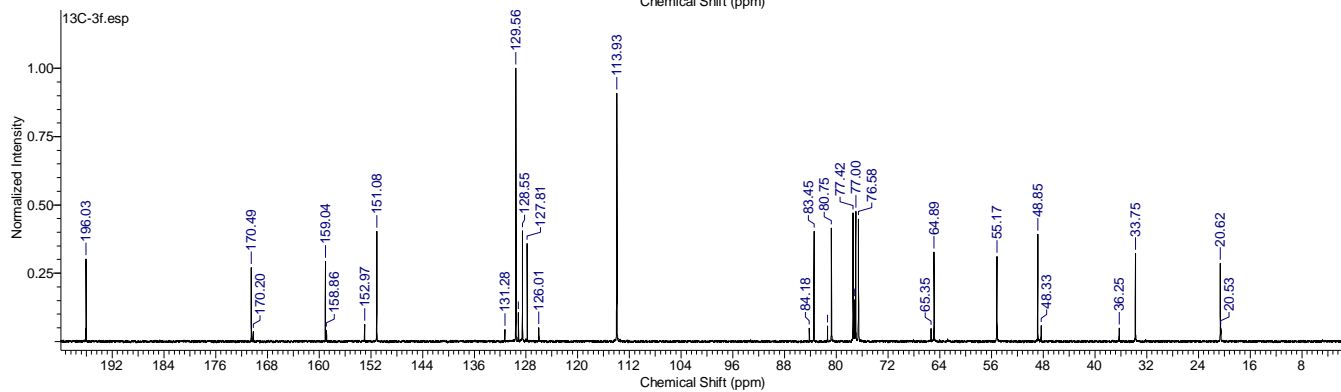



# <sup>1</sup>H NMR (300 MHz, CDCl<sub>3</sub>)

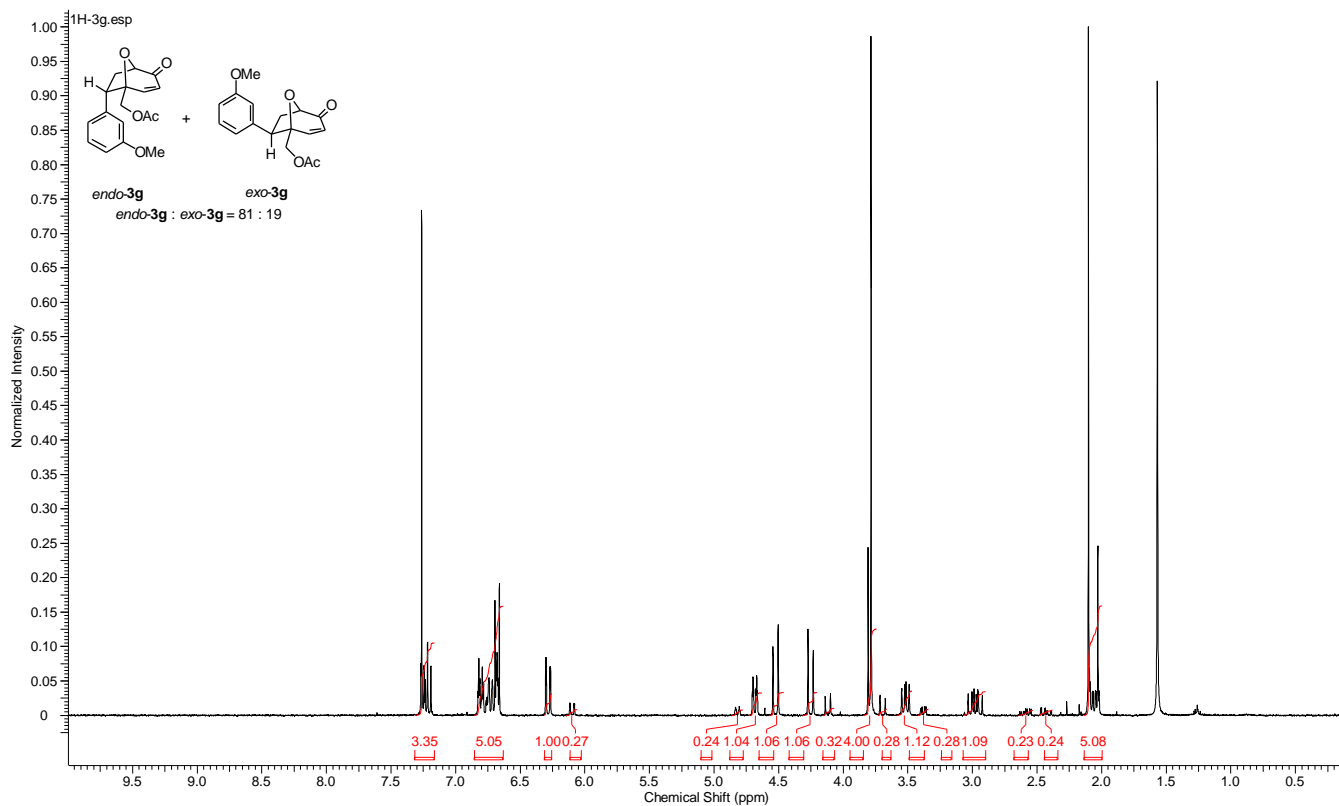

# <sup>13</sup>C NMR (125 MHz, CDCl<sub>3</sub>)

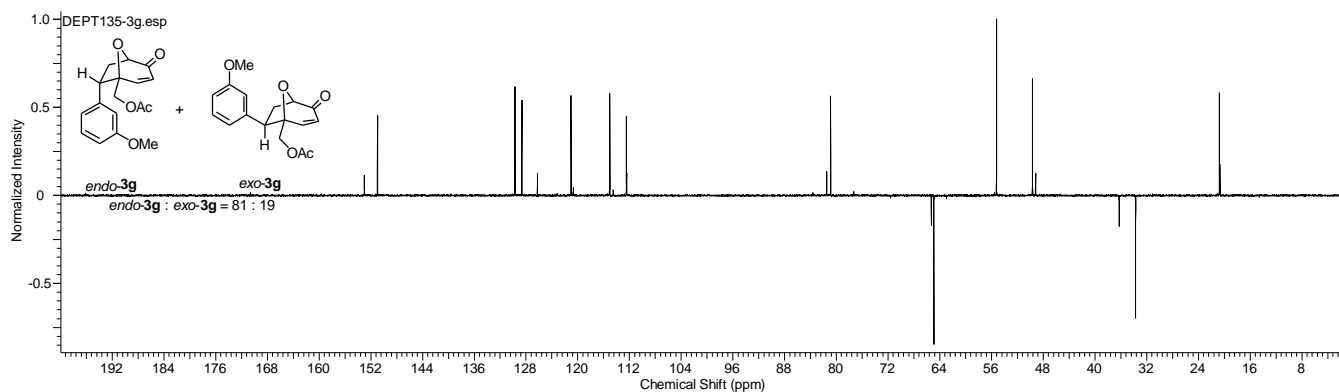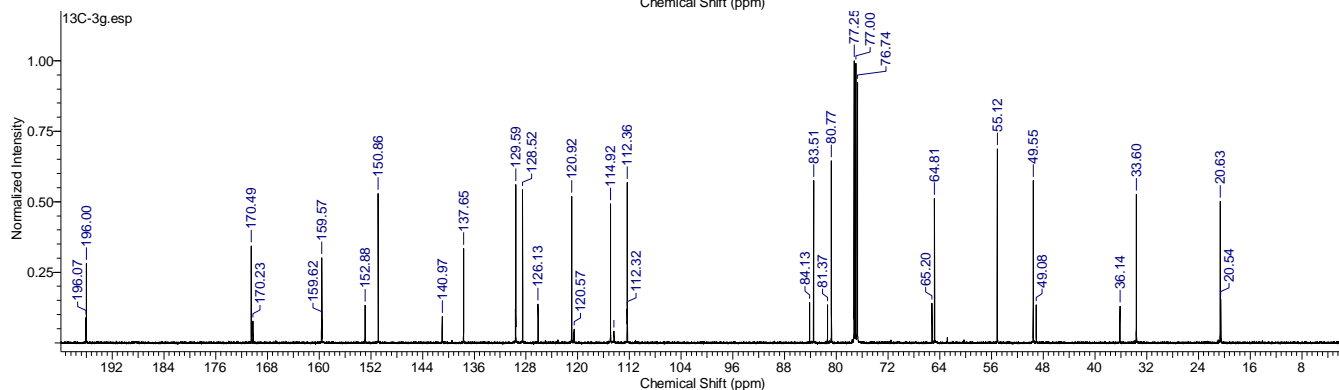

# <sup>1</sup>H NMR (500 MHz, CDCl<sub>3</sub>)

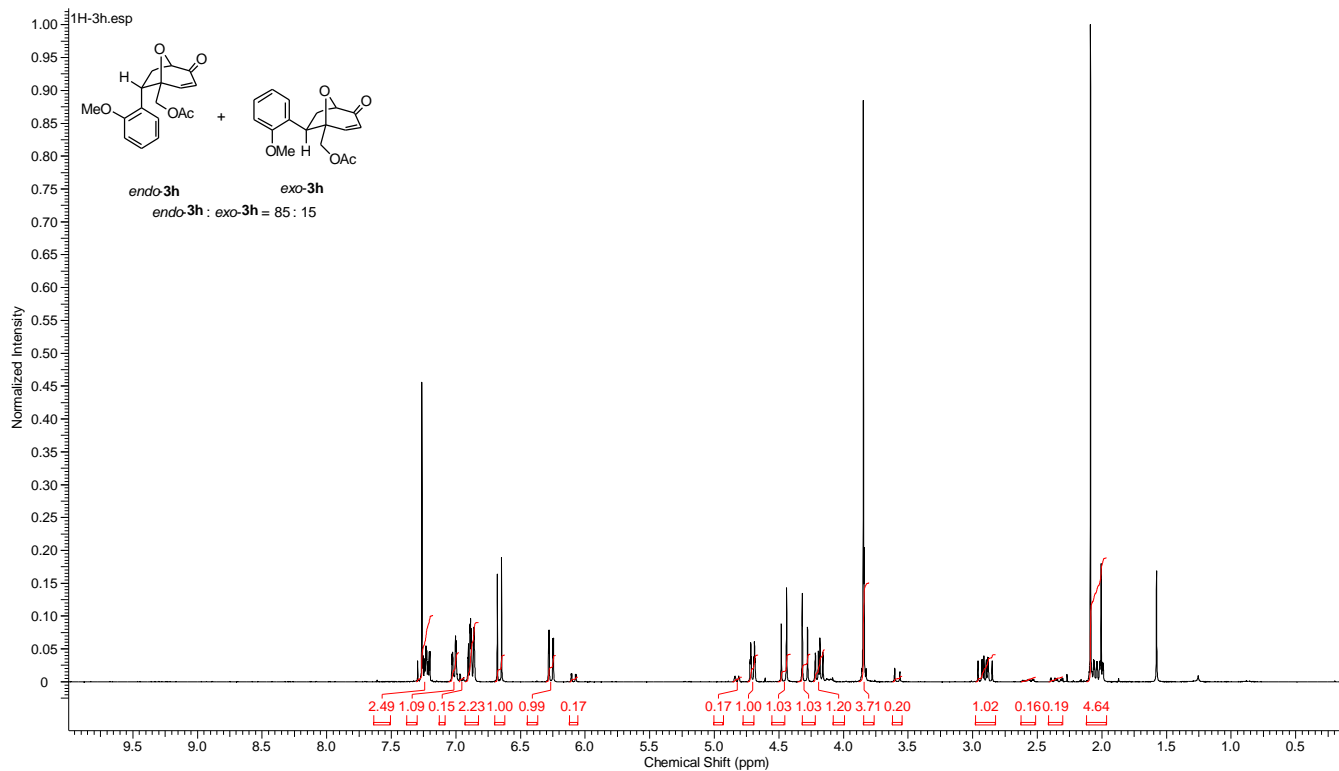

# <sup>13</sup>C NMR (125 MHz, CDCl<sub>3</sub>)

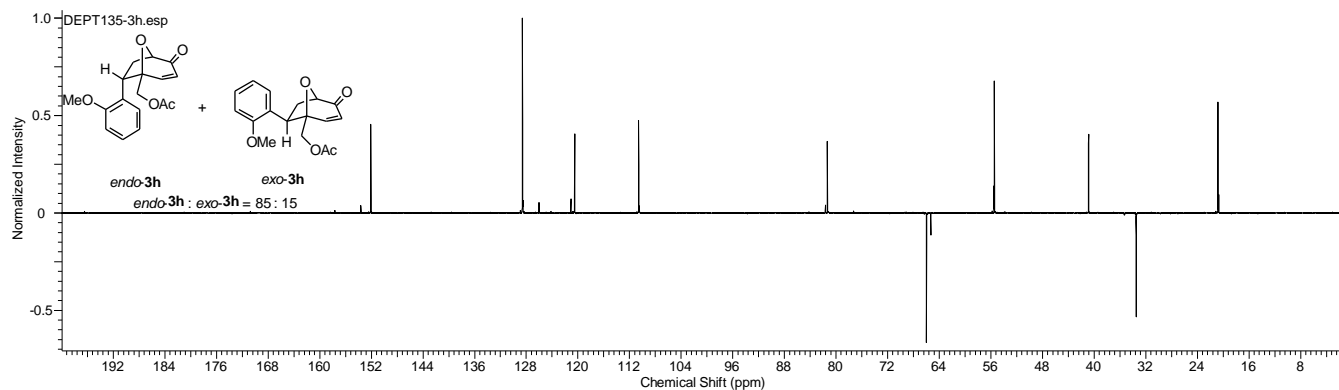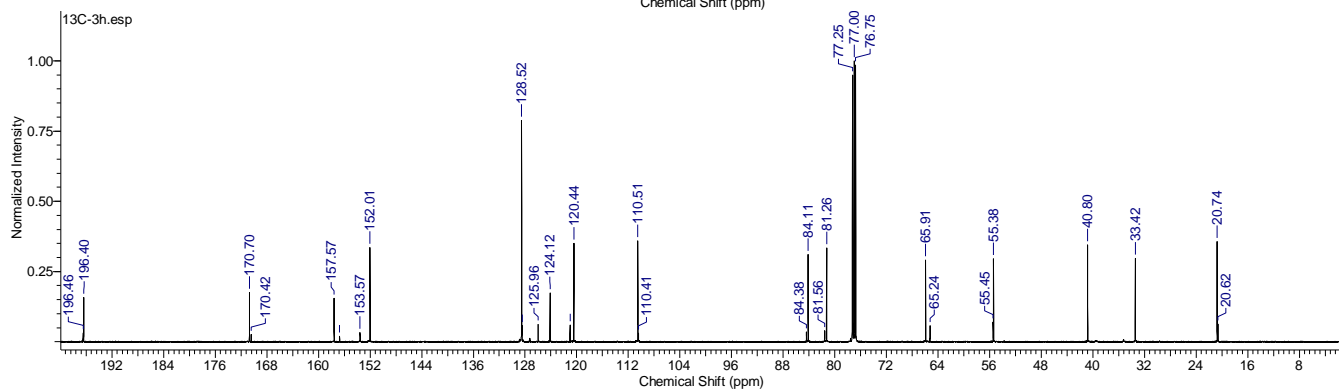

# <sup>1</sup>H NMR (500 MHz, CDCl<sub>3</sub>)

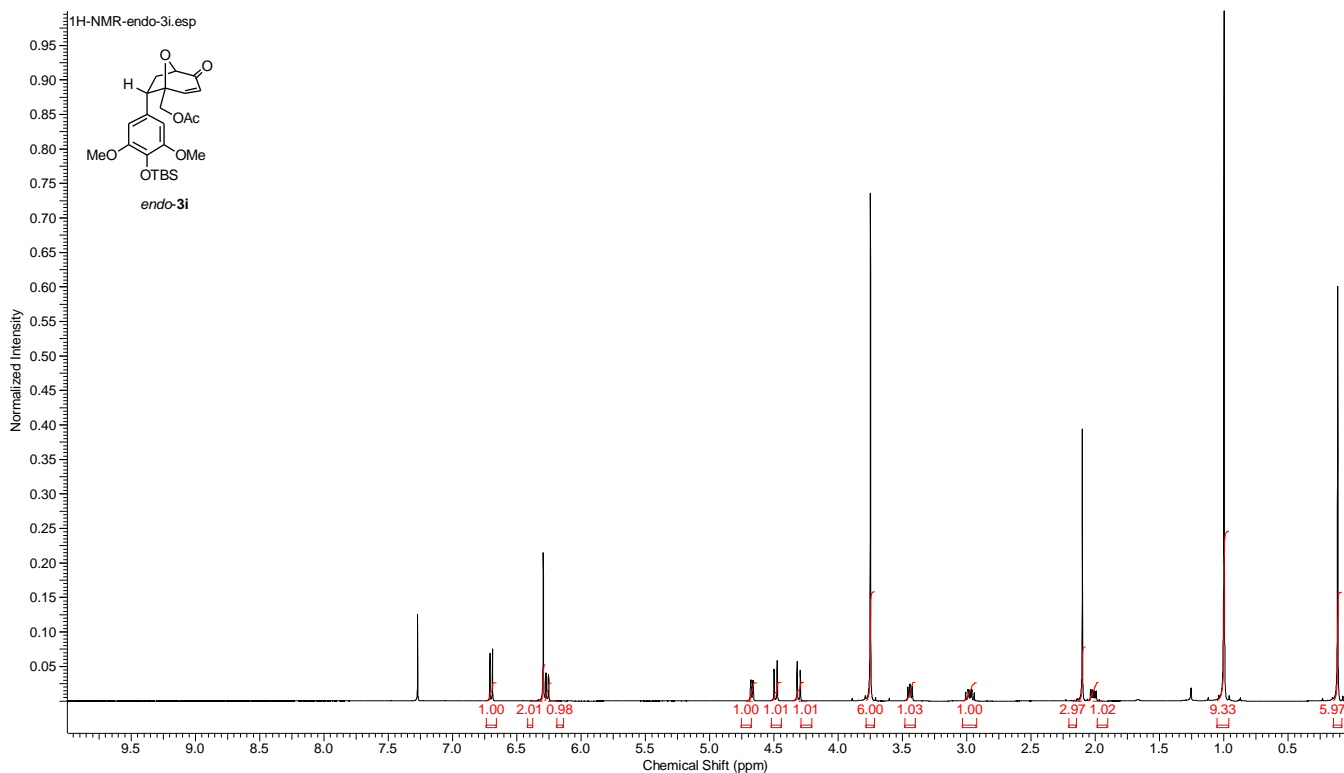

# <sup>13</sup>C NMR (125 MHz, CDCl<sub>3</sub>)

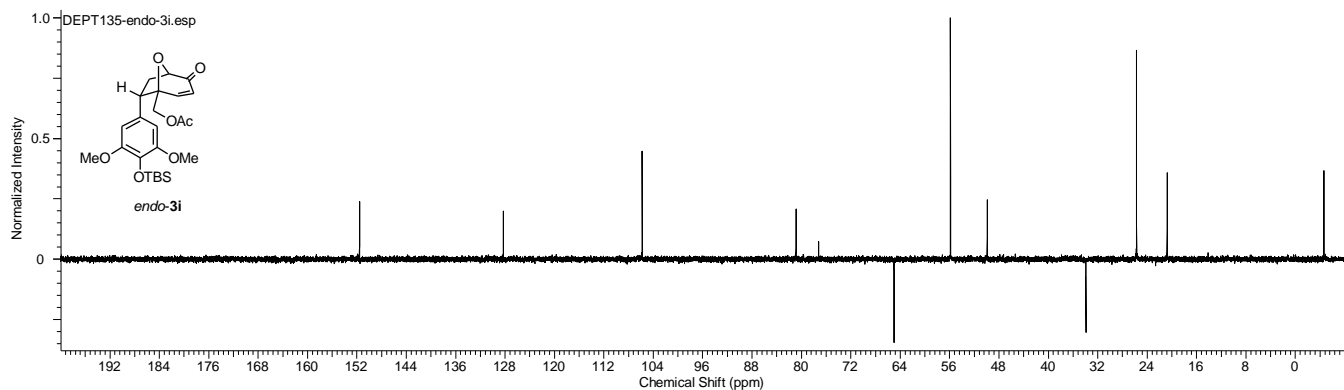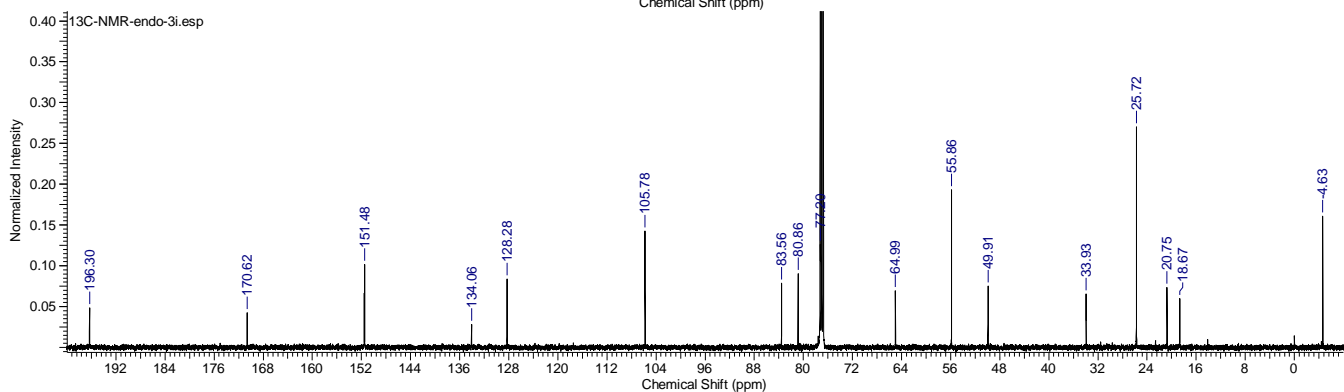

# <sup>1</sup>H NMR (500 MHz, CDCl<sub>3</sub>)

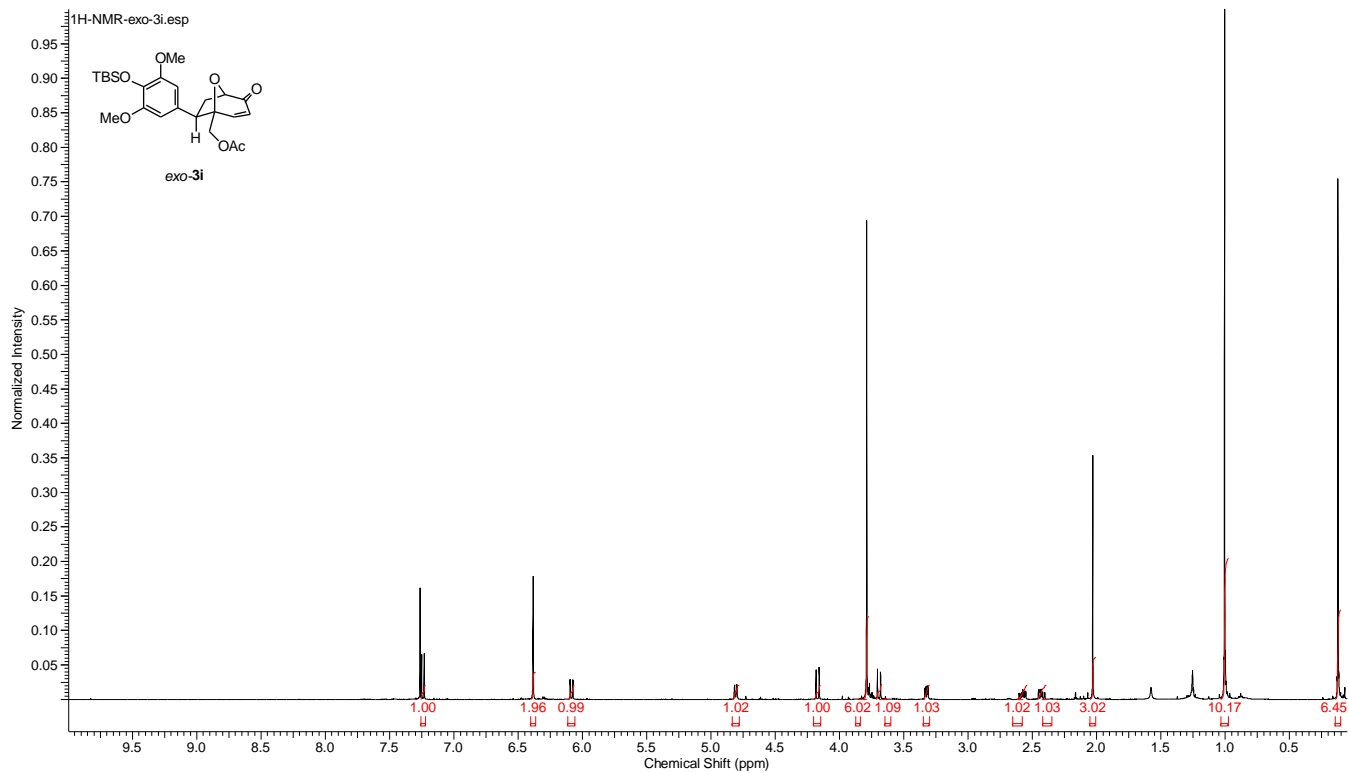

# <sup>13</sup>C NMR (125 MHz, CDCl<sub>3</sub>)

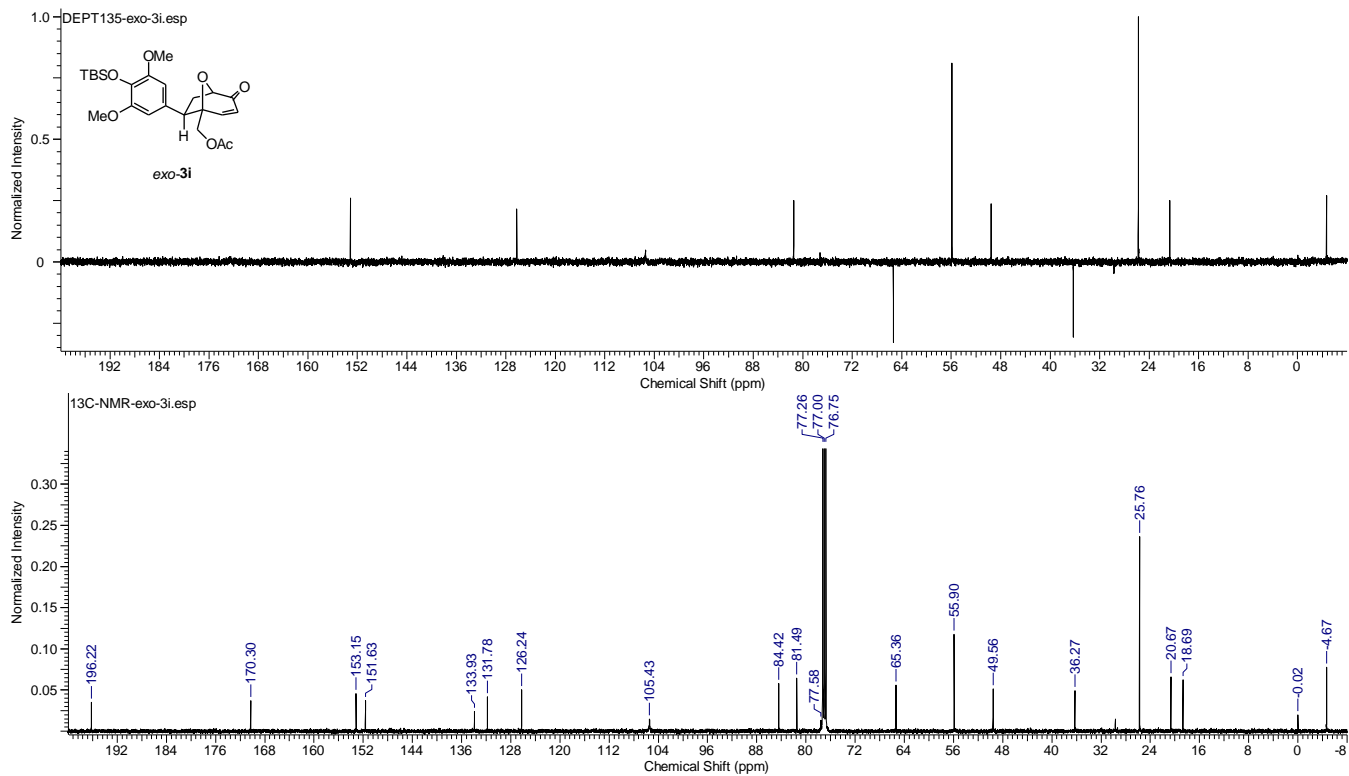

# $^1\text{H}$ NMR (300 MHz, $\text{CDCl}_3$ )

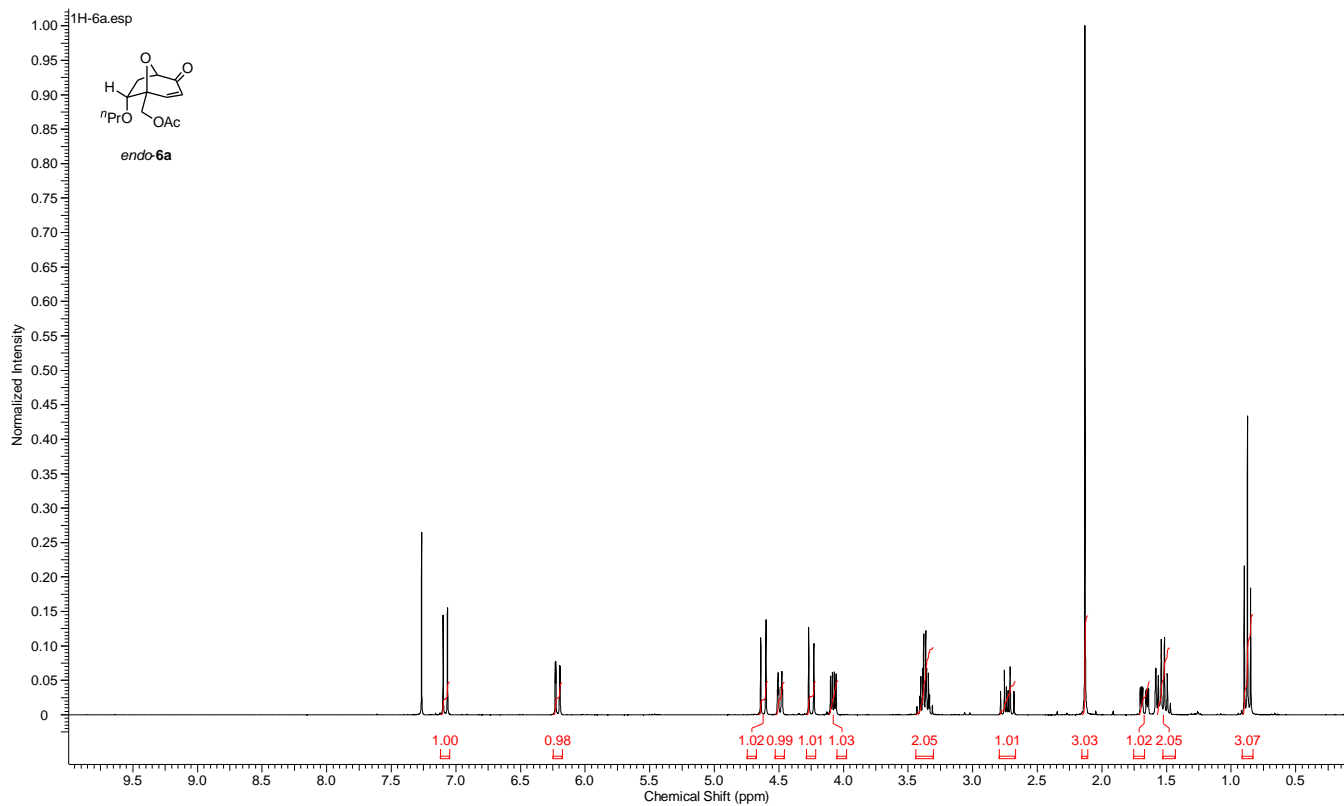

# $^{13}\text{C}$ NMR (125 MHz, $\text{CDCl}_3$ )

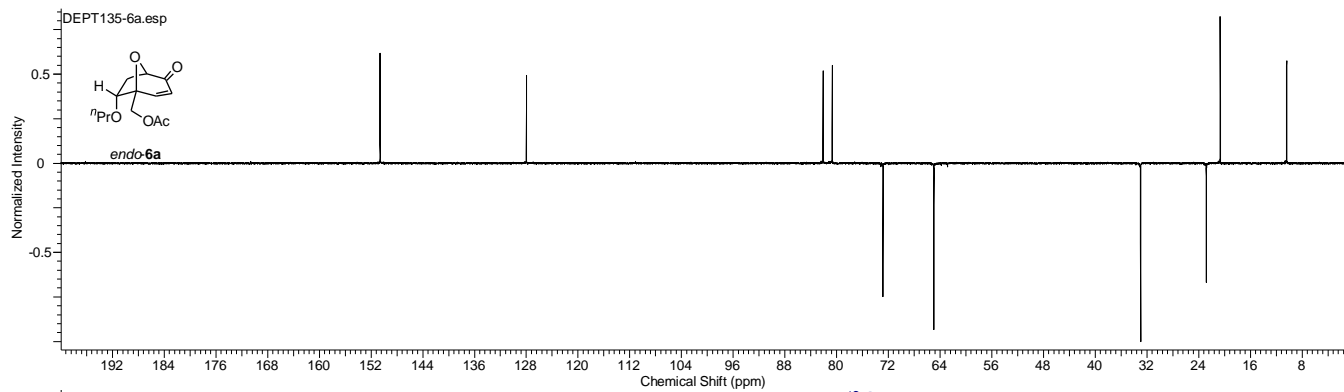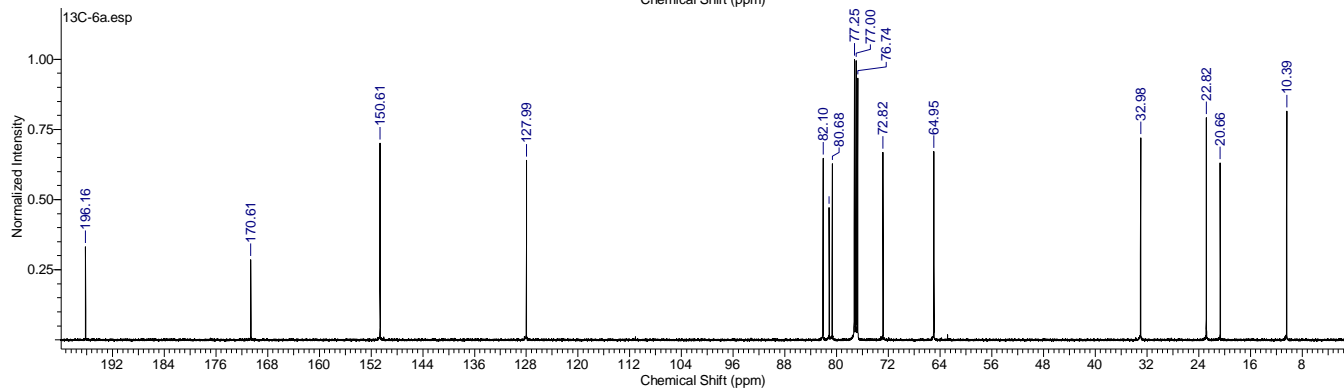

# <sup>1</sup>H NMR (300 MHz, CDCl<sub>3</sub>)

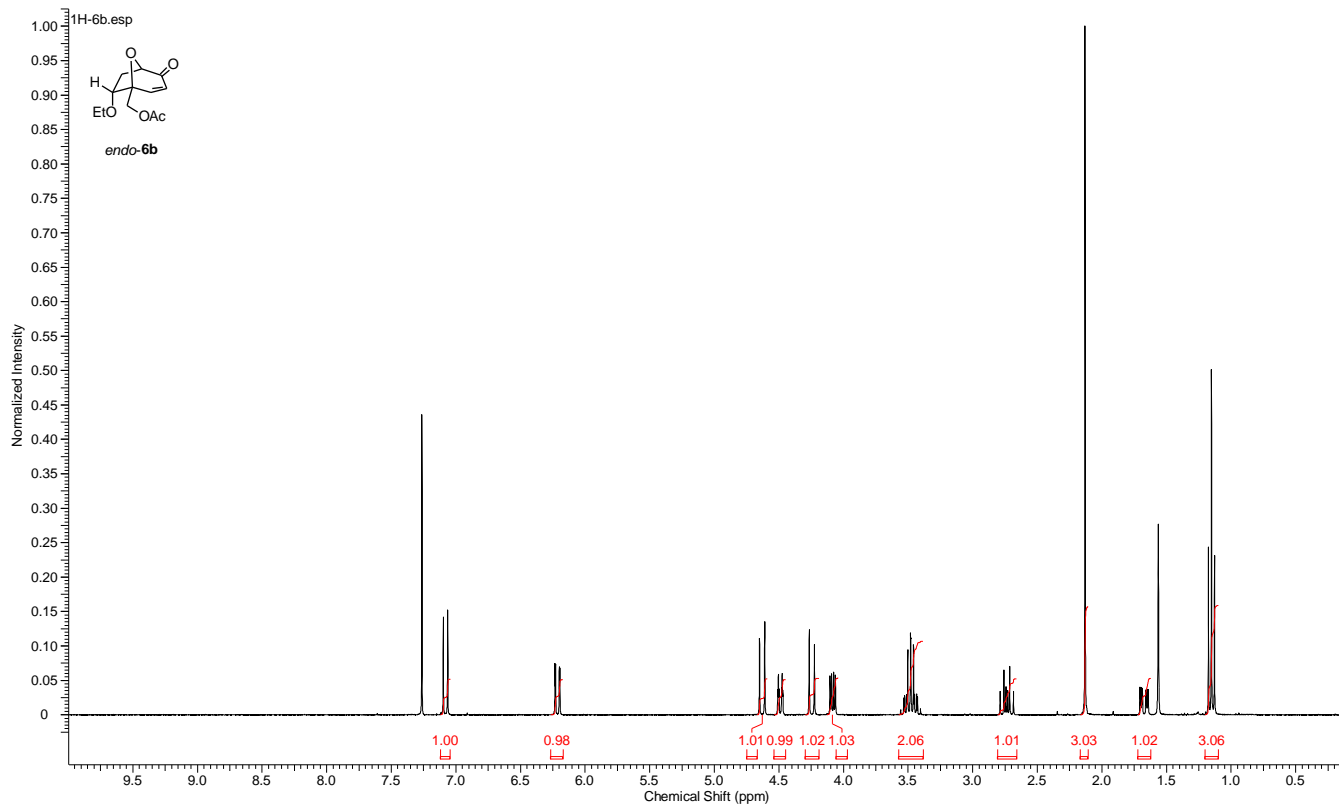

# <sup>13</sup>C NMR (75 MHz, CDCl<sub>3</sub>)

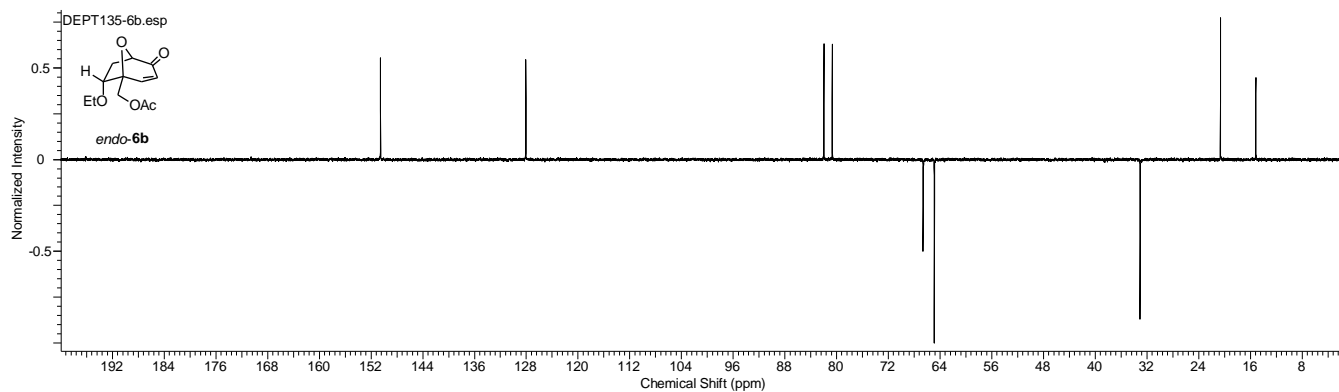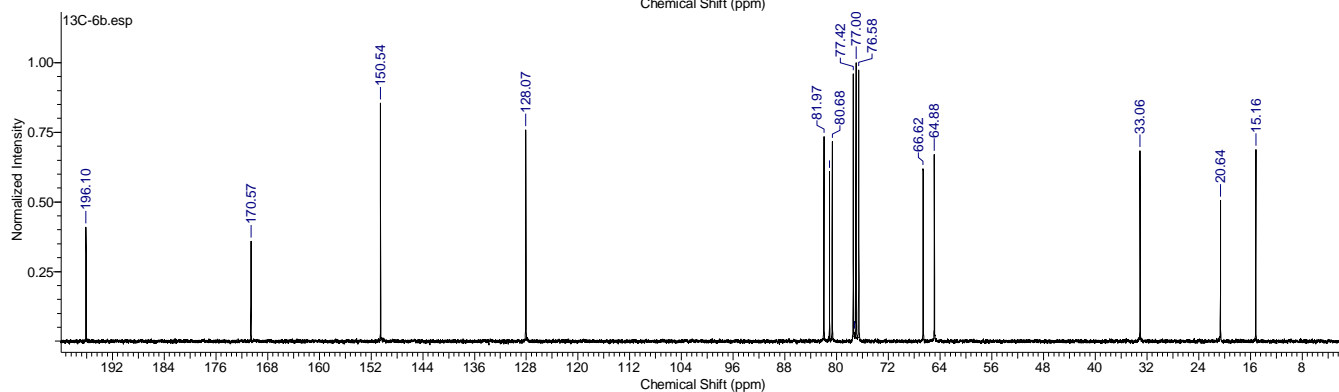

# <sup>1</sup>H NMR (300 MHz, CDCl<sub>3</sub>)

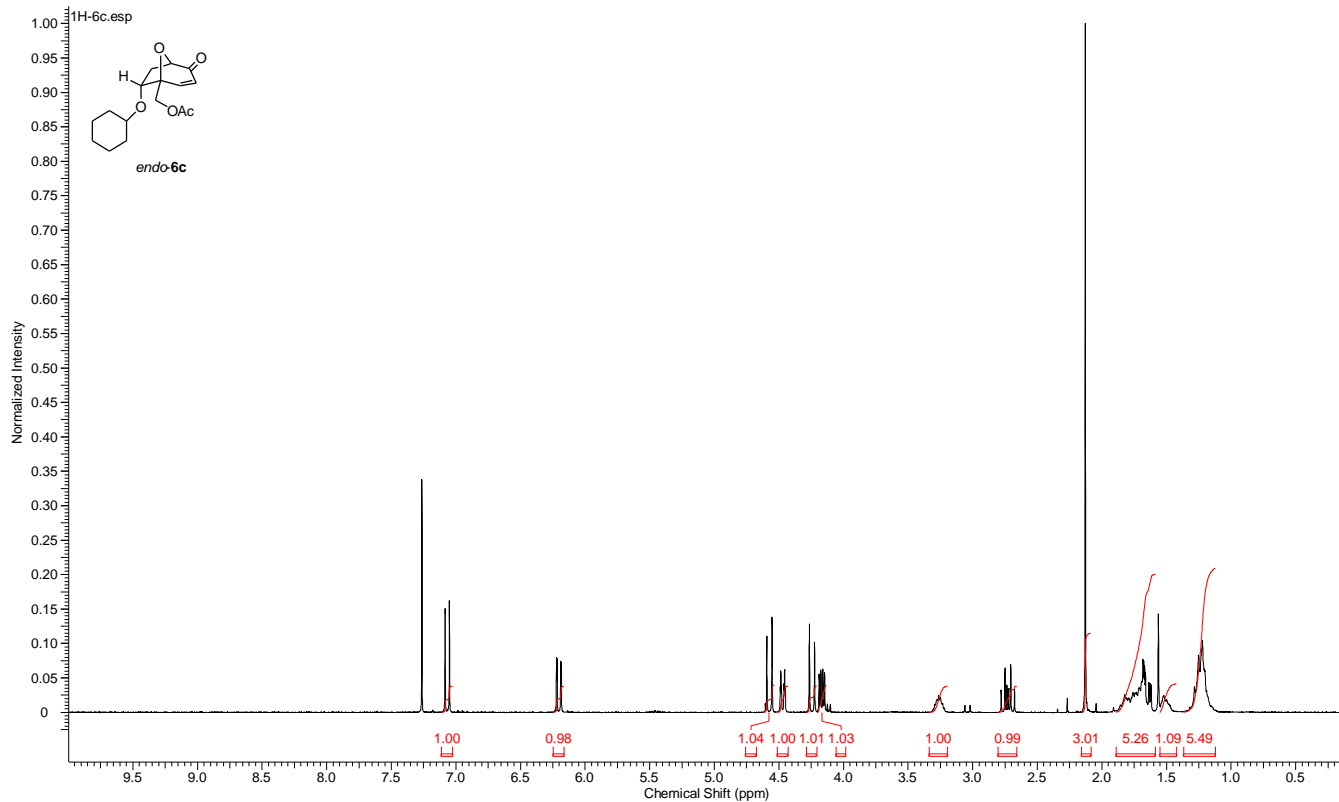

# <sup>13</sup>C NMR (75 MHz, CDCl<sub>3</sub>)

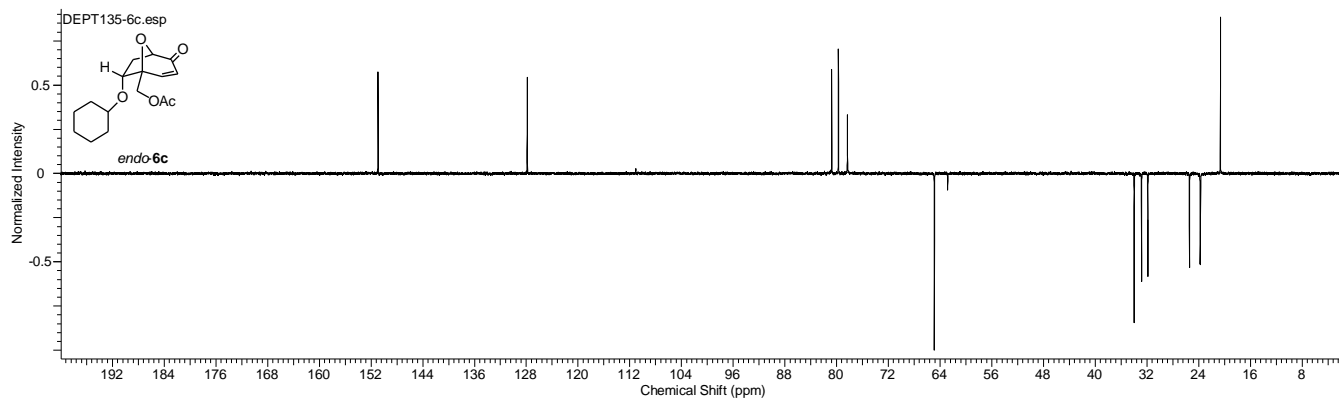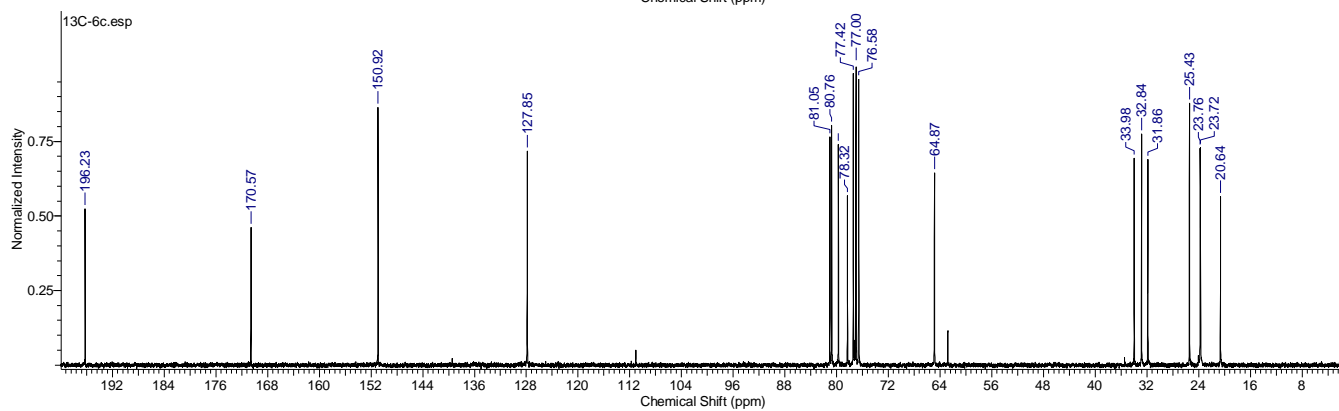

# <sup>1</sup>H NMR (300 MHz, CDCl<sub>3</sub>)

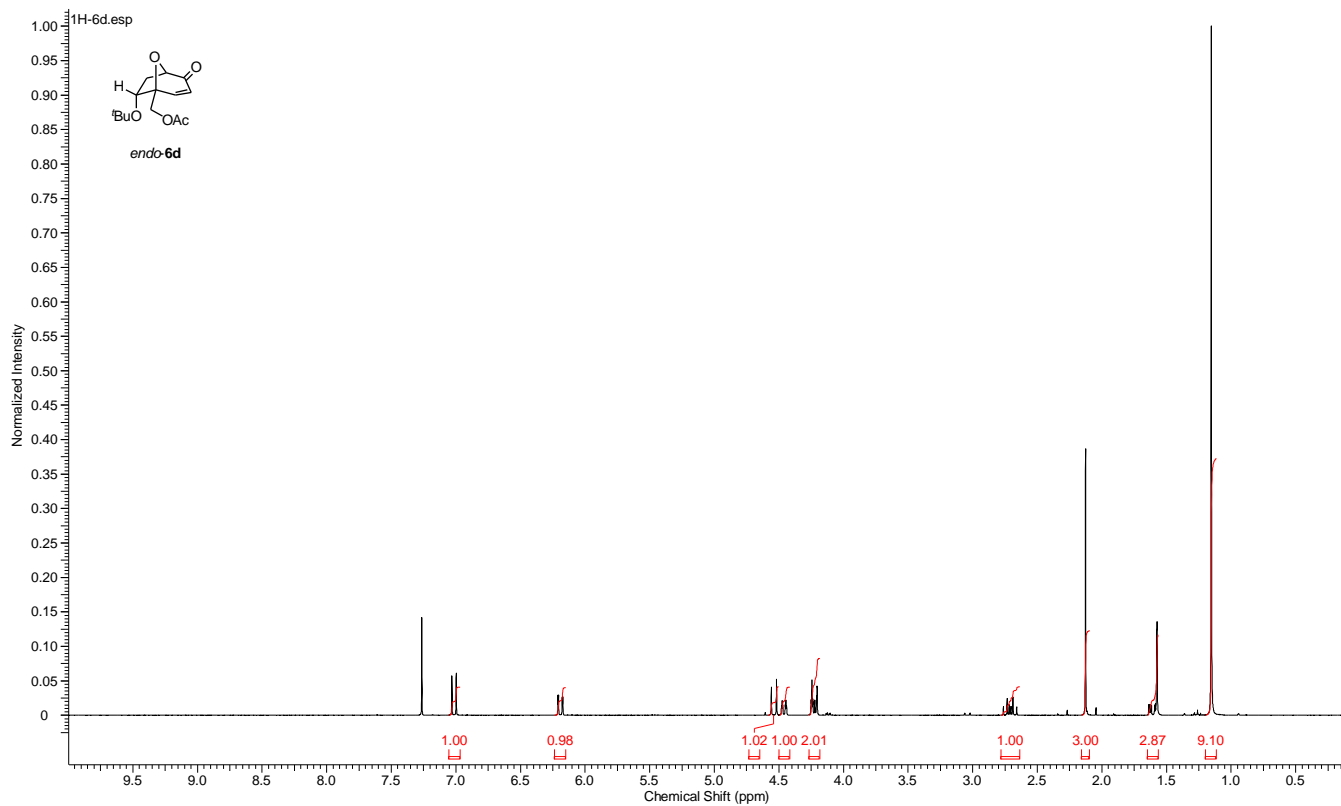

# <sup>13</sup>C NMR (75 MHz, CDCl<sub>3</sub>)

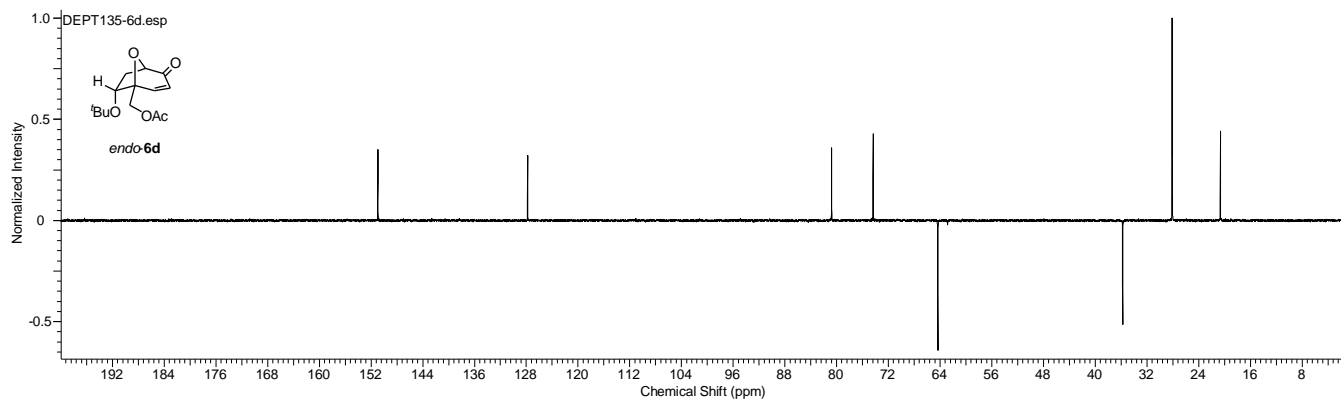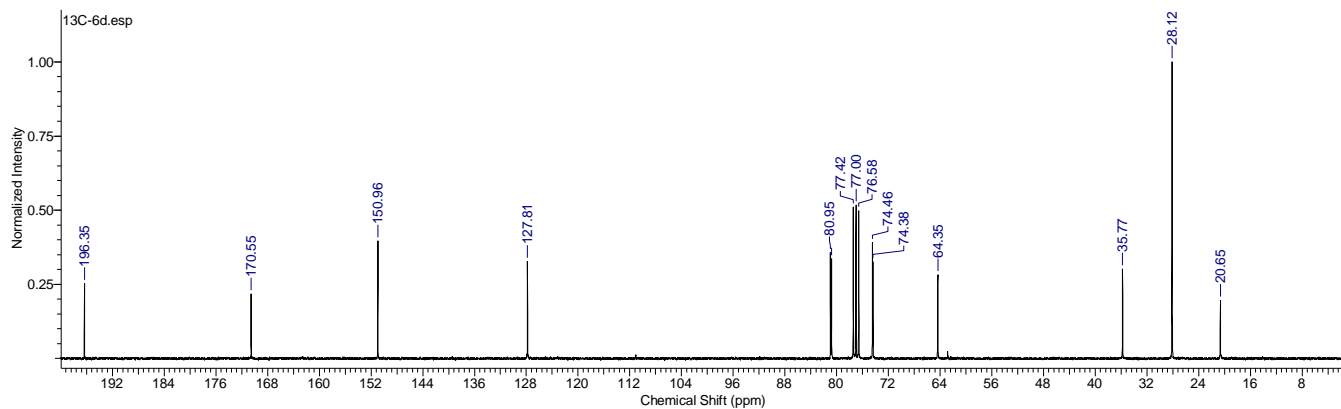



# <sup>1</sup>H NMR (300 MHz, CDCl<sub>3</sub>)

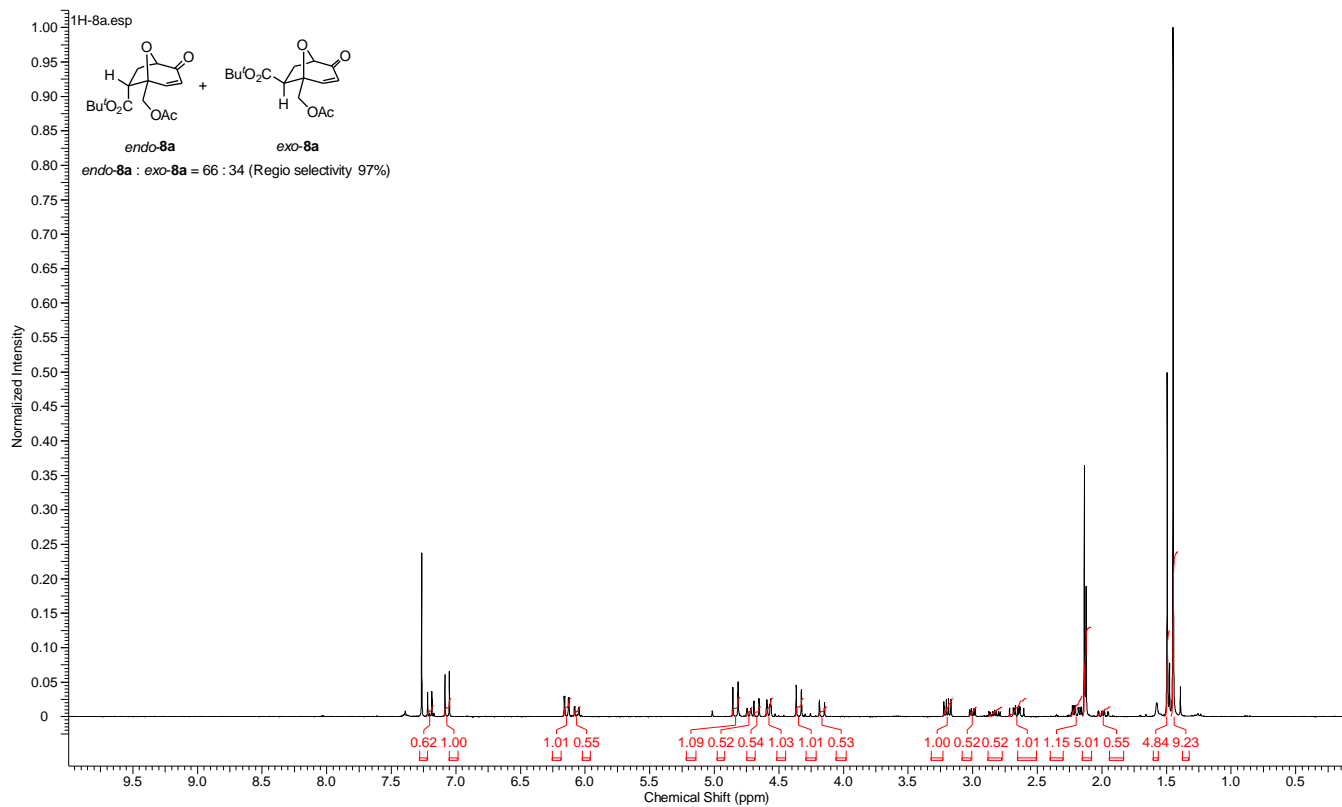

# <sup>13</sup>C NMR (125 MHz, CDCl<sub>3</sub>)

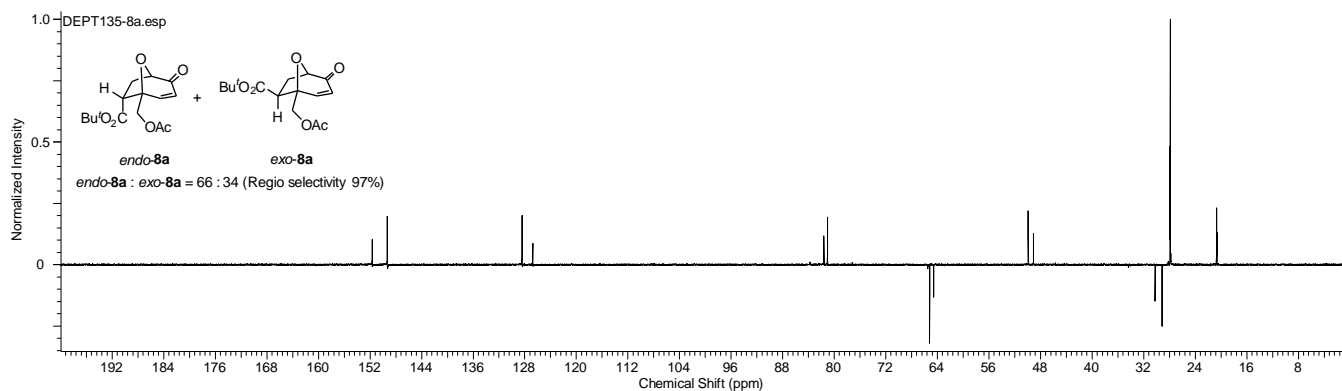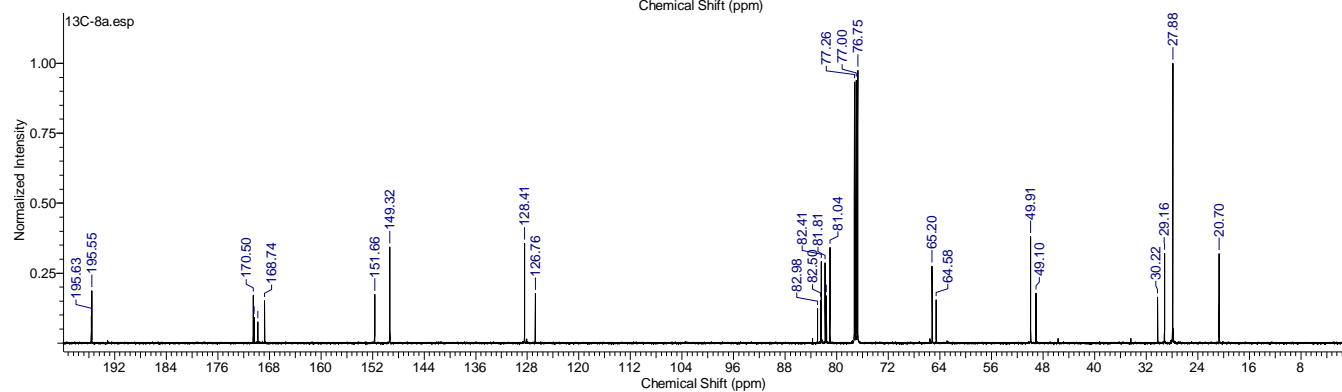

# <sup>1</sup>H NMR (300 MHz, CDCl<sub>3</sub>)

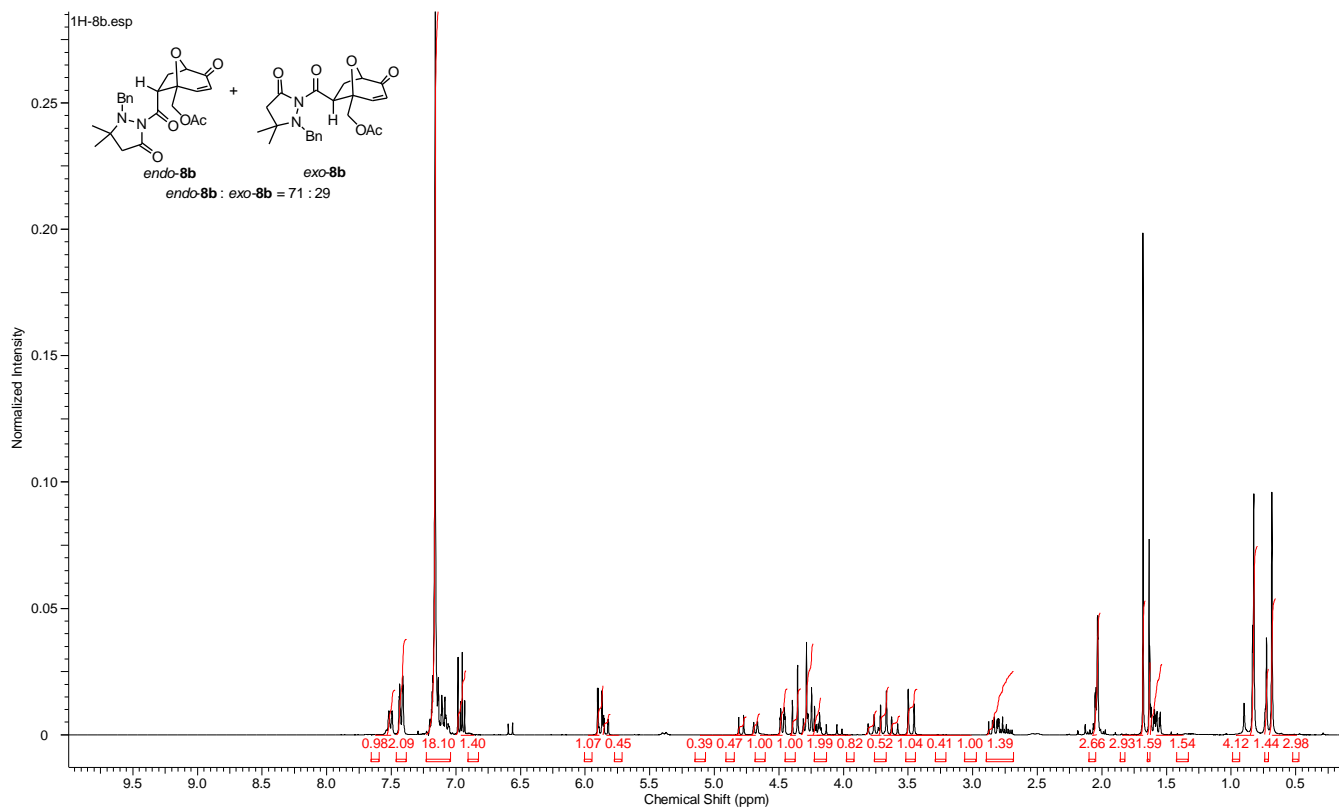

# <sup>13</sup>C NMR (75 MHz, CDCl<sub>3</sub>)

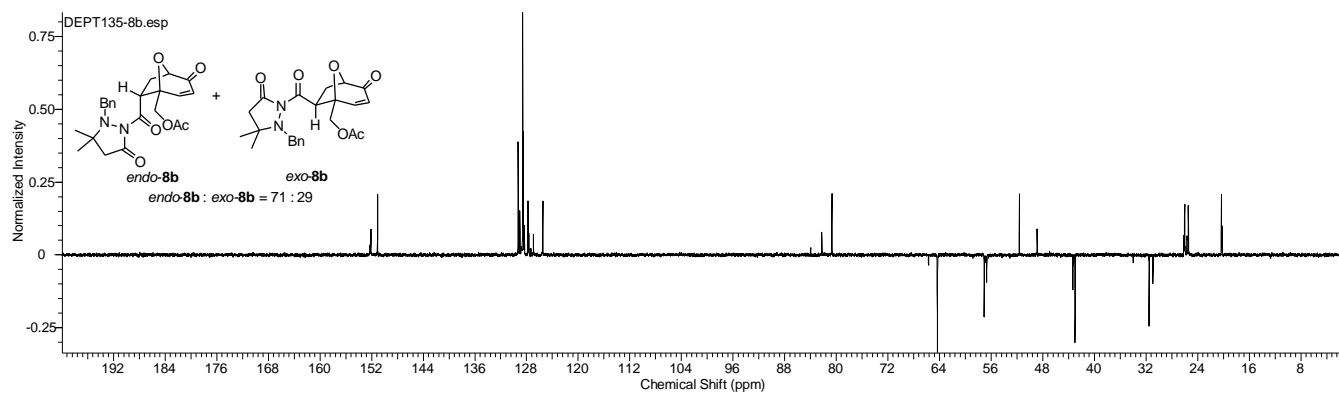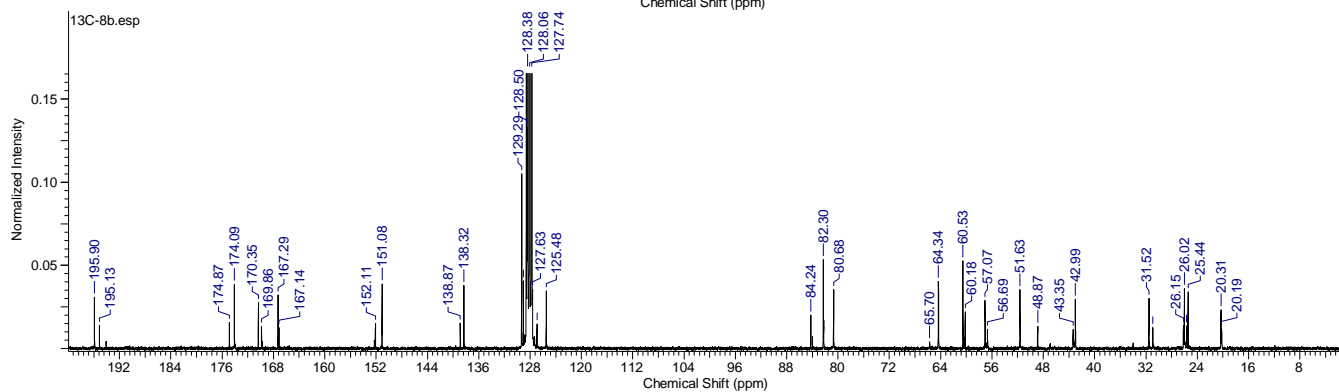

# <sup>1</sup>H NMR (300 MHz, CDCl<sub>3</sub>)

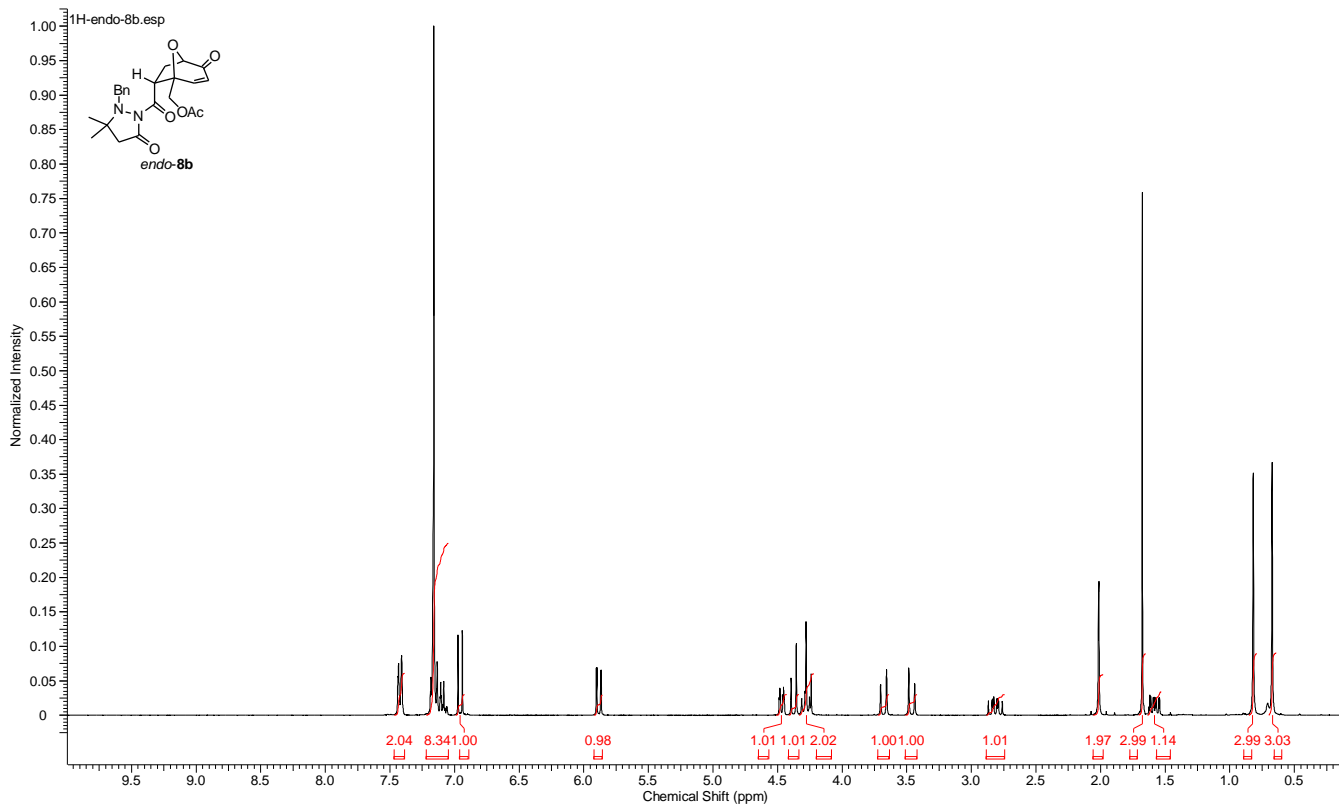

# <sup>13</sup>C NMR (75 MHz, CDCl<sub>3</sub>)

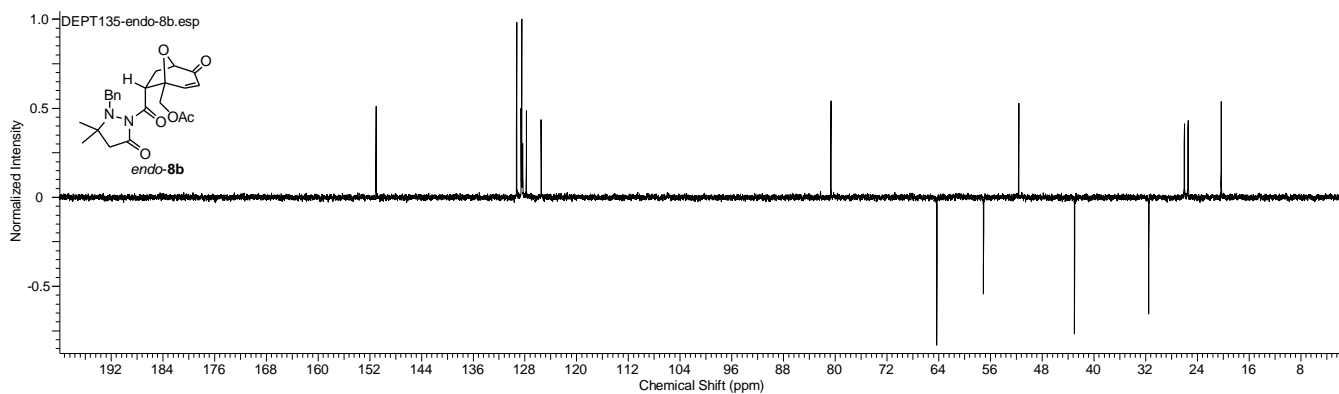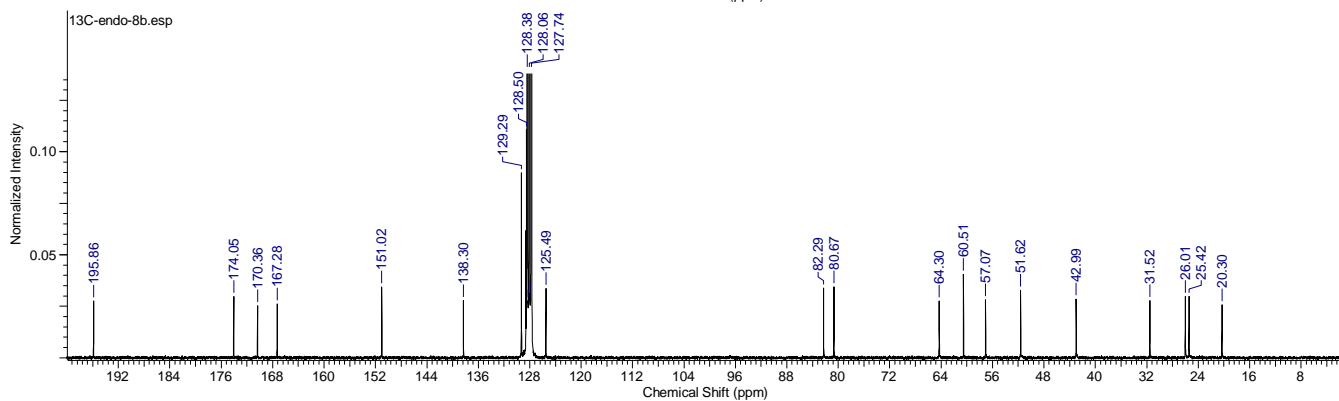

# <sup>1</sup>H NMR (300 MHz, CDCl<sub>3</sub>)

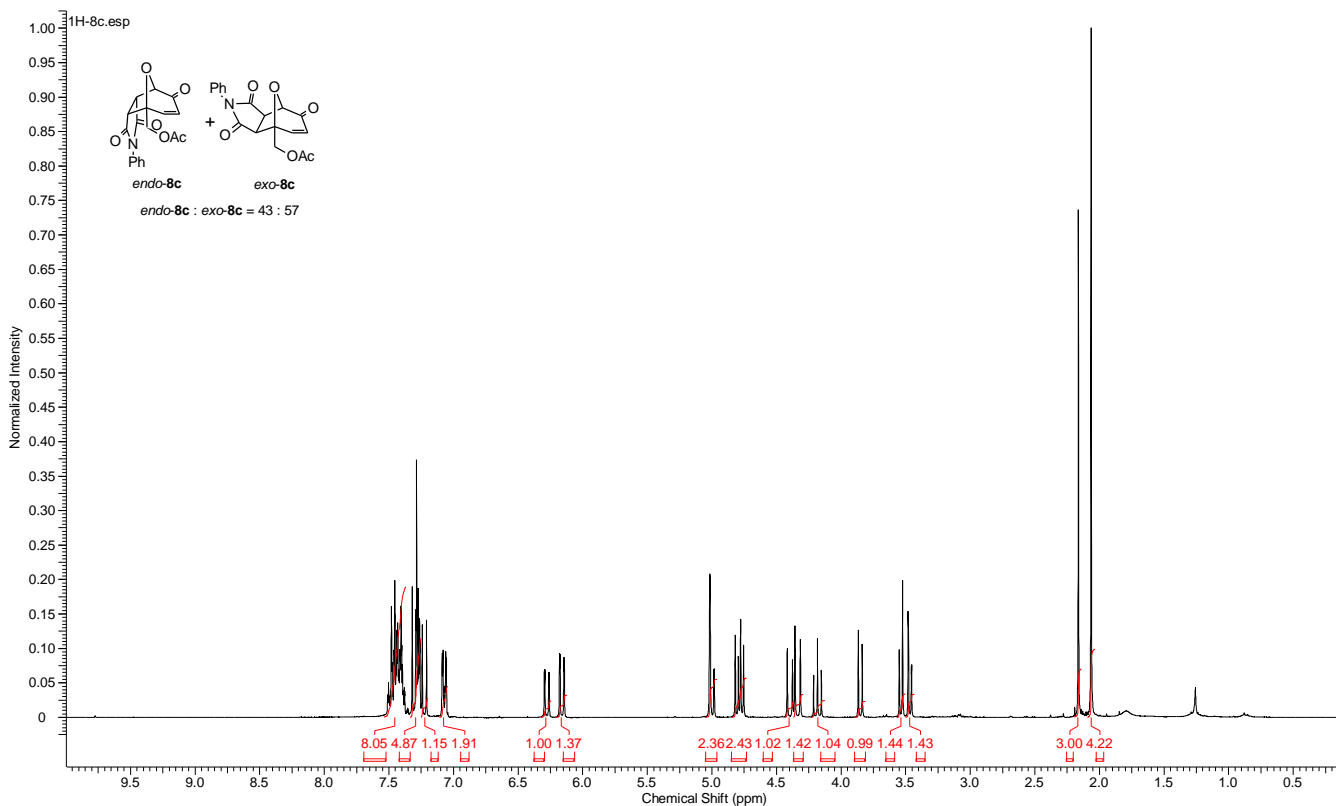

# <sup>13</sup>C NMR (75 MHz, CDCl<sub>3</sub>)

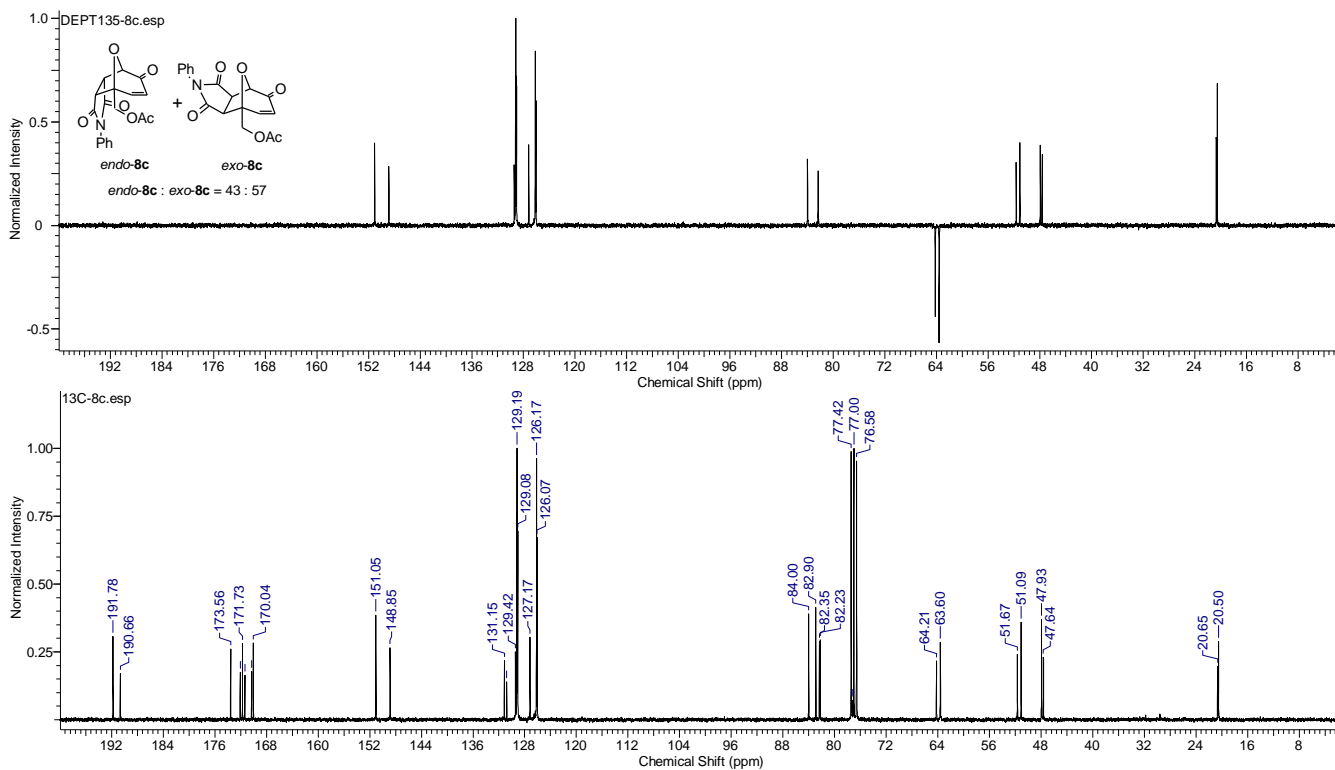

# <sup>1</sup>H NMR (300 MHz, CDCl<sub>3</sub>)

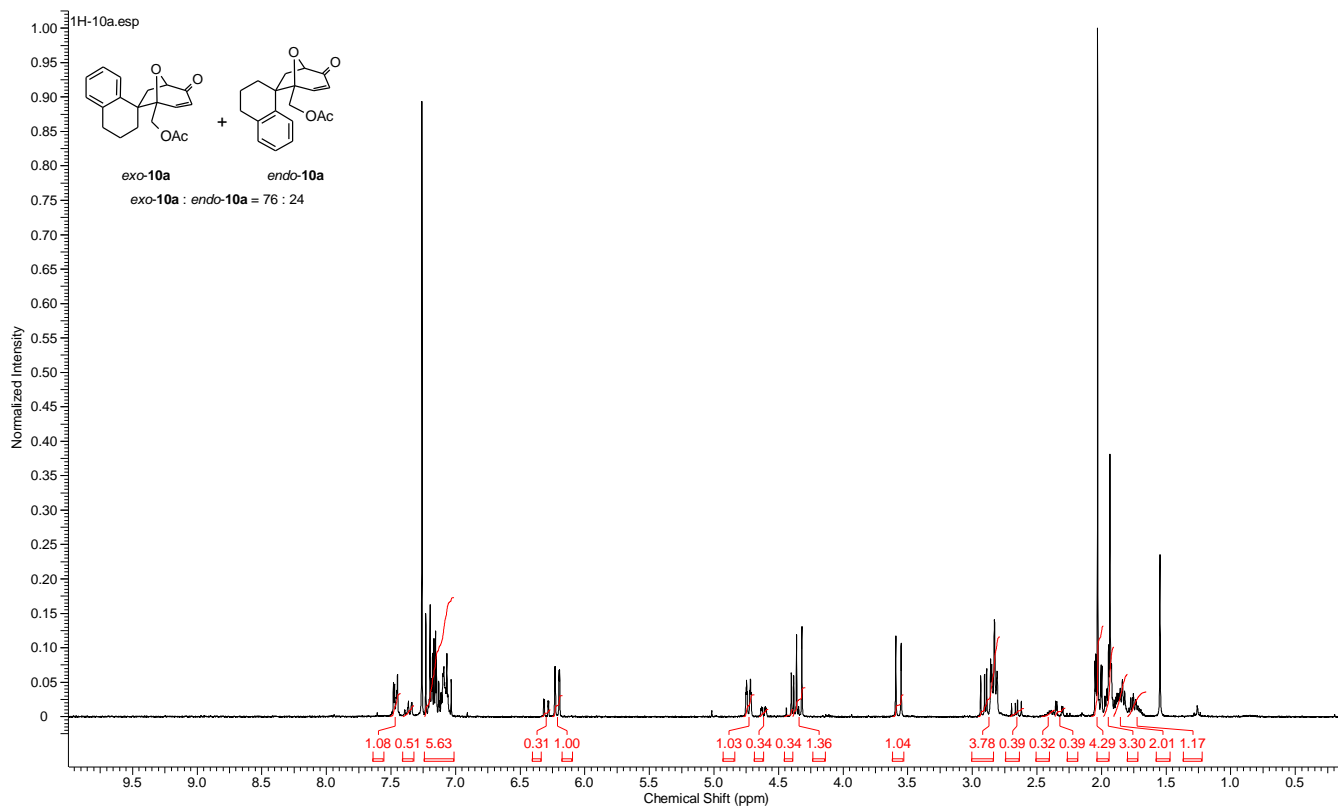

# <sup>13</sup>C NMR (75 MHz, CDCl<sub>3</sub>)

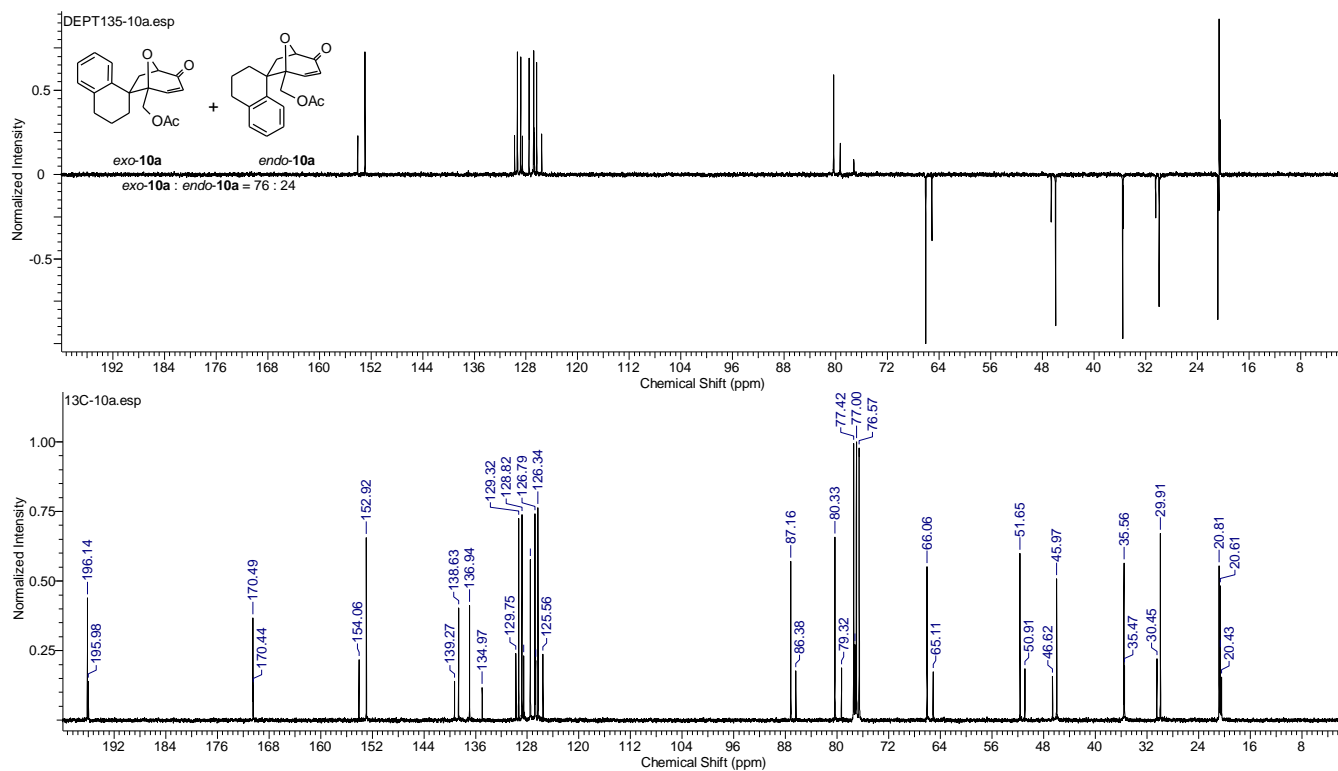

# <sup>1</sup>H NMR (300 MHz, CDCl<sub>3</sub>)

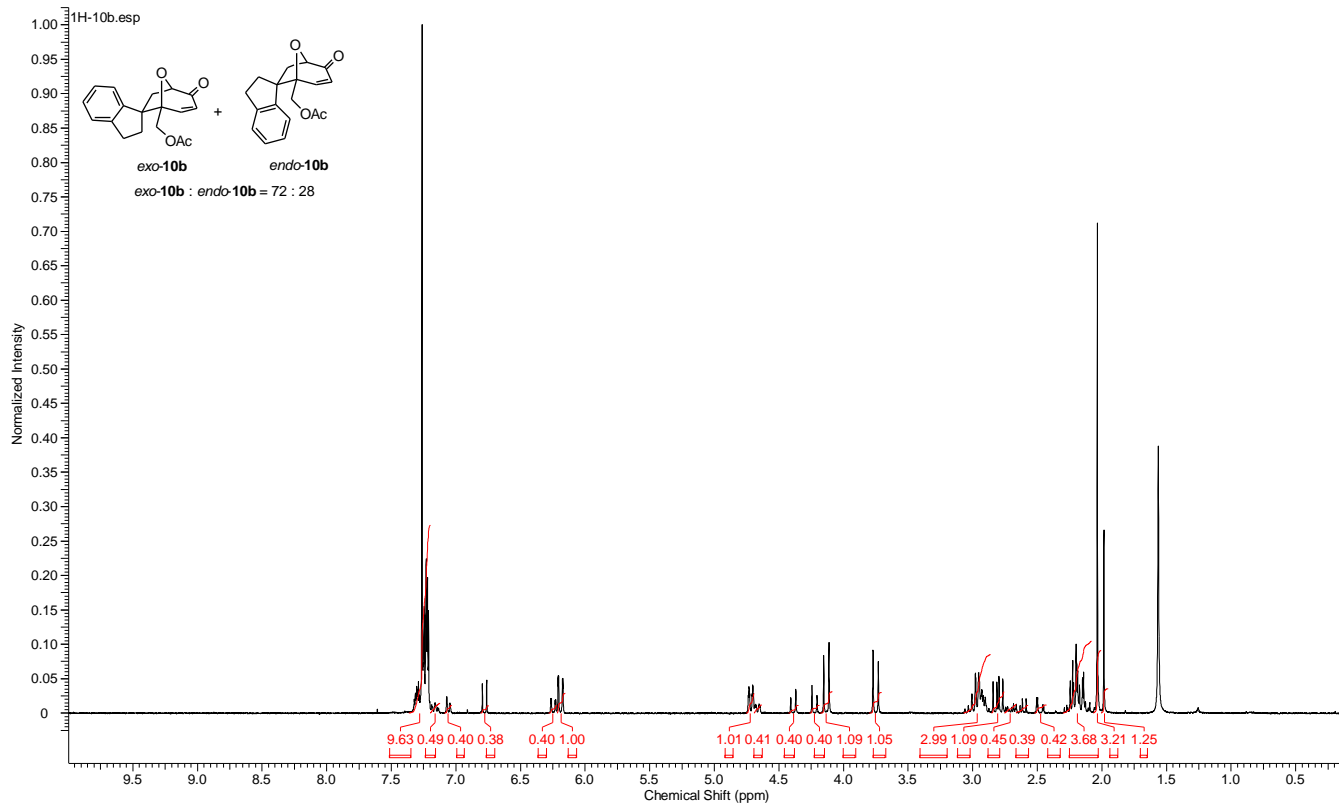

# <sup>13</sup>C NMR (75 MHz, CDCl<sub>3</sub>)

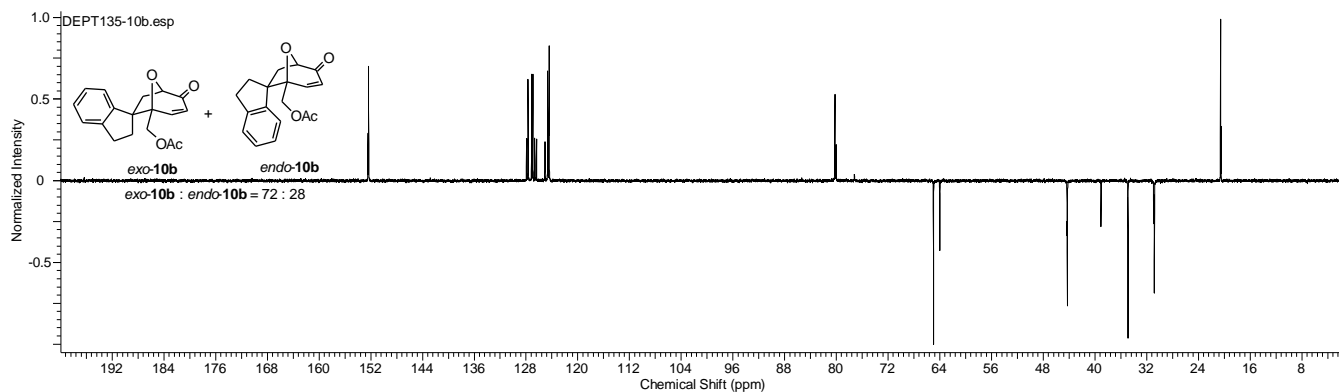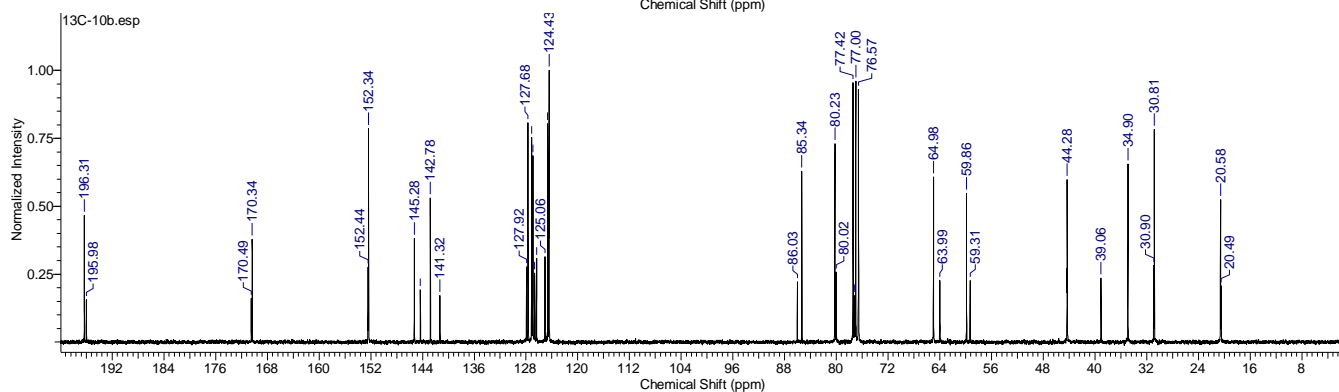

# <sup>1</sup>H NMR (300 MHz, CDCl<sub>3</sub>)

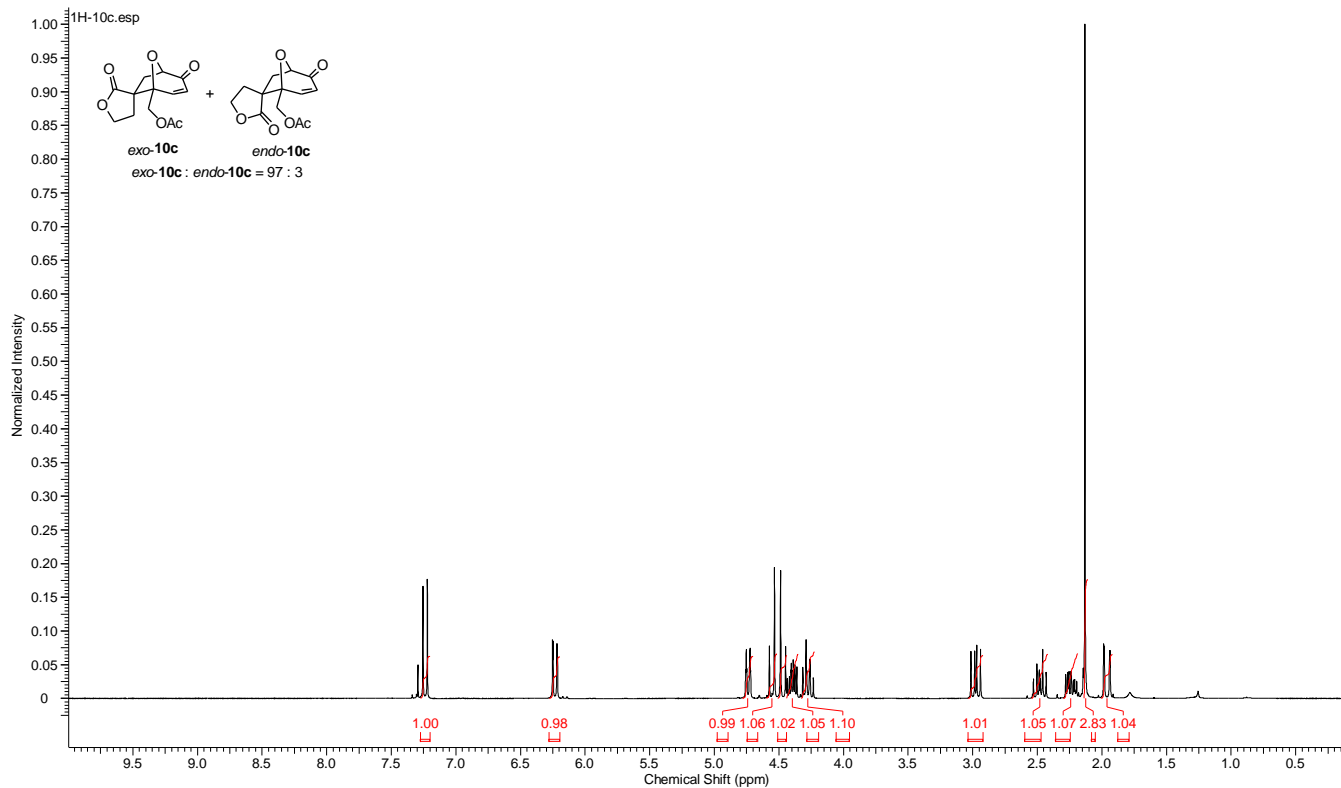

# <sup>13</sup>C NMR (75 MHz, CDCl<sub>3</sub>)

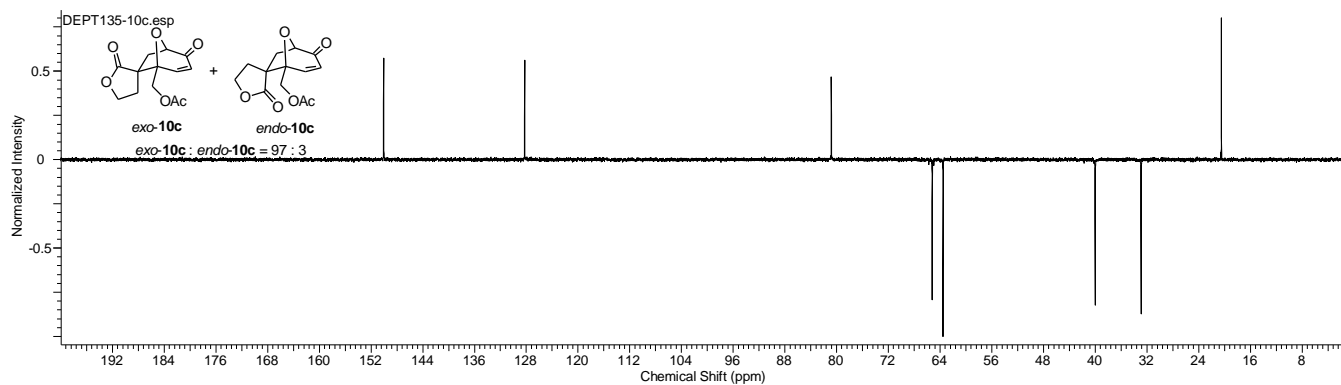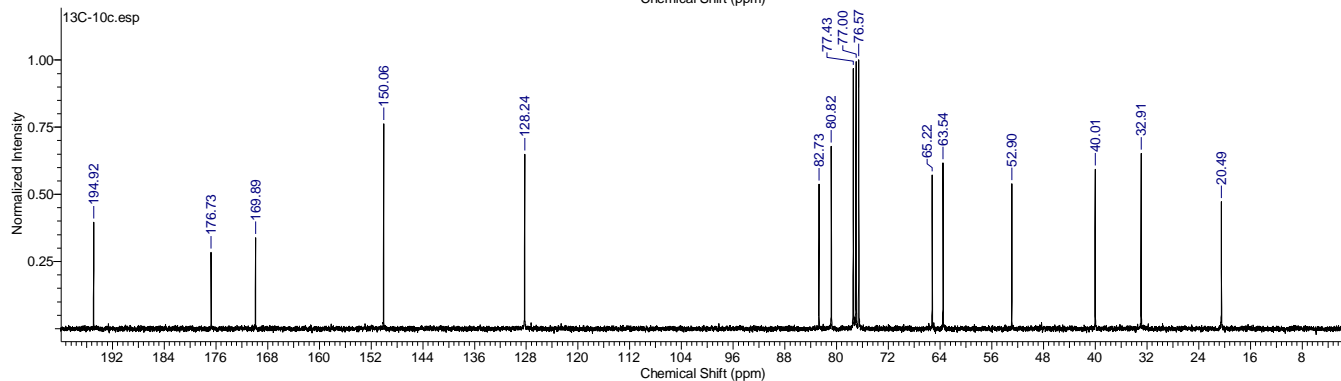

# <sup>1</sup>H NMR (300 MHz, CDCl<sub>3</sub>)

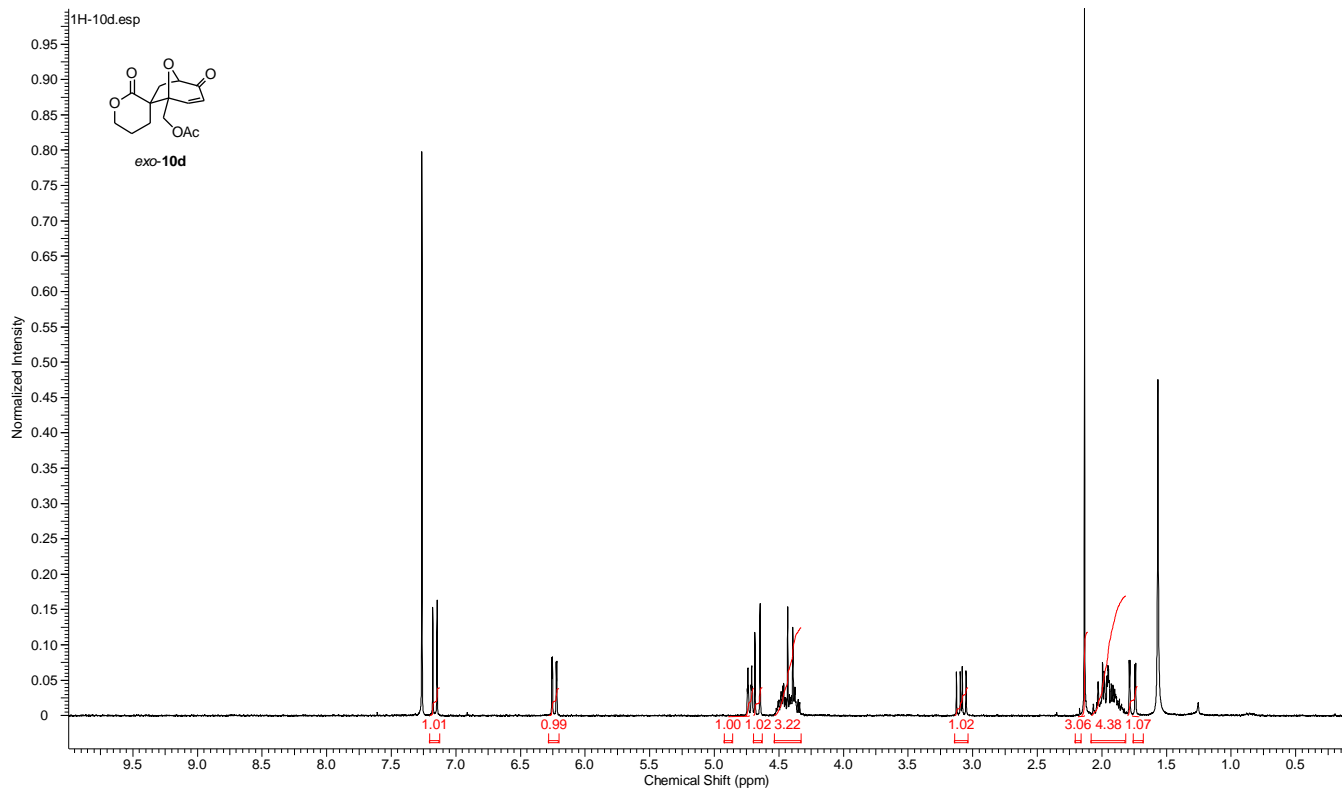

# <sup>13</sup>C NMR (75 MHz, CDCl<sub>3</sub>)

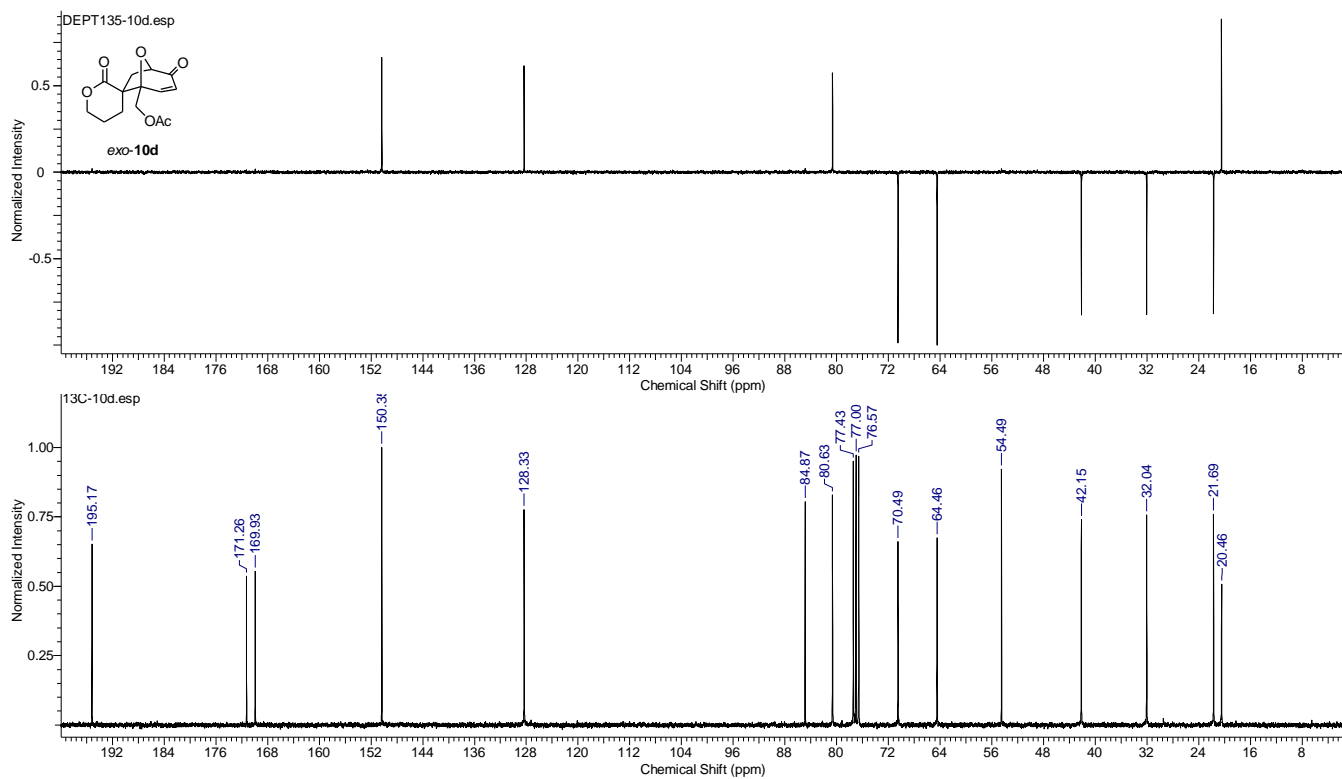



# <sup>1</sup>H NMR (300 MHz, CDCl<sub>3</sub>)

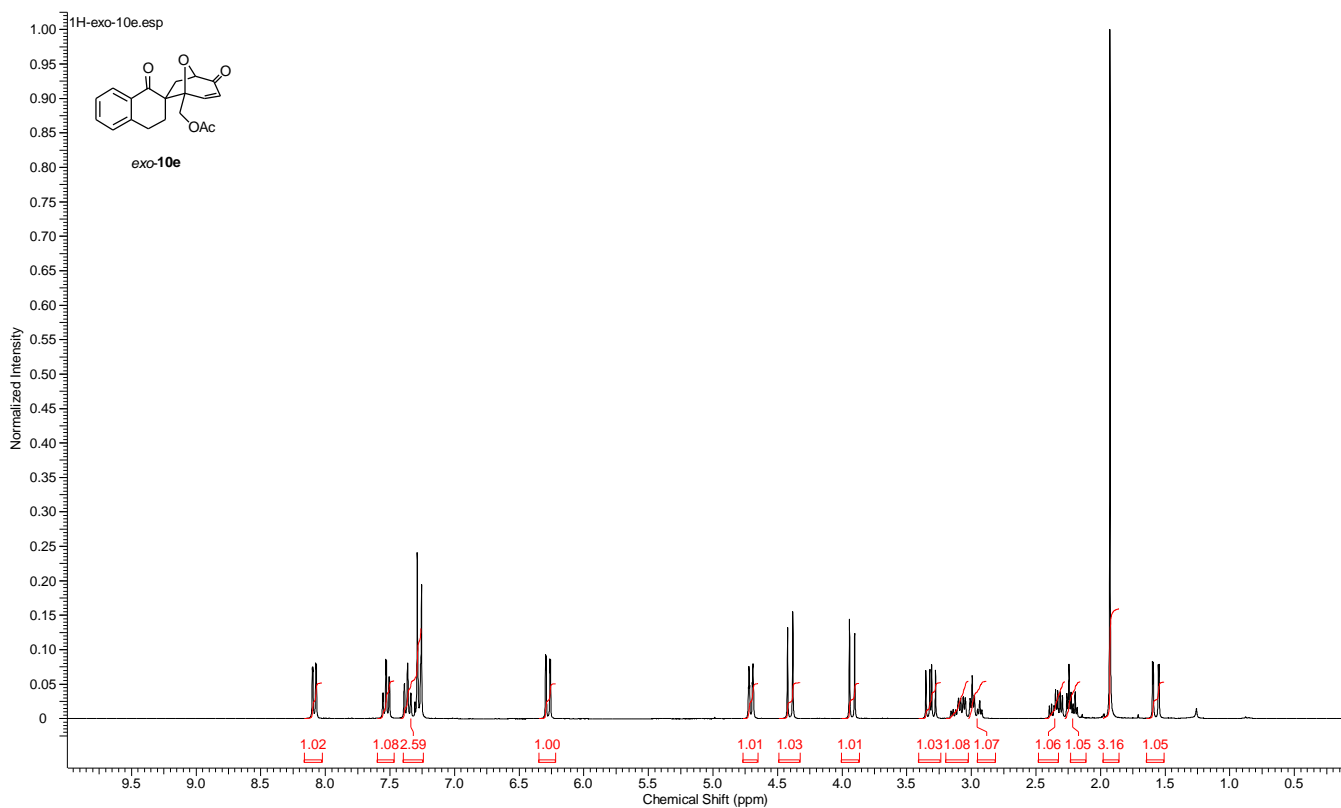

# <sup>13</sup>C NMR (75 MHz, CDCl<sub>3</sub>)

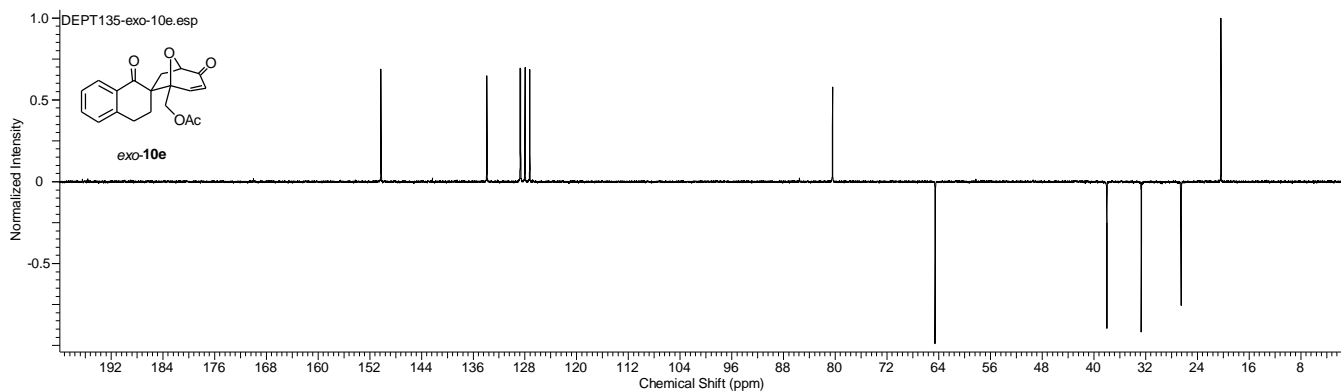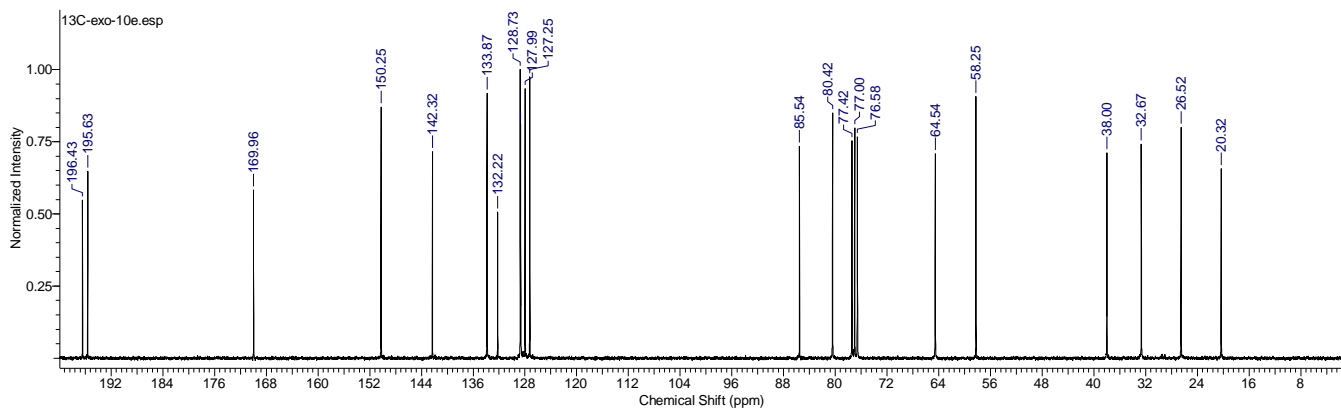

# <sup>1</sup>H NMR (300 MHz, CDCl<sub>3</sub>)

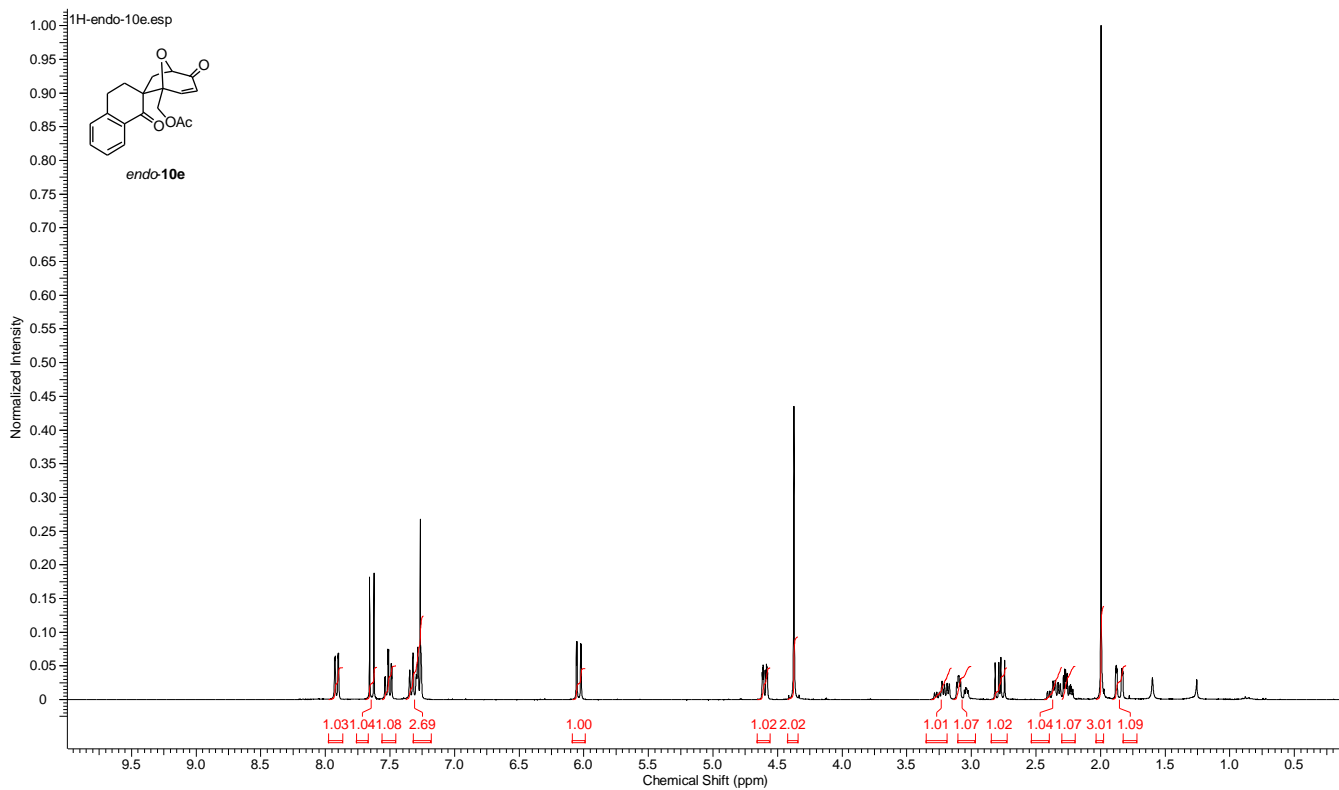

# <sup>13</sup>C NMR (75 MHz, CDCl<sub>3</sub>)

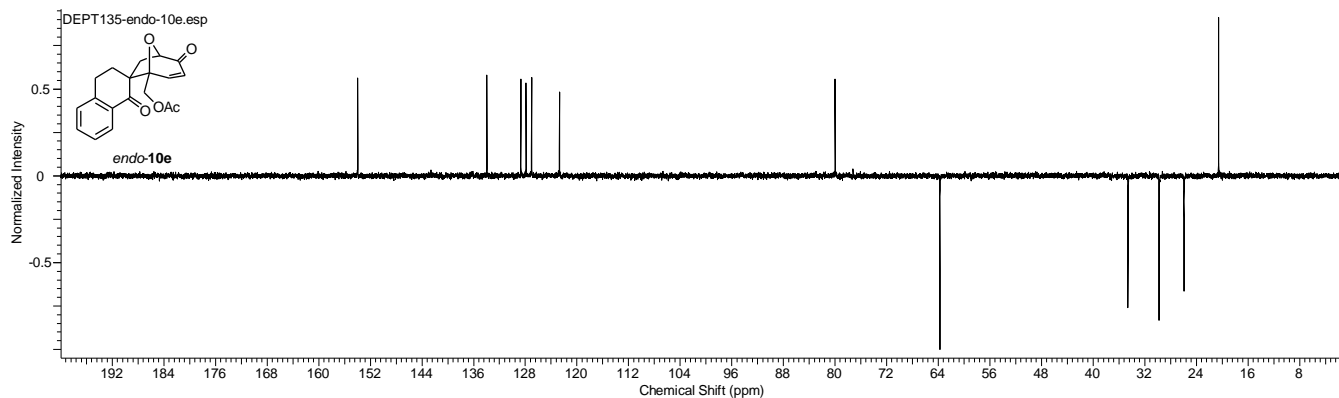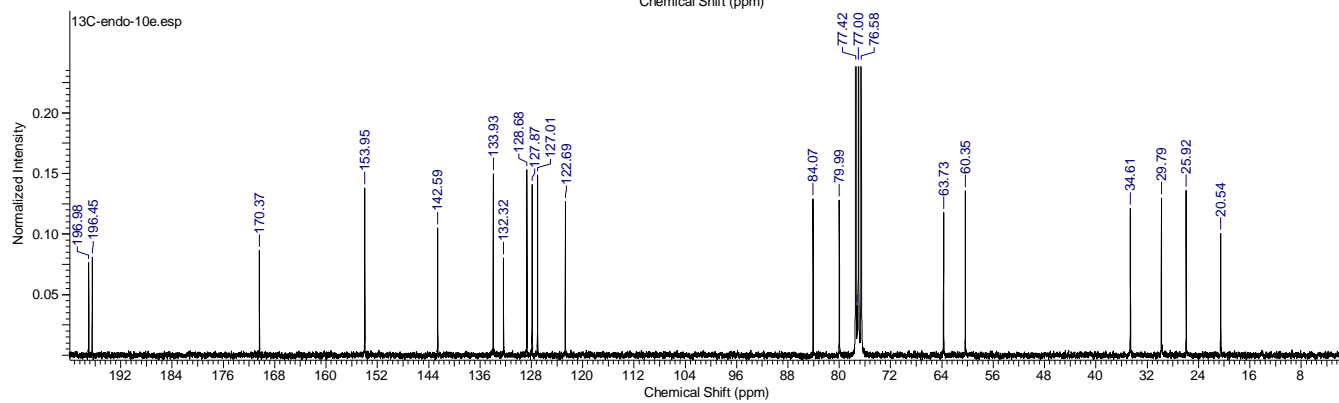

# <sup>1</sup>H NMR (300 MHz, CDCl<sub>3</sub>)

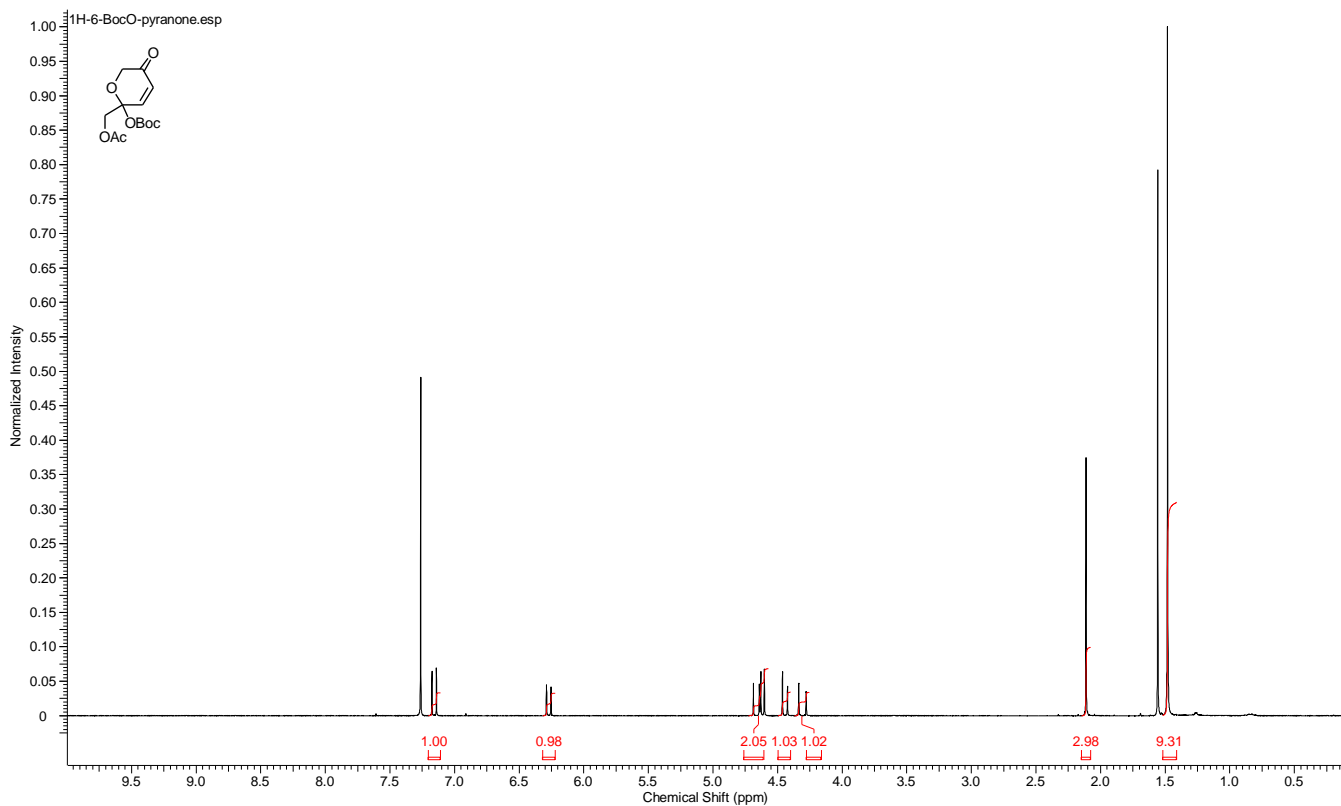

# <sup>13</sup>C NMR (75 MHz, CDCl<sub>3</sub>)

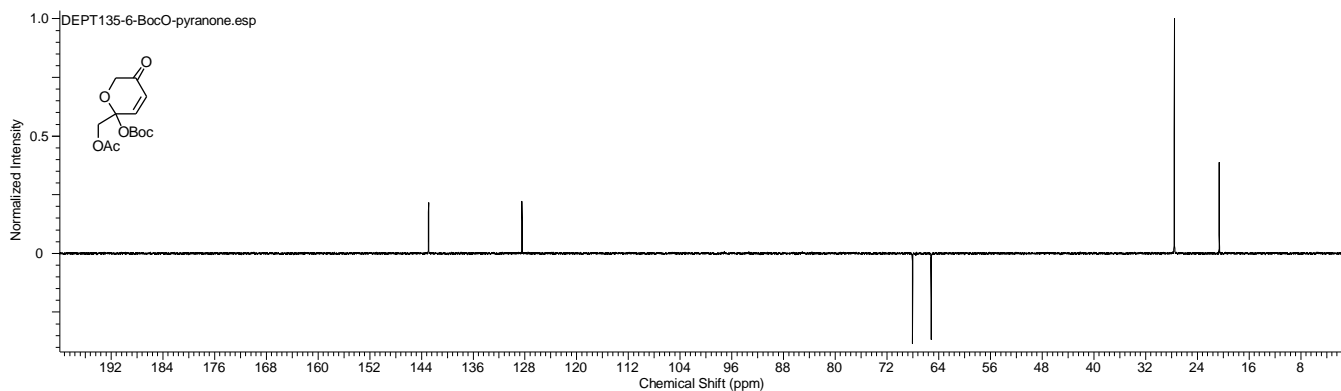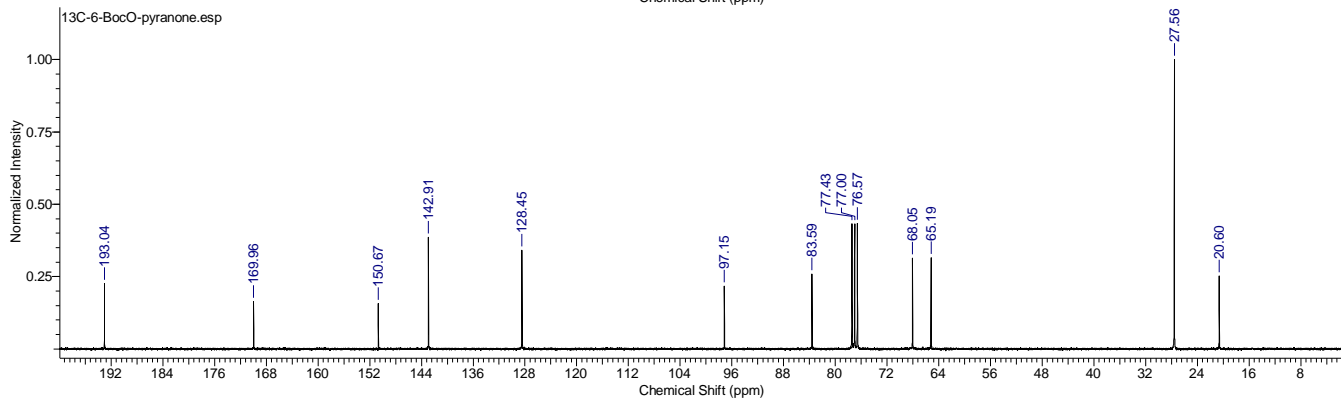

Supplement: c7cc09552j1.pdf [file c7cc09552j1.pdf]
